# Supplementary material for: Segmentation of the zebrafish axial skeleton relies on notochord sheath cells and not on the segmentation clock
Source: eLife journal article supplement (doi:10.7554/elife.33843), 2018-04-06
Supplement: supp [file elife-33843-supp-v1.zip]

**A** TALEN for *her1* injected into *her7<sup>hu2526</sup>* embryos

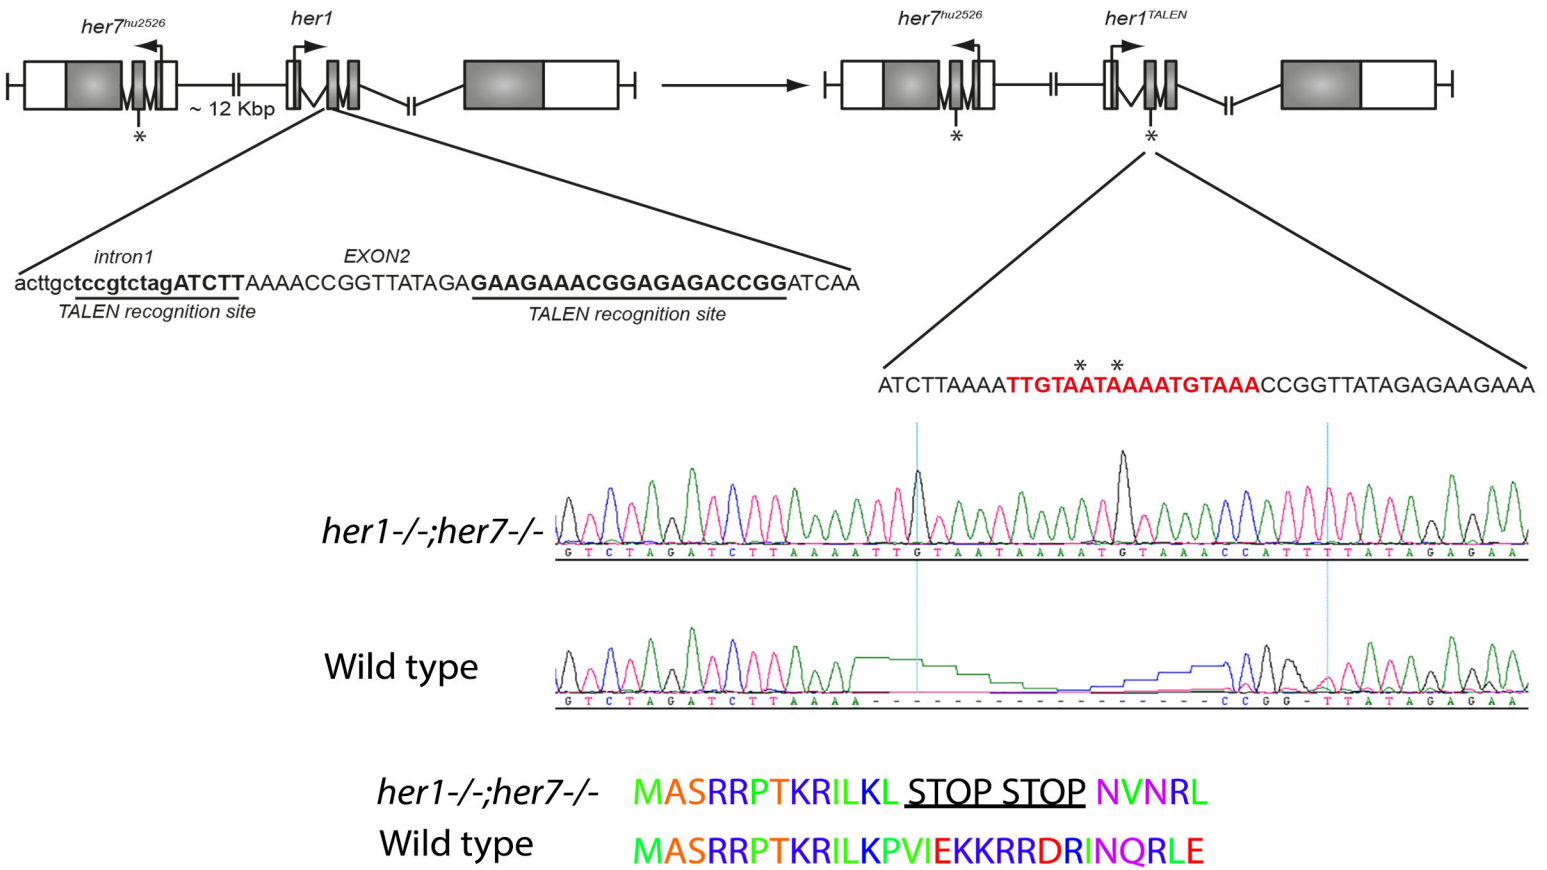

**B** TALEN for *hes6* injected into *wildtype* embryos

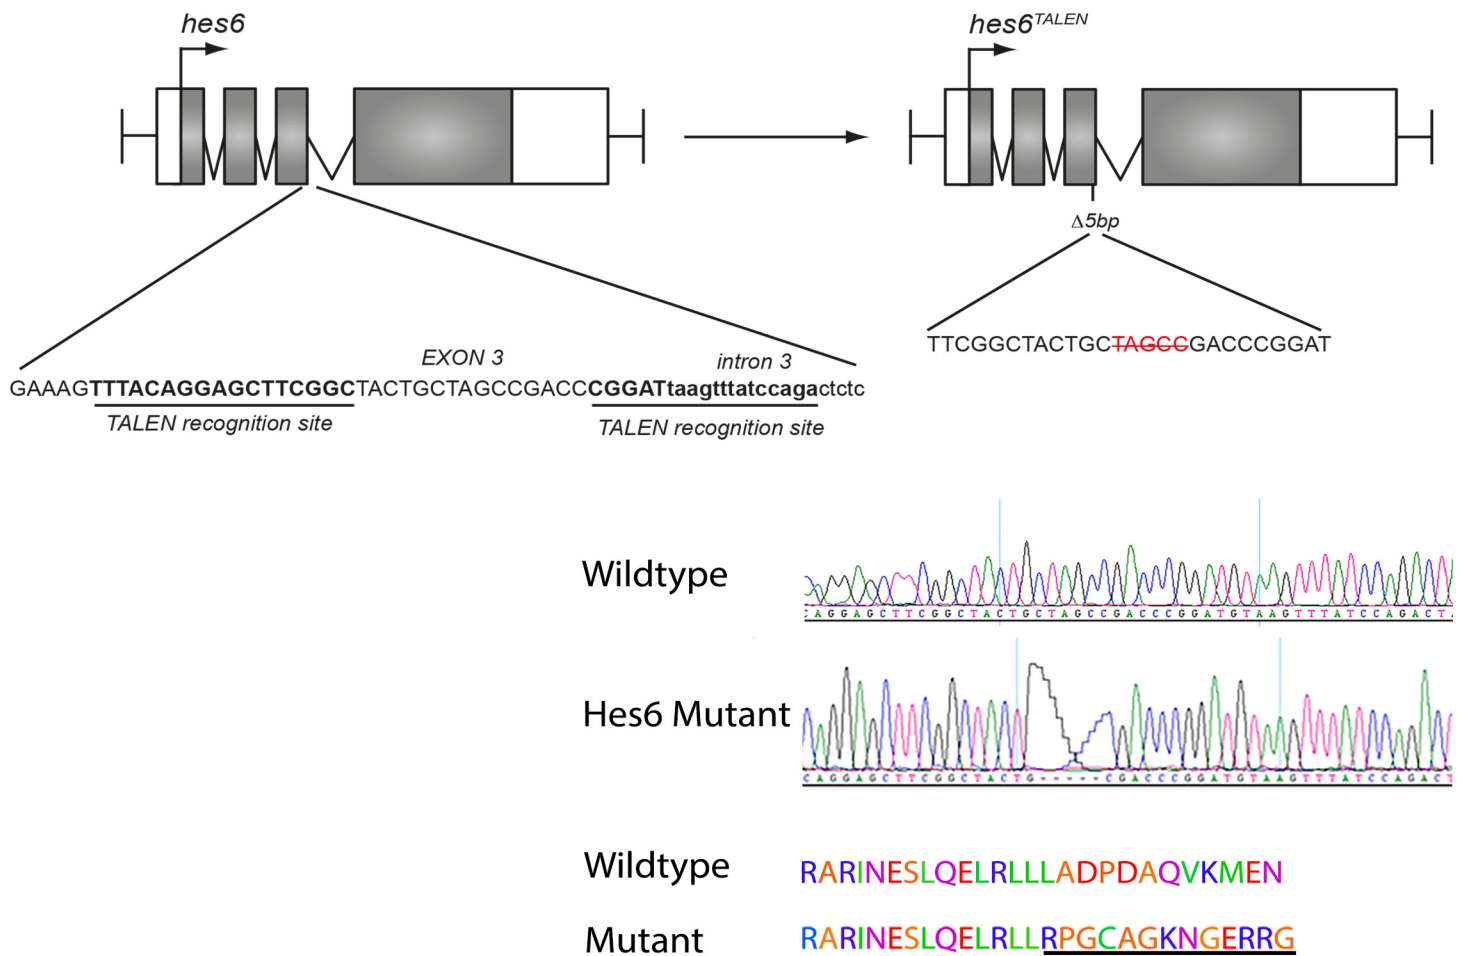

**Figure 1- figure supplement 1**
