# Supplementary material for: Segmentation of the zebrafish axial skeleton relies on notochord sheath cells and not on the segmentation clock
Source: eLife journal article supplement (doi:10.7554/elife.33843), 2018-04-06
Supplement: supp [file elife_poa_e33843_Figure_5_source_data_1.xlsx]

## Sheet: Tabelle2
		embryo 1						embryo 2
	no of defects	1	1	1	2	1	2	1	2	1	2	1	1
	position	3	4	11	13	19	26	8	10	13	16	23	24
measurement		1	2	3	4	5	6	7	8	9	10	11	12
mutant gap		493	694	623	1660	940	1020	757	1330	705	1000	492	589
values for wildtypes		517	671	418	1670	807	1170	476	976	505	850	372	393
		478	566	327	1380	767	1120	392	808	424	890	294	302
		568	553	400	1140	844	1420	351	890	327	951	335	400
		518	581	343	1440	784	1300	392	767	441	784	294	384
		478	537	359	1660	800	1340	343	948	473	802	457	400
		511	614	432	2090	1140	1260	539	1370	637	1150	317	297
		566	663	298	1710	986	1430	418	1040	486	1030	408	320
		526	596	506	1320	918	1140	398	757	406	911	433	348
		527	621	466	1400	961	1420	358	1090	393	952	425	405
		576	634	472	1830	965	1200	439	1080	499	1050	277	263
		568	614		1730	919		418	1030	506	1090
	ave	530.273	604.545	402.1	1579.09	899.182	1280	411.273	977.818	463.364	950.909	361.2	351.2
	std	35.2224	42.9915	68.9145	270.128	112.494	120.093	57.805	177.22	80.2886	118.565	66.2249	52.283
			check								check
	cv	0.0664232	0.0711138	0.171387	0.171065	0.125107	0.0938223	0.140552	0.18124	0.173273	0.124686	0.183347	0.14887
	95% CI ±	20.8147	25.4059	42.7129	159.632	66.4787	74.4328	34.1599	104.728	47.4466	70.0662	41.0458	32.4047
		first two embryos
	the cases with only one defect										second two embryos
	axial position	3	4	8	11	13	19	23	24		6	7	9	14	15	22	25	2	17	23
	defect distances	493	694	757	623	705	940	492	589		617	386	652	563	484	583	425	478	862	460
	control distances	517	671	476	418	505	807	372	393		374	419	465	434	371	358	335	493	769	372
		478	566	392	327	424	767	294	302		348	392	447	395	435	340	315	480	789	294
		568	553	351	400	327	844	335	400		436	414	459	500	393	323	336	478	828	335
		518	581	392	343	441	784	294	384		372	418	391	435	413	359	290	442	710	294
		478	537	343	359	473	800	457	400		252	287	323	416	360	332	377	453	890	457
		511	614	539	432	637	1140	317	297		350	341	413	440	404	350	404	446	839	317
		566	663	418	298	486	986	408	320		296	369	458	467	494	401	379	507	900	408
		526	596	398	506	406	918	433	348		312	403	471	429	474	414	335	477	806	433
		527	621	358	466	393	961	425	405		263	338	381	360	369	305	327	562	710	425
		576	634	439	472	499	965	277	263		346	390	387	460	395	299	262	463	748	277
		568	614	418		506	919				321	319	284	360	349	252	364	448	754	351
											304	408	426	335	334	349	371	433	780	335
											386	408	378	453	460	304	356	537	821	351
											330	360	357	379	349	327	282	541	853	231
											315	353	343	342	356	393	313	467	831	129
												267	315	357	371	373	480	504	777	320
fusion In= 1, 2, 4,5,7	segments organized by position along length
				defect	control distances
		1
		2		478	493	480	478	442	453	446	507	477	562	463	448	433	537	541	467	504
		3		493	517	478	568	518	478	511	566	526	527	576	568
		4		694	671	566	553	581	537	614	663	596	621	634	614
		5
		6		617	374	348	436	372	252	350	296	312	263	346	321	304	386	330	315
		7		386	419	392	414	418	287	341	369	403	338	390	319	408	408	360	353	267
		8		757	476	392	351	392	343	539	418	398	358	439	418
		9		652	465	447	459	391	323	413	458	471	381	387	284	426	378	357	343	315
		10
		11		623	418	327	400	343	359	432	298	506	466	472
		12
		13		705	505	424	327	441	473	637	486	406	393	499	506
		14		563	434	395	500	435	416	440	467	429	360	460	360	335	453	379	342	357
		15		484	371	435	393	413	360	404	494	474	369	395	349	334	460	349	356	371
		16
		17		862	769	789	828	710	890	839	900	806	710	748	754	780	821	853	831	777
		18
		19		940	807	767	844	784	800	1140	986	918	961	965	919
		20
		21
		22		583	358	340	323	359	332	350	401	414	305	299	252	349	304	327	393	373
		23		492	372	294	335	294	457	317	408	433	425	277
		23		460	372	294	335	294	457	317	408	433	425	277	351	335	351	231	129	320
		24		589	393	302	400	384	400	297	320	348	405	263
		25		425	335	315	336	290	377	404	379	335	327	262	364	371	356	282	313	480
		26
		27
		28
		29
		30

## Sheet: Tabelle1
						embryo 1
					no of defects	1	1	1	2	1	2	1	2	1	2	1	1
					position	3	4	11	13	19	26	8	10	13	16	23	24
				measurement		1	2	3	4	5	6	7	8	9	10	11	12
				mutant gap		493	694	623	1660	940	1020	757	1330	705	1000	492	589
				values for wildtypes		517	671	418	1670	807	1170	476	976	505	850	372	393
						478	566	327	1380	767	1120	392	808	424	890	294	302
						568	553	400	1140	844	1420	351	890	327	951	335	400
						518	581	343	1440	784	1300	392	767	441	784	294	384
						478	537	359	1660	800	1340	343	948	473	802	457	400
						511	614	432	2090	1140	1260	539	1370	637	1150	317	297
						566	663	298	1710	986	1430	418	1040	486	1030	408	320
						526	596	506	1320	918	1140	398	757	406	911	433	348
						527	621	466	1400	961	1420	358	1090	393	952	425	405
						576	634	472	1830	965	1200	439	1080	499	1050	277	263
						568	614		1730	919		418	1030	506	1090
					ave	530.273	604.545	402.1	1579.09	899.182	1280	411.273	977.818	463.364	950.909	361.2	351.2
					std	35.2224	42.9915	68.9145	270.128	112.494	120.093	57.805	177.22	80.2886	118.565	66.2249	52.283
							check								check
					cv	0.0664232	0.0711138	0.171387	0.171065	0.125107	0.0938223	0.140552	0.18124	0.173273	0.124686	0.183347	0.14887
					95% CI ±	20.8147	25.4059	42.7129	159.632	66.4787	74.4328	34.1599	104.728	47.4466	70.0662	41.0458	32.4047
						first two embryos
					the cases with only one defect										second two embryos
					axial position	3	4	8	11	13	19	23	24		6	7	9	14	15	22	25	2	17	23
					defect distances	493	694	757	623	705	940	492	589		617	386	652	563	484	583	425	478	862	460
					control distances	517	671	476	418	505	807	372	393		374	419	465	434	371	358	335	493	769	372
						478	566	392	327	424	767	294	302		348	392	447	395	435	340	315	480	789	294
						568	553	351	400	327	844	335	400		436	414	459	500	393	323	336	478	828	335
						518	581	392	343	441	784	294	384		372	418	391	435	413	359	290	442	710	294
						478	537	343	359	473	800	457	400		252	287	323	416	360	332	377	453	890	457
						511	614	539	432	637	1140	317	297		350	341	413	440	404	350	404	446	839	317
						566	663	418	298	486	986	408	320		296	369	458	467	494	401	379	507	900	408
						526	596	398	506	406	918	433	348		312	403	471	429	474	414	335	477	806	433
						527	621	358	466	393	961	425	405		263	338	381	360	369	305	327	562	710	425
						576	634	439	472	499	965	277	263		346	390	387	460	395	299	262	463	748	277
						568	614	418		506	919				321	319	284	360	349	252	364	448	754	351
															304	408	426	335	334	349	371	433	780	335
															386	408	378	453	460	304	356	537	821	351
															330	360	357	379	349	327	282	541	853	231
															315	353	343	342	356	393	313	467	831	129
																267	315	357	371	373	480	504	777	320
				fusion In= 1, 2, 4,5,7	segments organized by position along length
								defect	control distances
						1
						2		478	493	480	478	442	453	446	507	477	562	463	448	433	537	541	467	504
						3		493	517	478	568	518	478	511	566	526	527	576	568
						4		694	671	566	553	581	537	614	663	596	621	634	614
						5
						6		617	374	348	436	372	252	350	296	312	263	346	321	304	386	330	315
						7		386	419	392	414	418	287	341	369	403	338	390	319	408	408	360	353	267
						8		757	476	392	351	392	343	539	418	398	358	439	418
						9		652	465	447	459	391	323	413	458	471	381	387	284	426	378	357	343	315
						10
						11		623	418	327	400	343	359	432	298	506	466	472
						12
						13		705	505	424	327	441	473	637	486	406	393	499	506
						14		563	434	395	500	435	416	440	467	429	360	460	360	335	453	379	342	357
						15		484	371	435	393	413	360	404	494	474	369	395	349	334	460	349	356	371
						16
						17		862	769	789	828	710	890	839	900	806	710	748	754	780	821	853	831	777
						18
						19		940	807	767	844	784	800	1140	986	918	961	965	919
						20
						21
						22		583	358	340	323	359	332	350	401	414	305	299	252	349	304	327	393	373
						23		492	372	294	335	294	457	317	408	433	425	277
						23		460	372	294	335	294	457	317	408	433	425	277	351	335	351	231	129	320
						24		589	393	302	400	384	400	297	320	348	405	263
						25		425	335	315	336	290	377	404	379	335	327	262	364	371	356	282	313	480
						26
						27
						28
						29
						30
