# Supplementary figures and images for: Segmentation of the zebrafish axial skeleton relies on notochord sheath cells and not on the segmentation clock (part 1 of 2)
Source: eLife journal article supplement (doi:10.7554/elife.33843), 2018-04-06

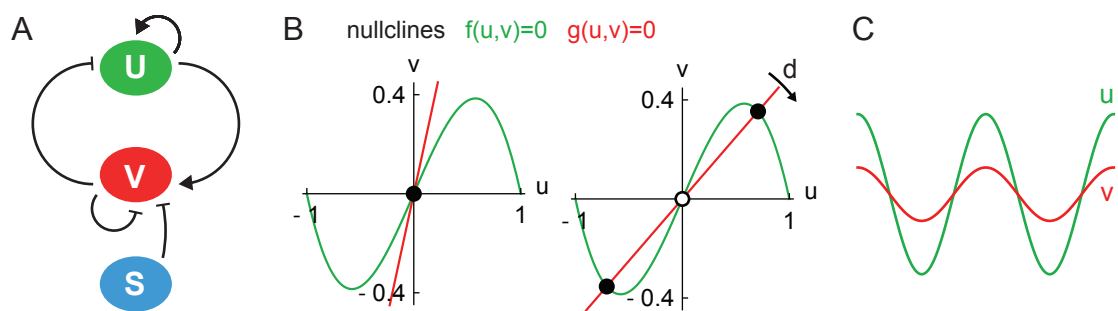

Figure 7-Figure supplement 9

Supplement: supp [file elife-33843-supp-v1.zip]

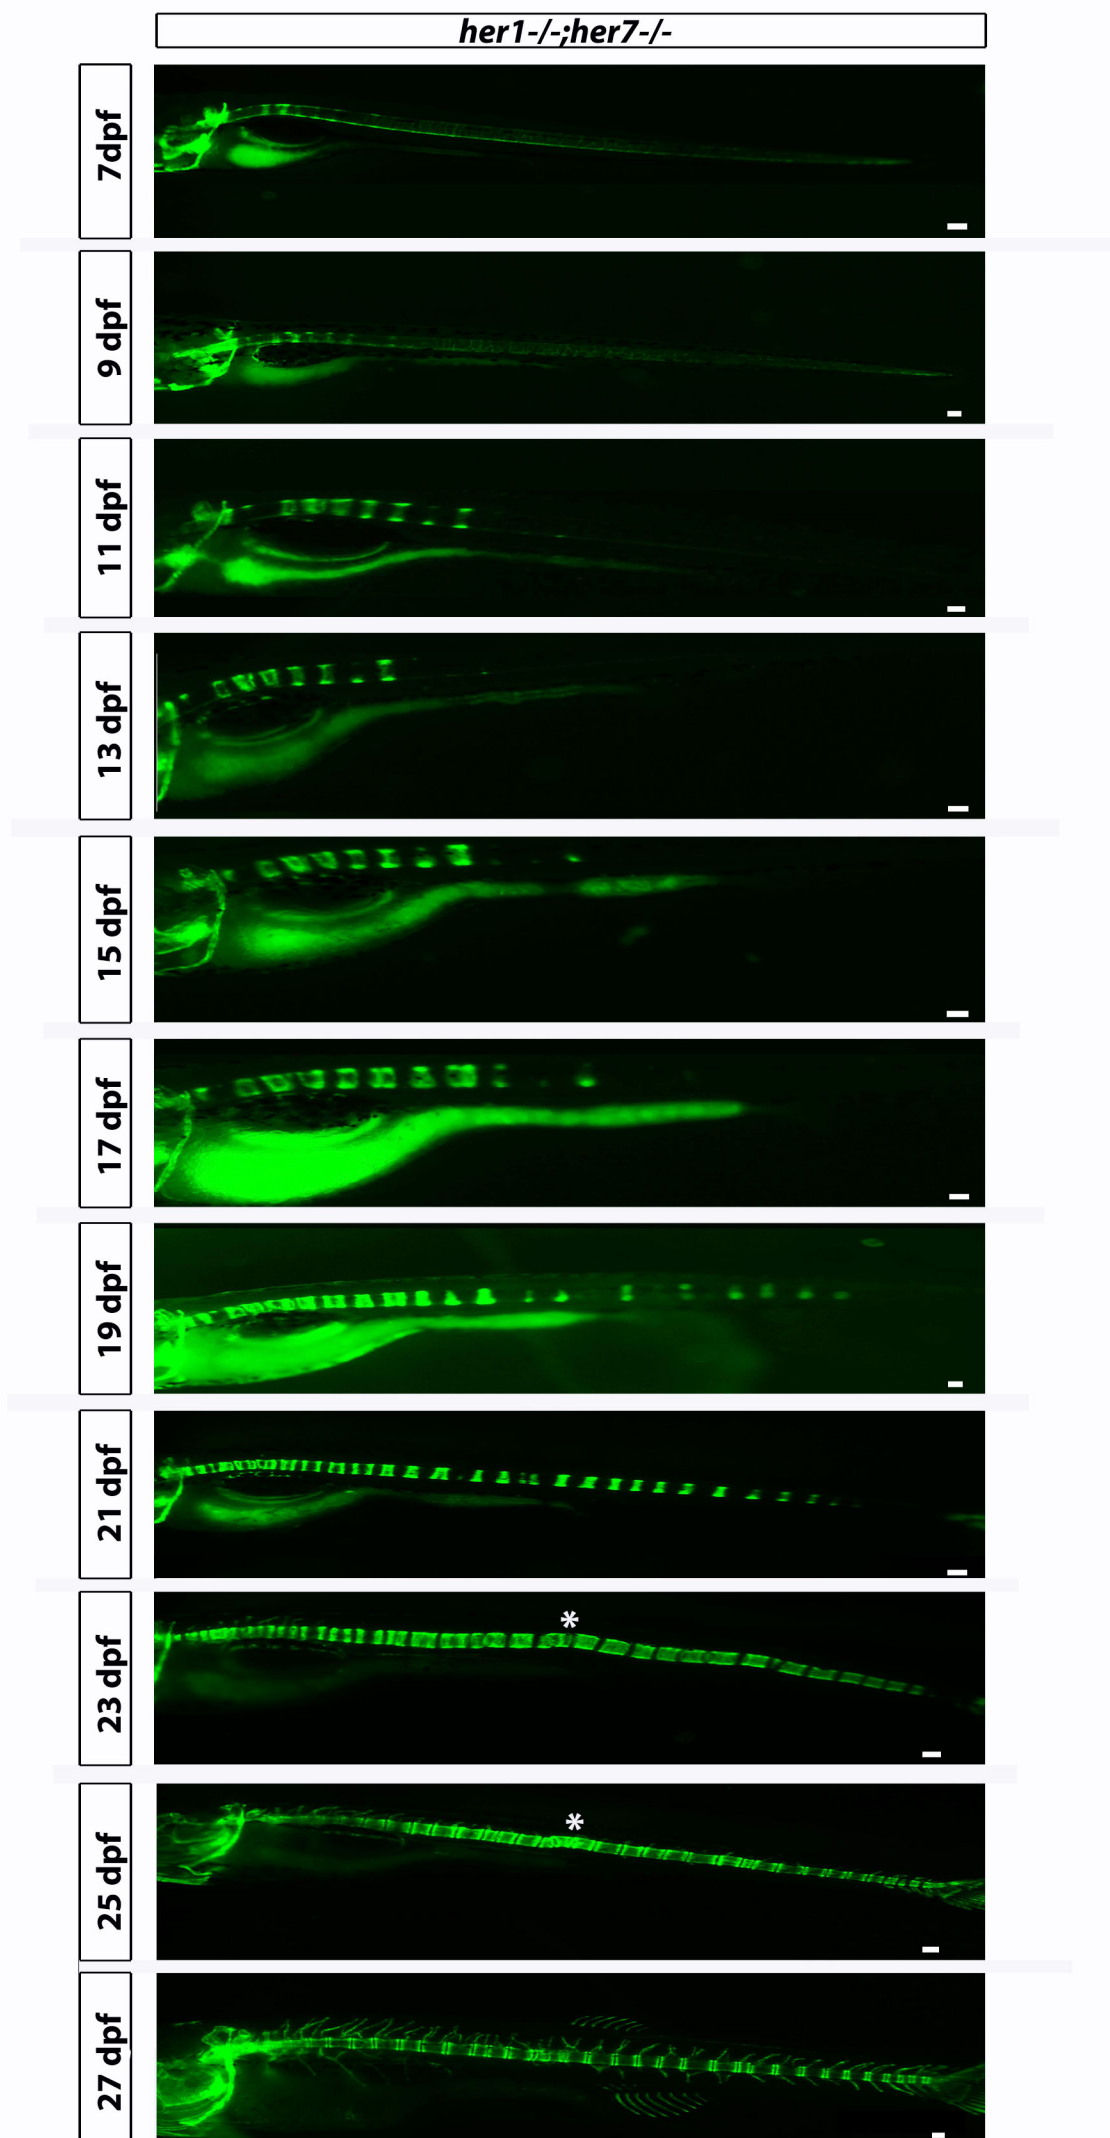

Figure 4- figure supplement 3

Supplement: supp [file elife-33843-supp-v1.zip]

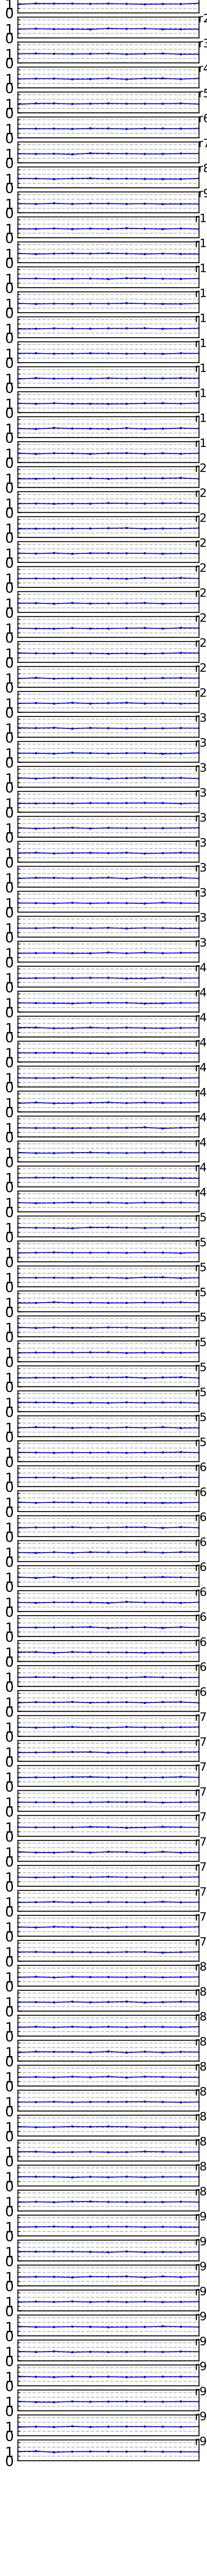

Supplement: supp [file elife-33843-supp-v1.zip]

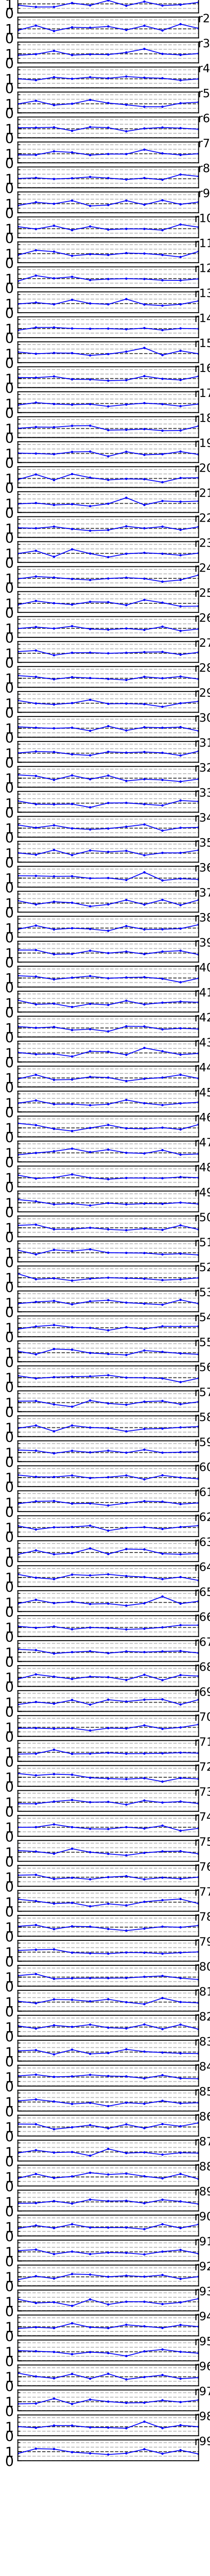

Supplement: supp [file elife-33843-supp-v1.zip]

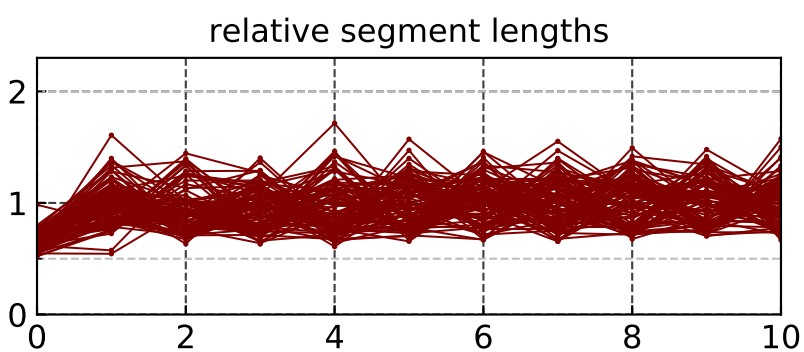

Supplement: supp [file elife-33843-supp-v1.zip]

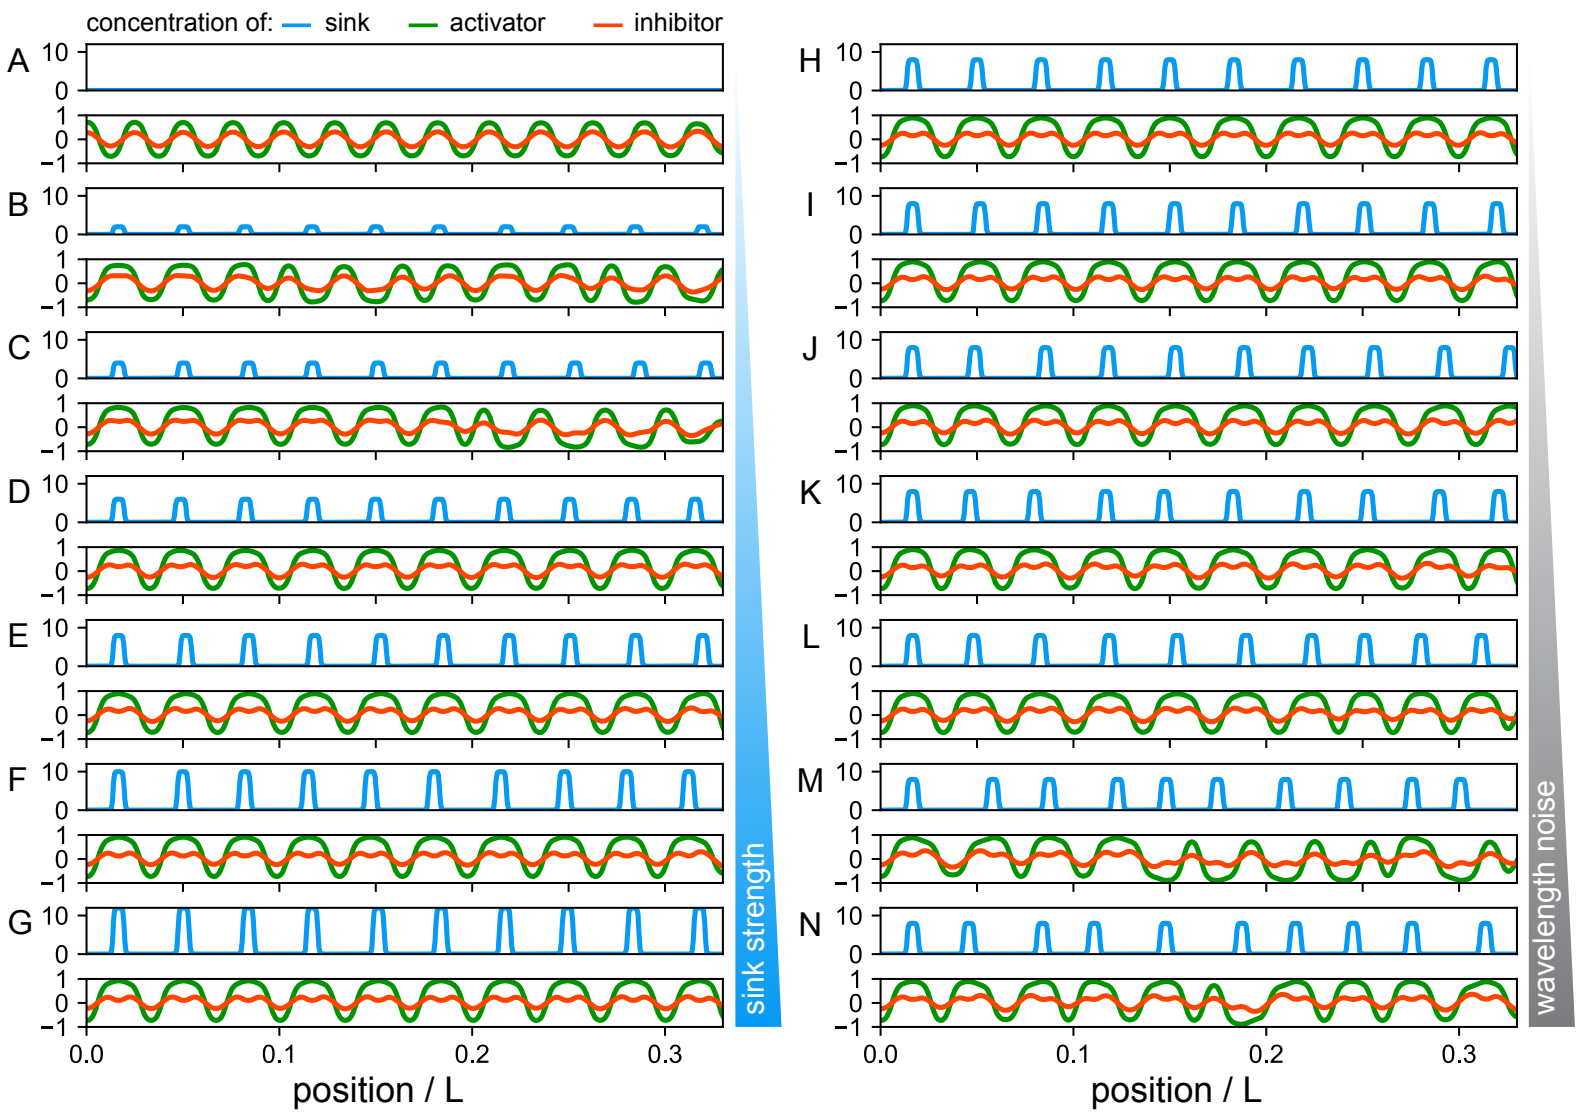

Figure 7-Figure supplement 6

Supplement: supp [file elife-33843-supp-v1.zip]

# Histogram of peak counts

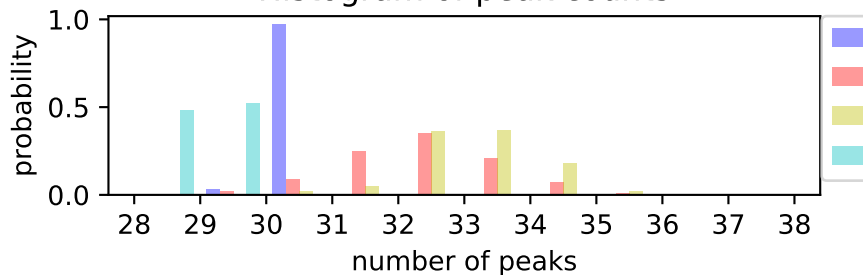

# Histogram of defects per embryo

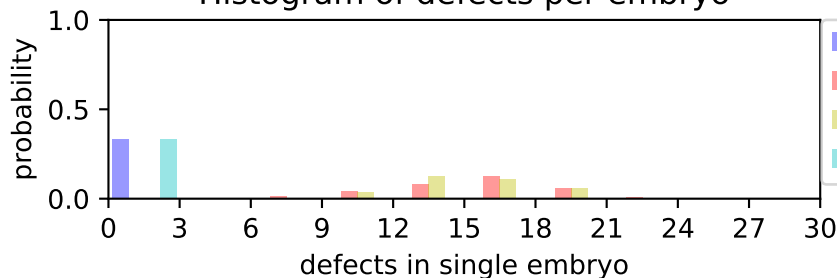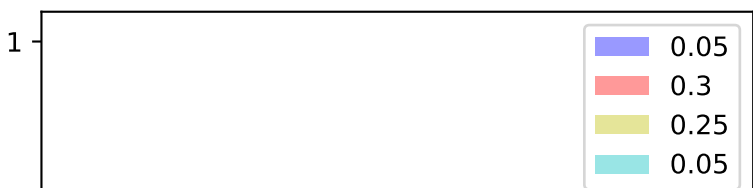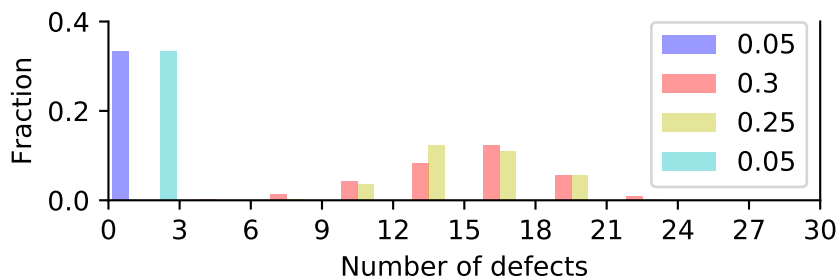

Supplement: supp [file elife-33843-supp-v1.zip]

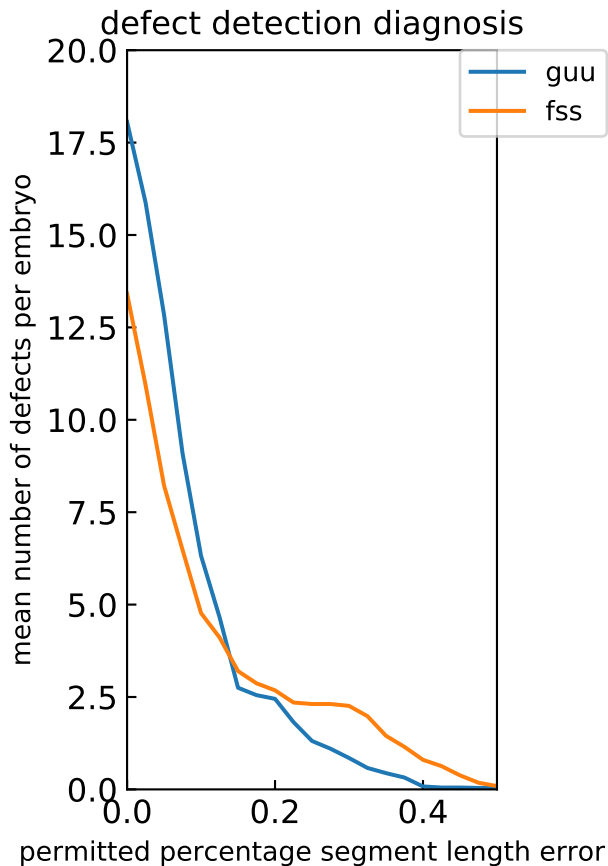

Supplement: supp [file elife-33843-supp-v1.zip]

# Histogram of peak counts

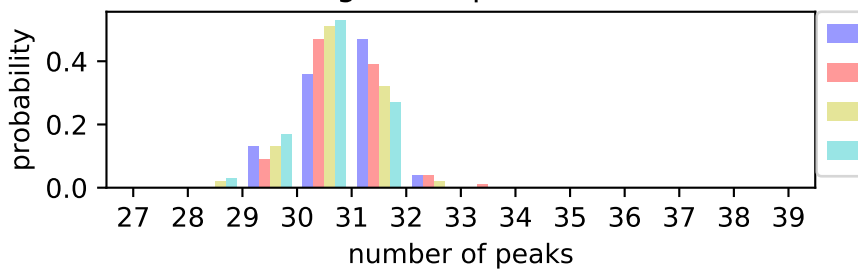

# Histogram of defects per embryo

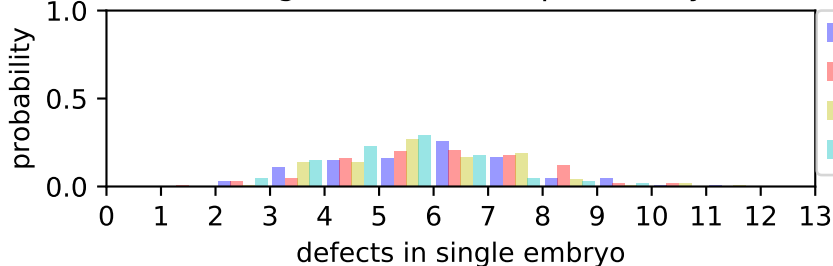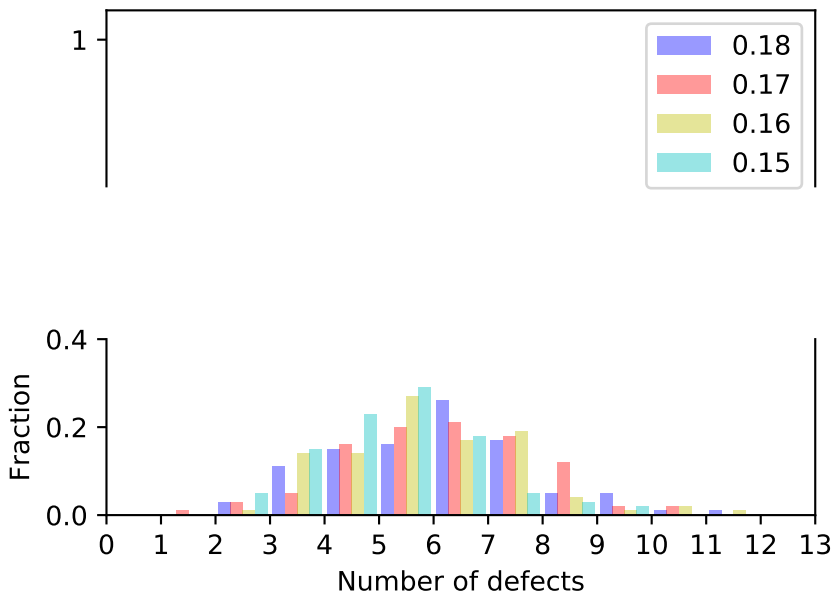

Supplement: supp [file elife-33843-supp-v1.zip]

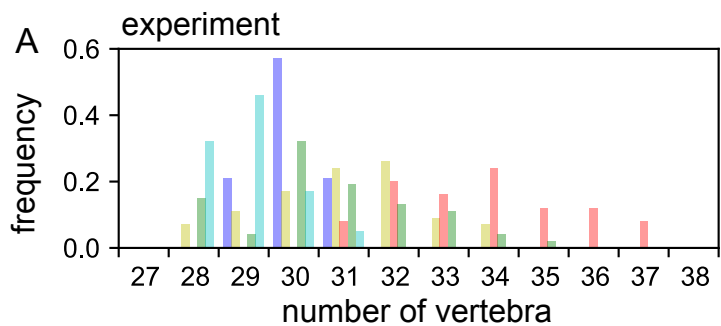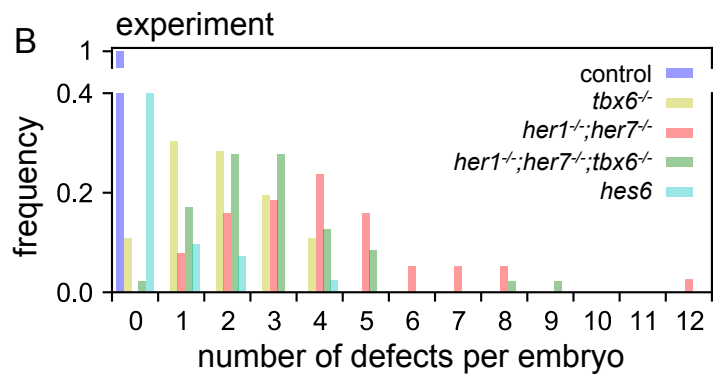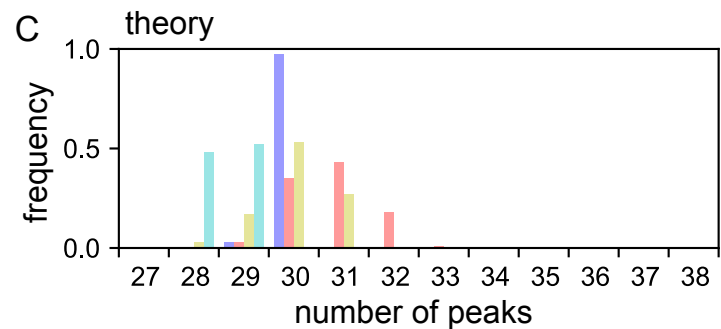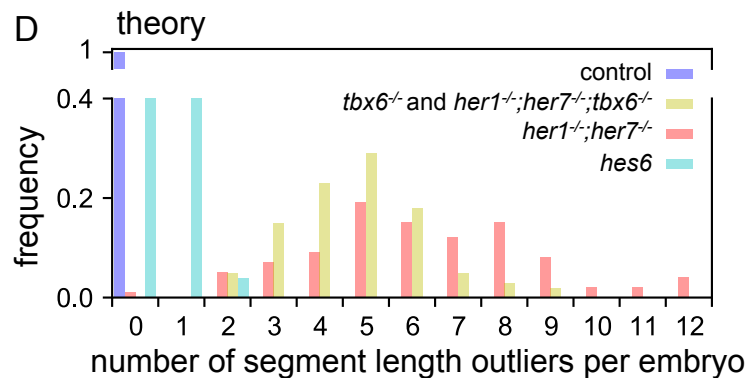

**Figure 7-Figure supplement 8**

Supplement: supp [file elife-33843-supp-v1.zip]

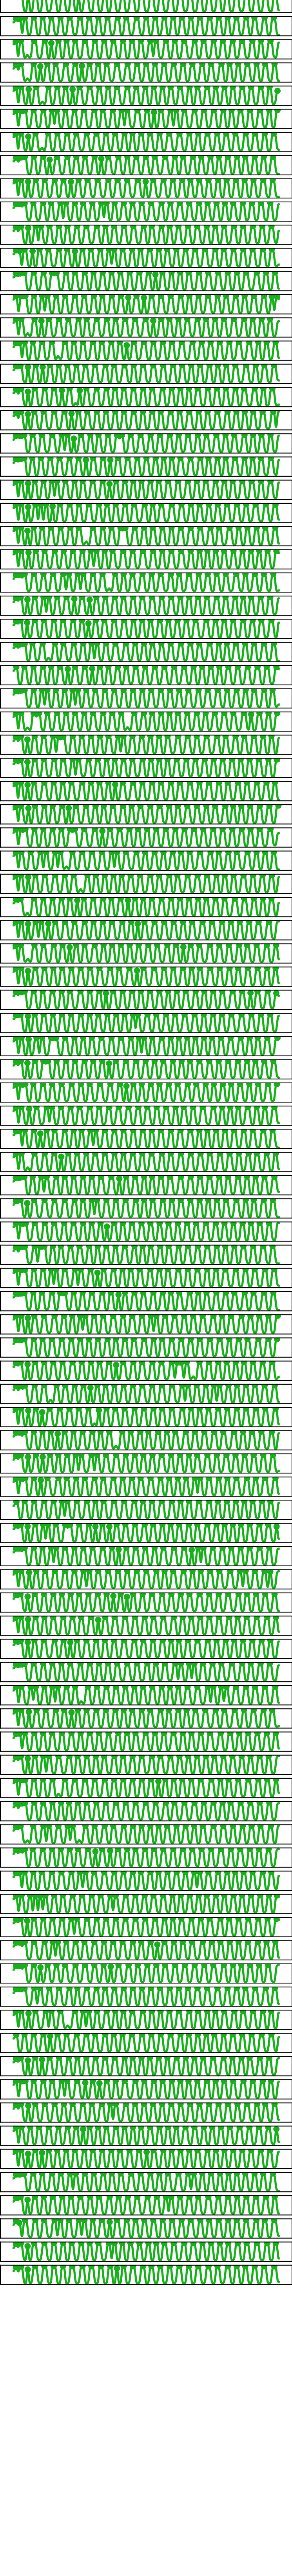

Supplement: supp [file elife-33843-supp-v1.zip]

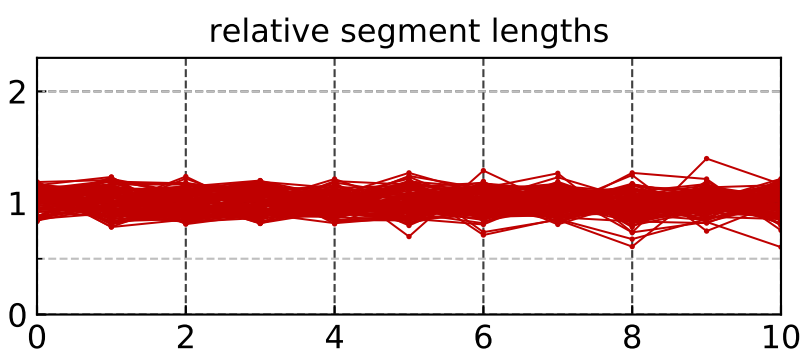

Supplement: supp [file elife-33843-supp-v1.zip]

# Histogram of peak counts

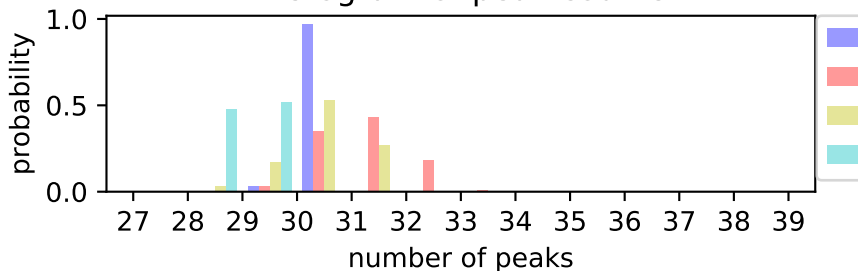

# Histogram of defects per embryo

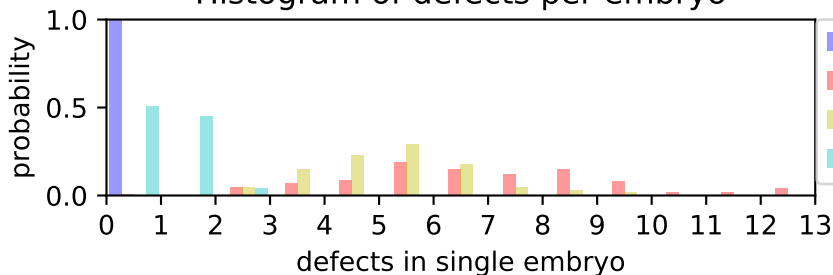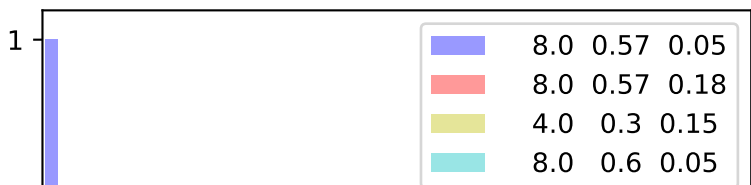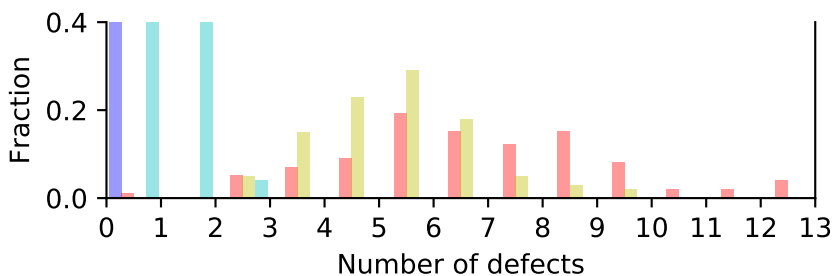

Supplement: supp [file elife-33843-supp-v1.zip]

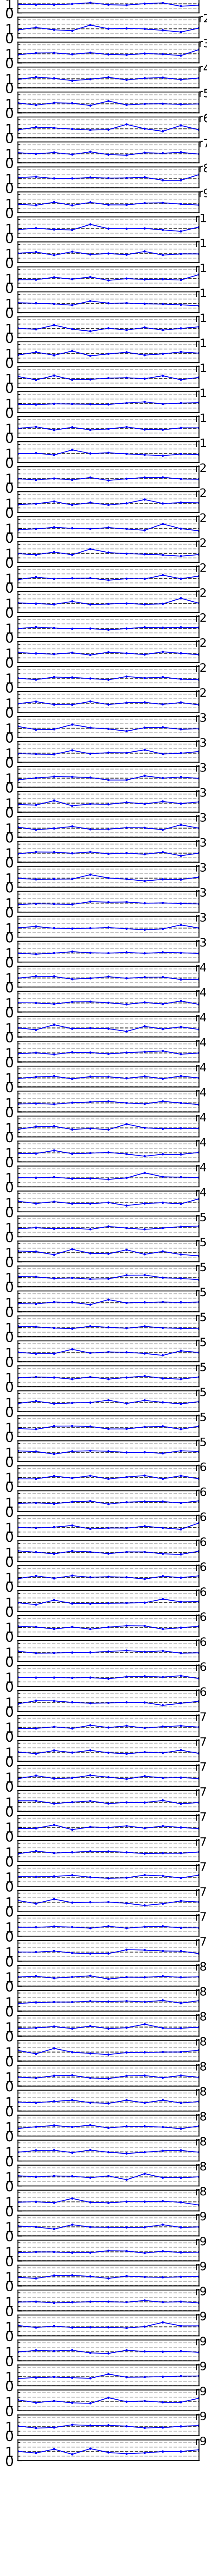

Supplement: supp [file elife-33843-supp-v1.zip]

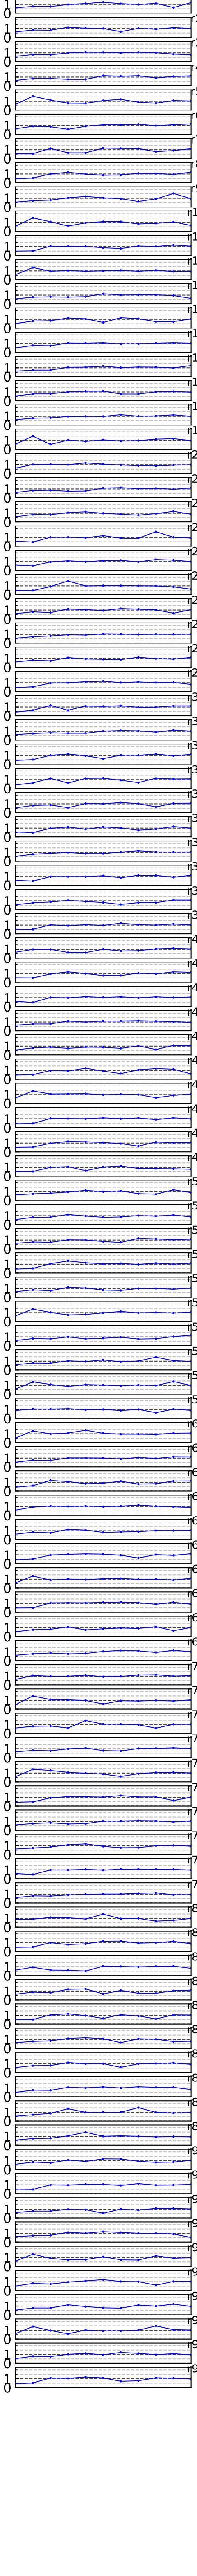

Supplement: supp [file elife-33843-supp-v1.zip]

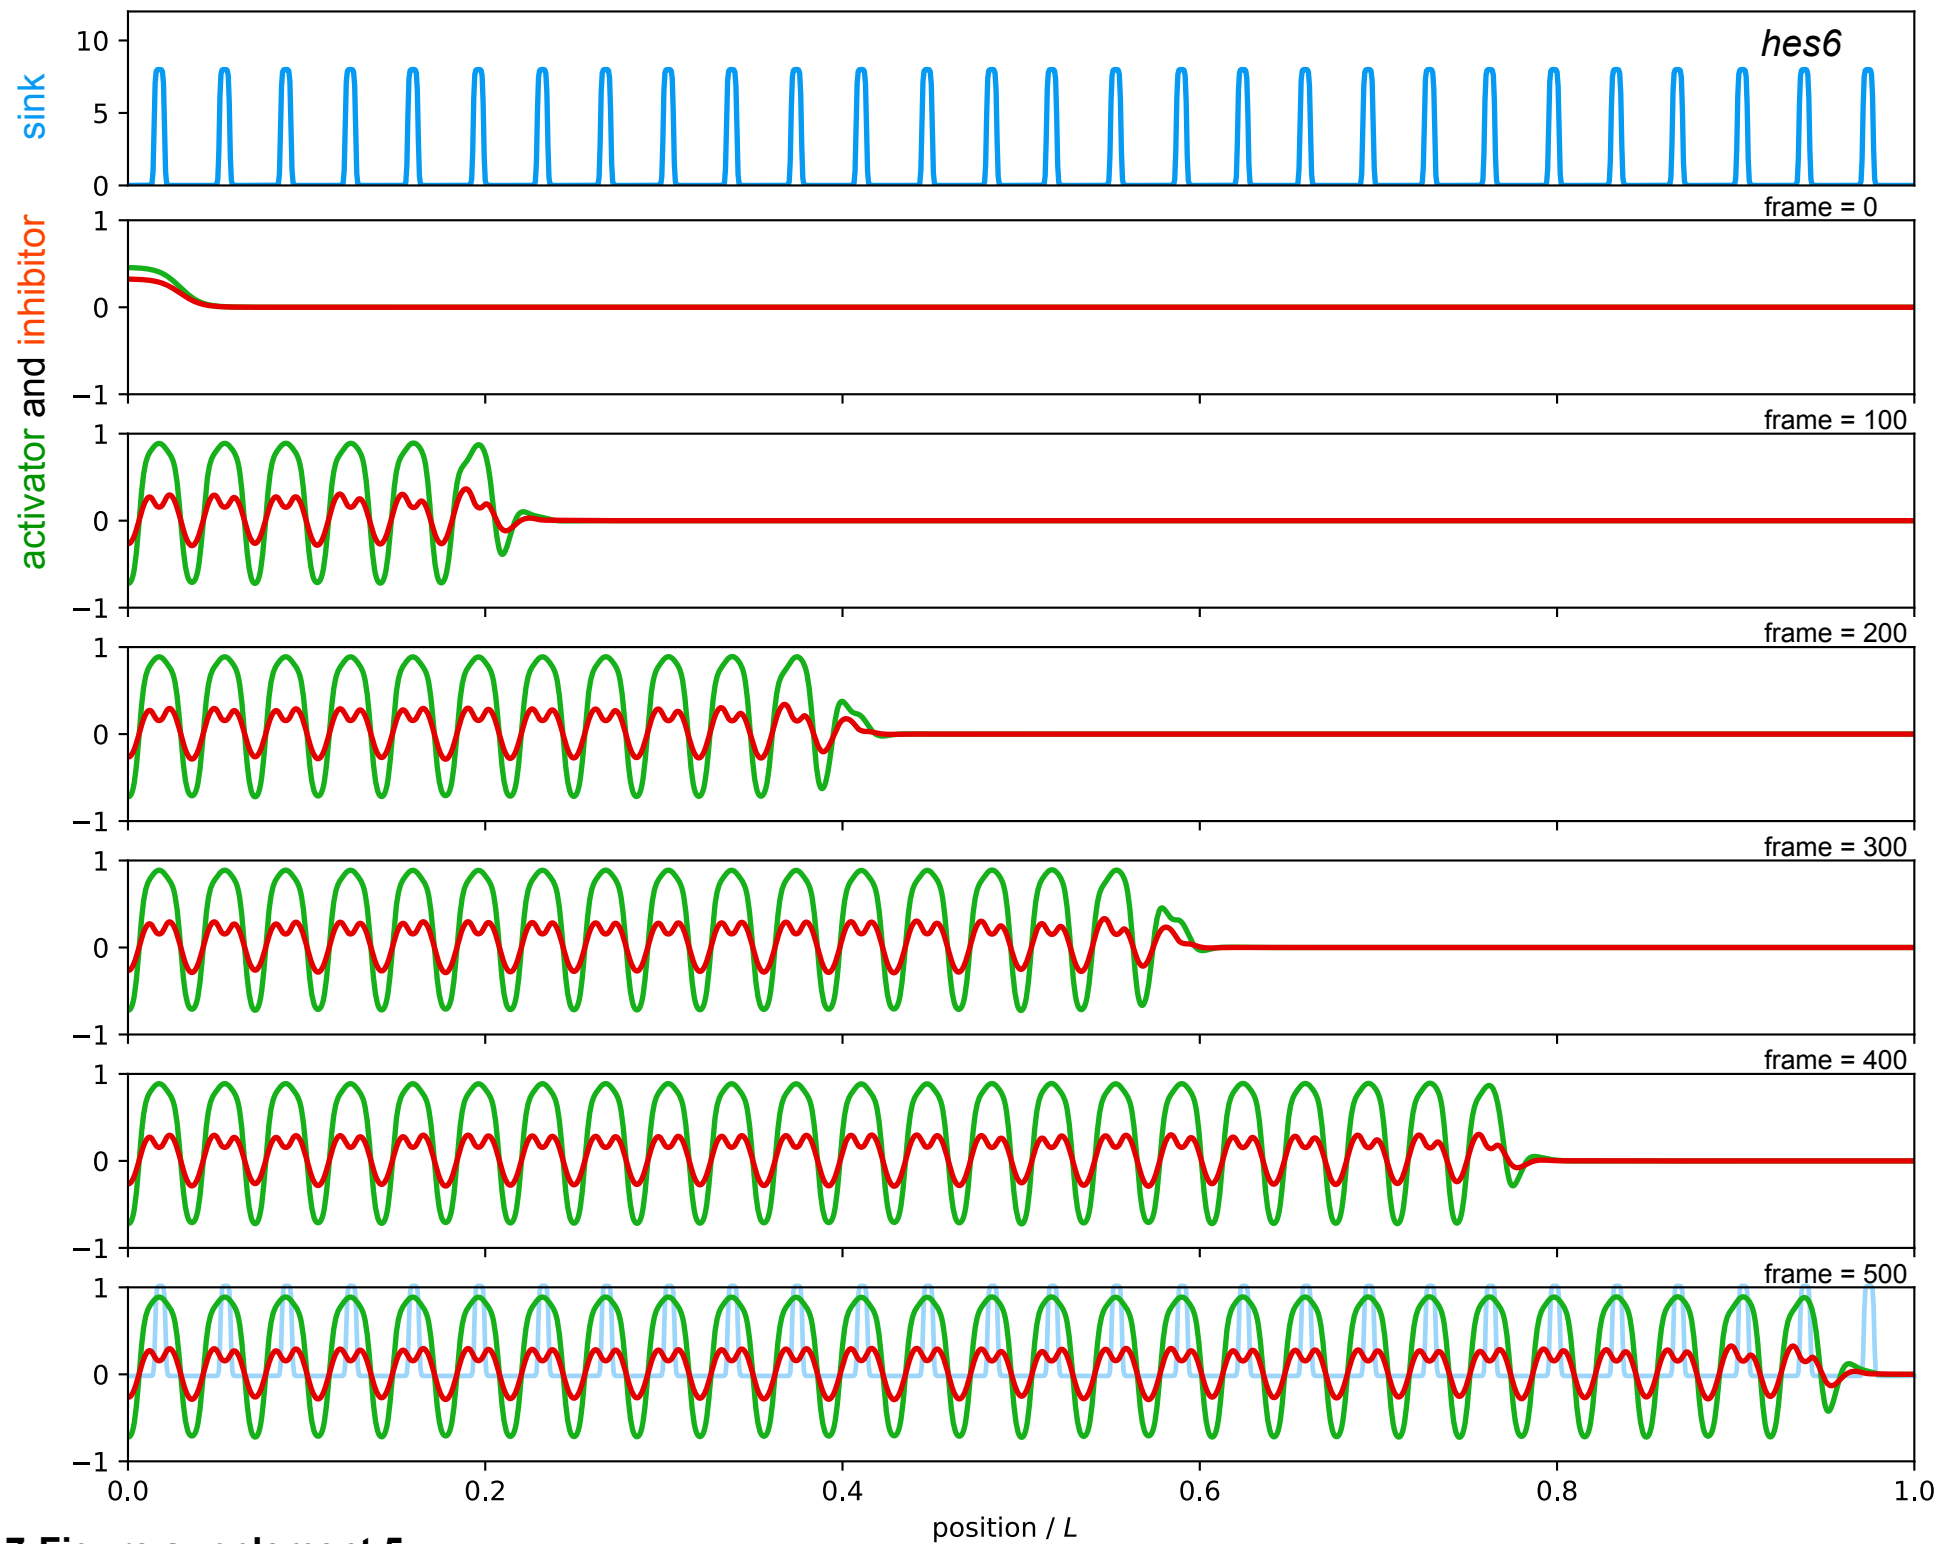

Figure 7-Figure supplement 5

Supplement: supp [file elife-33843-supp-v1.zip]

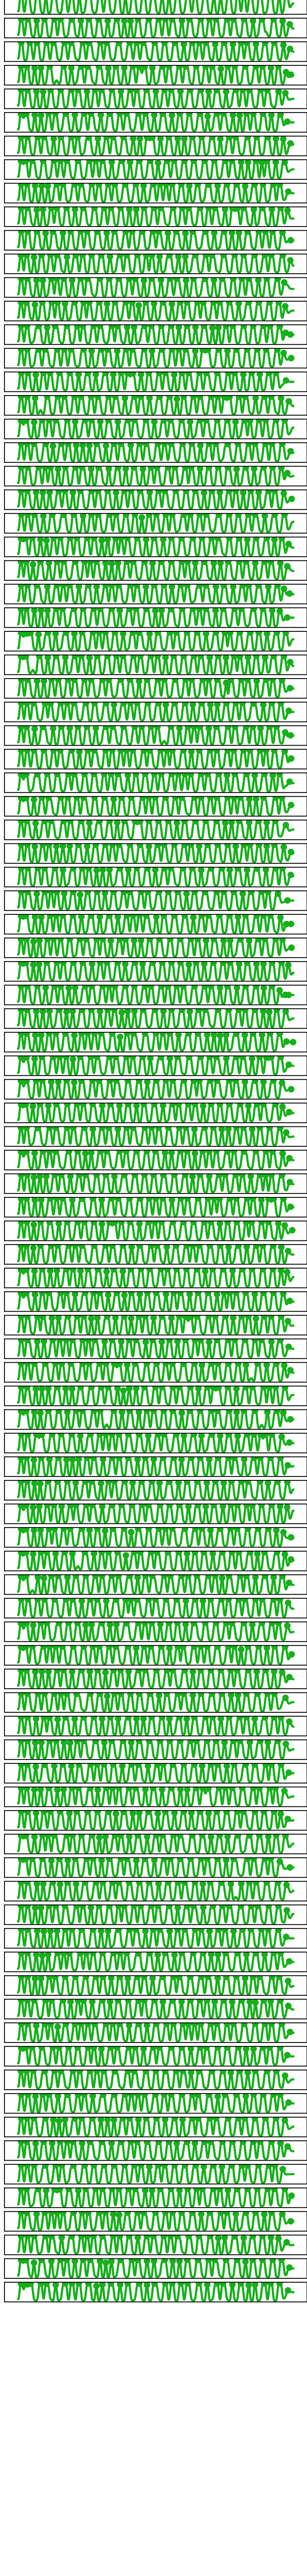

Supplement: supp [file elife-33843-supp-v1.zip]

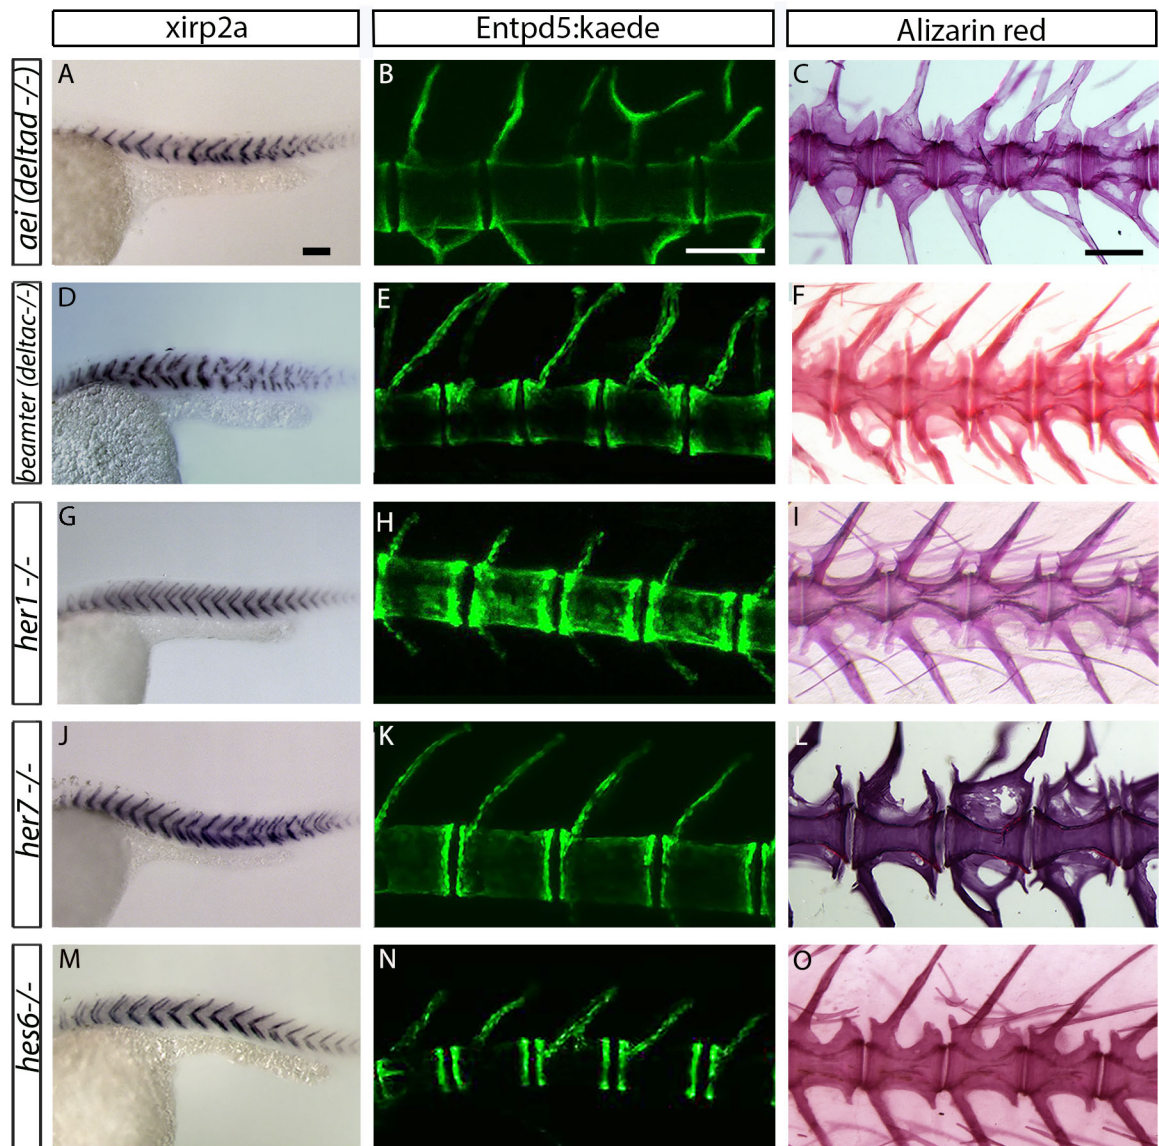

**Figure2- figure supplemnt 3**

Supplement: supp [file elife-33843-supp-v1.zip]

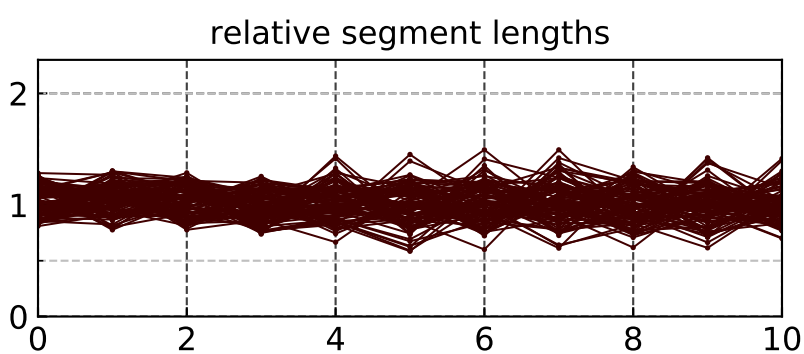

Supplement: supp [file elife-33843-supp-v1.zip]

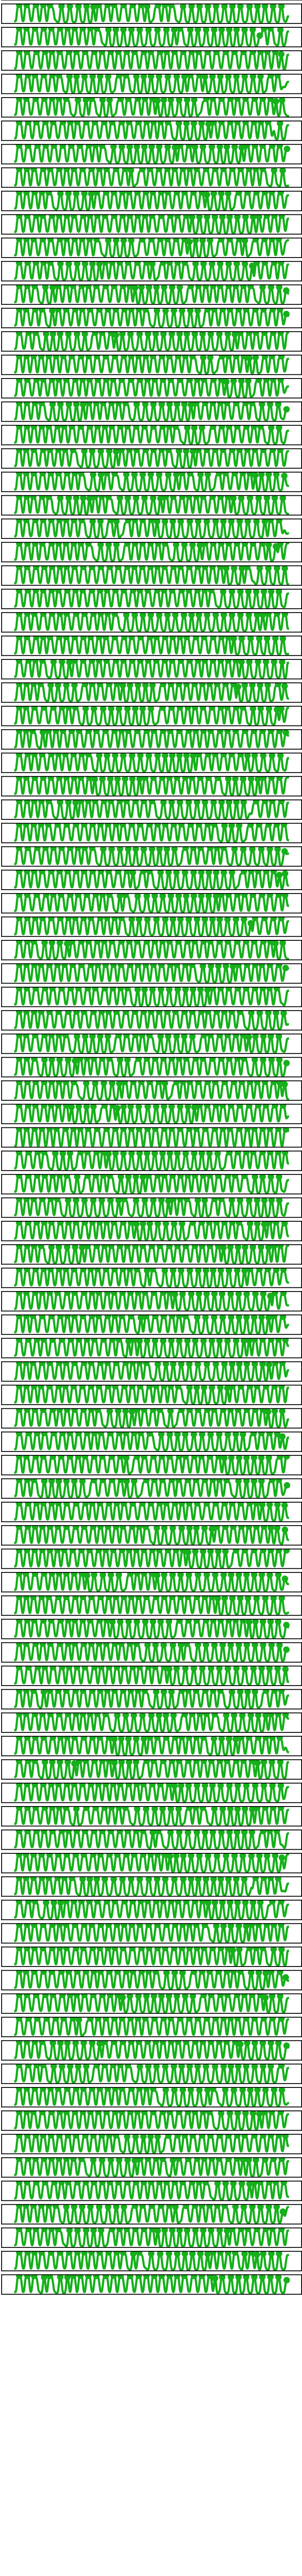

Supplement: supp [file elife-33843-supp-v1.zip]

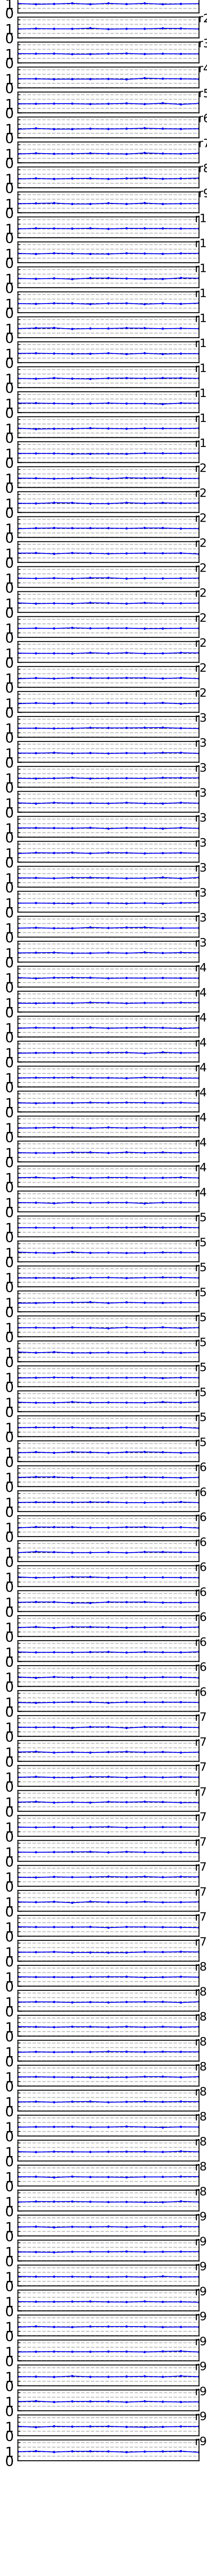

Supplement: supp [file elife-33843-supp-v1.zip]

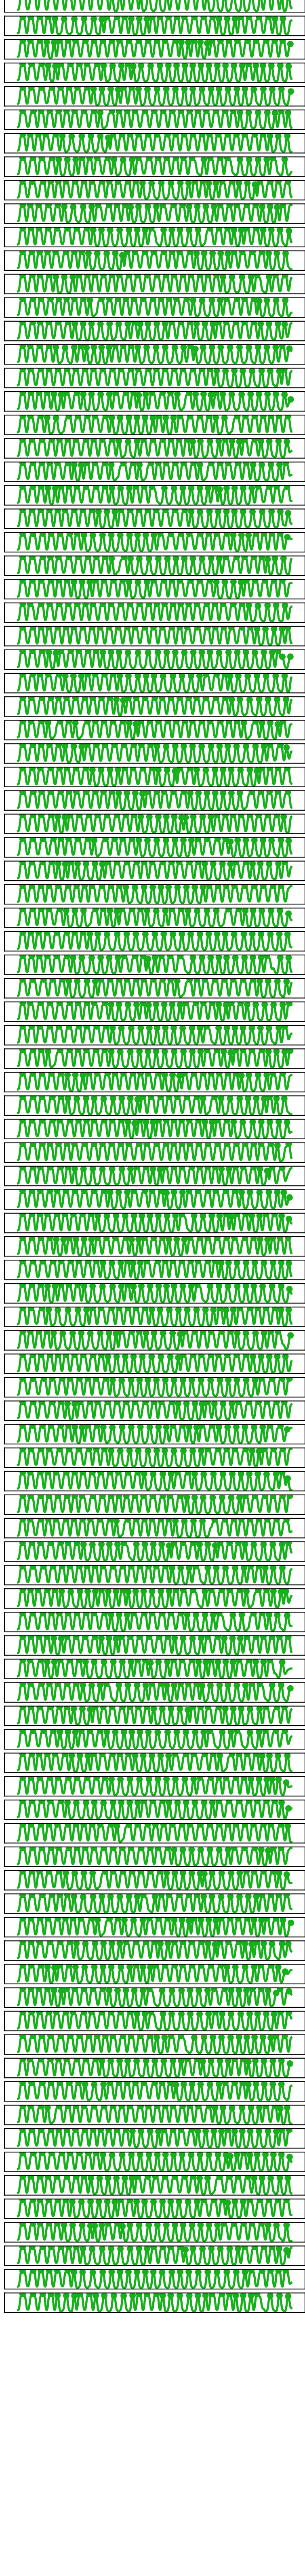

Supplement: supp [file elife-33843-supp-v1.zip]

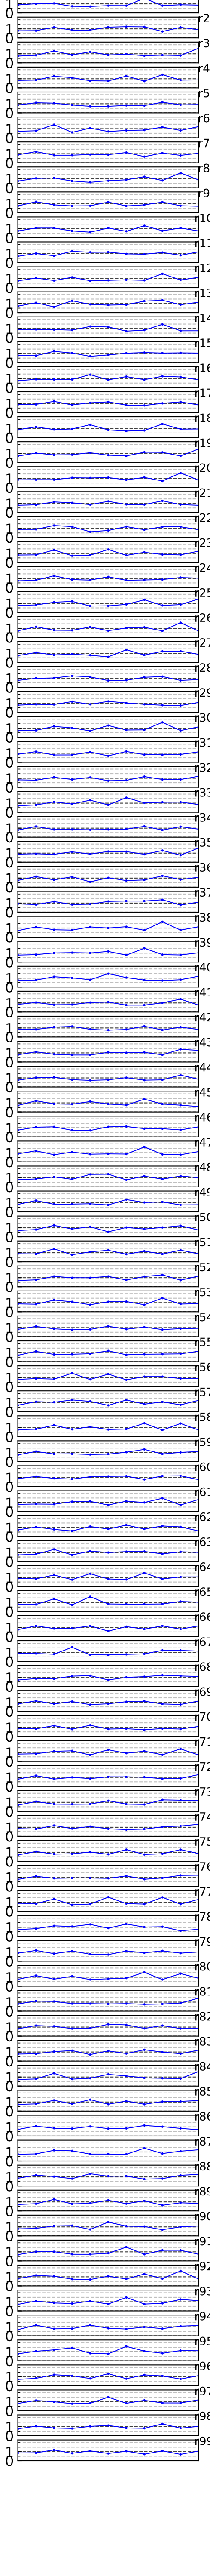

Supplement: supp [file elife-33843-supp-v1.zip]

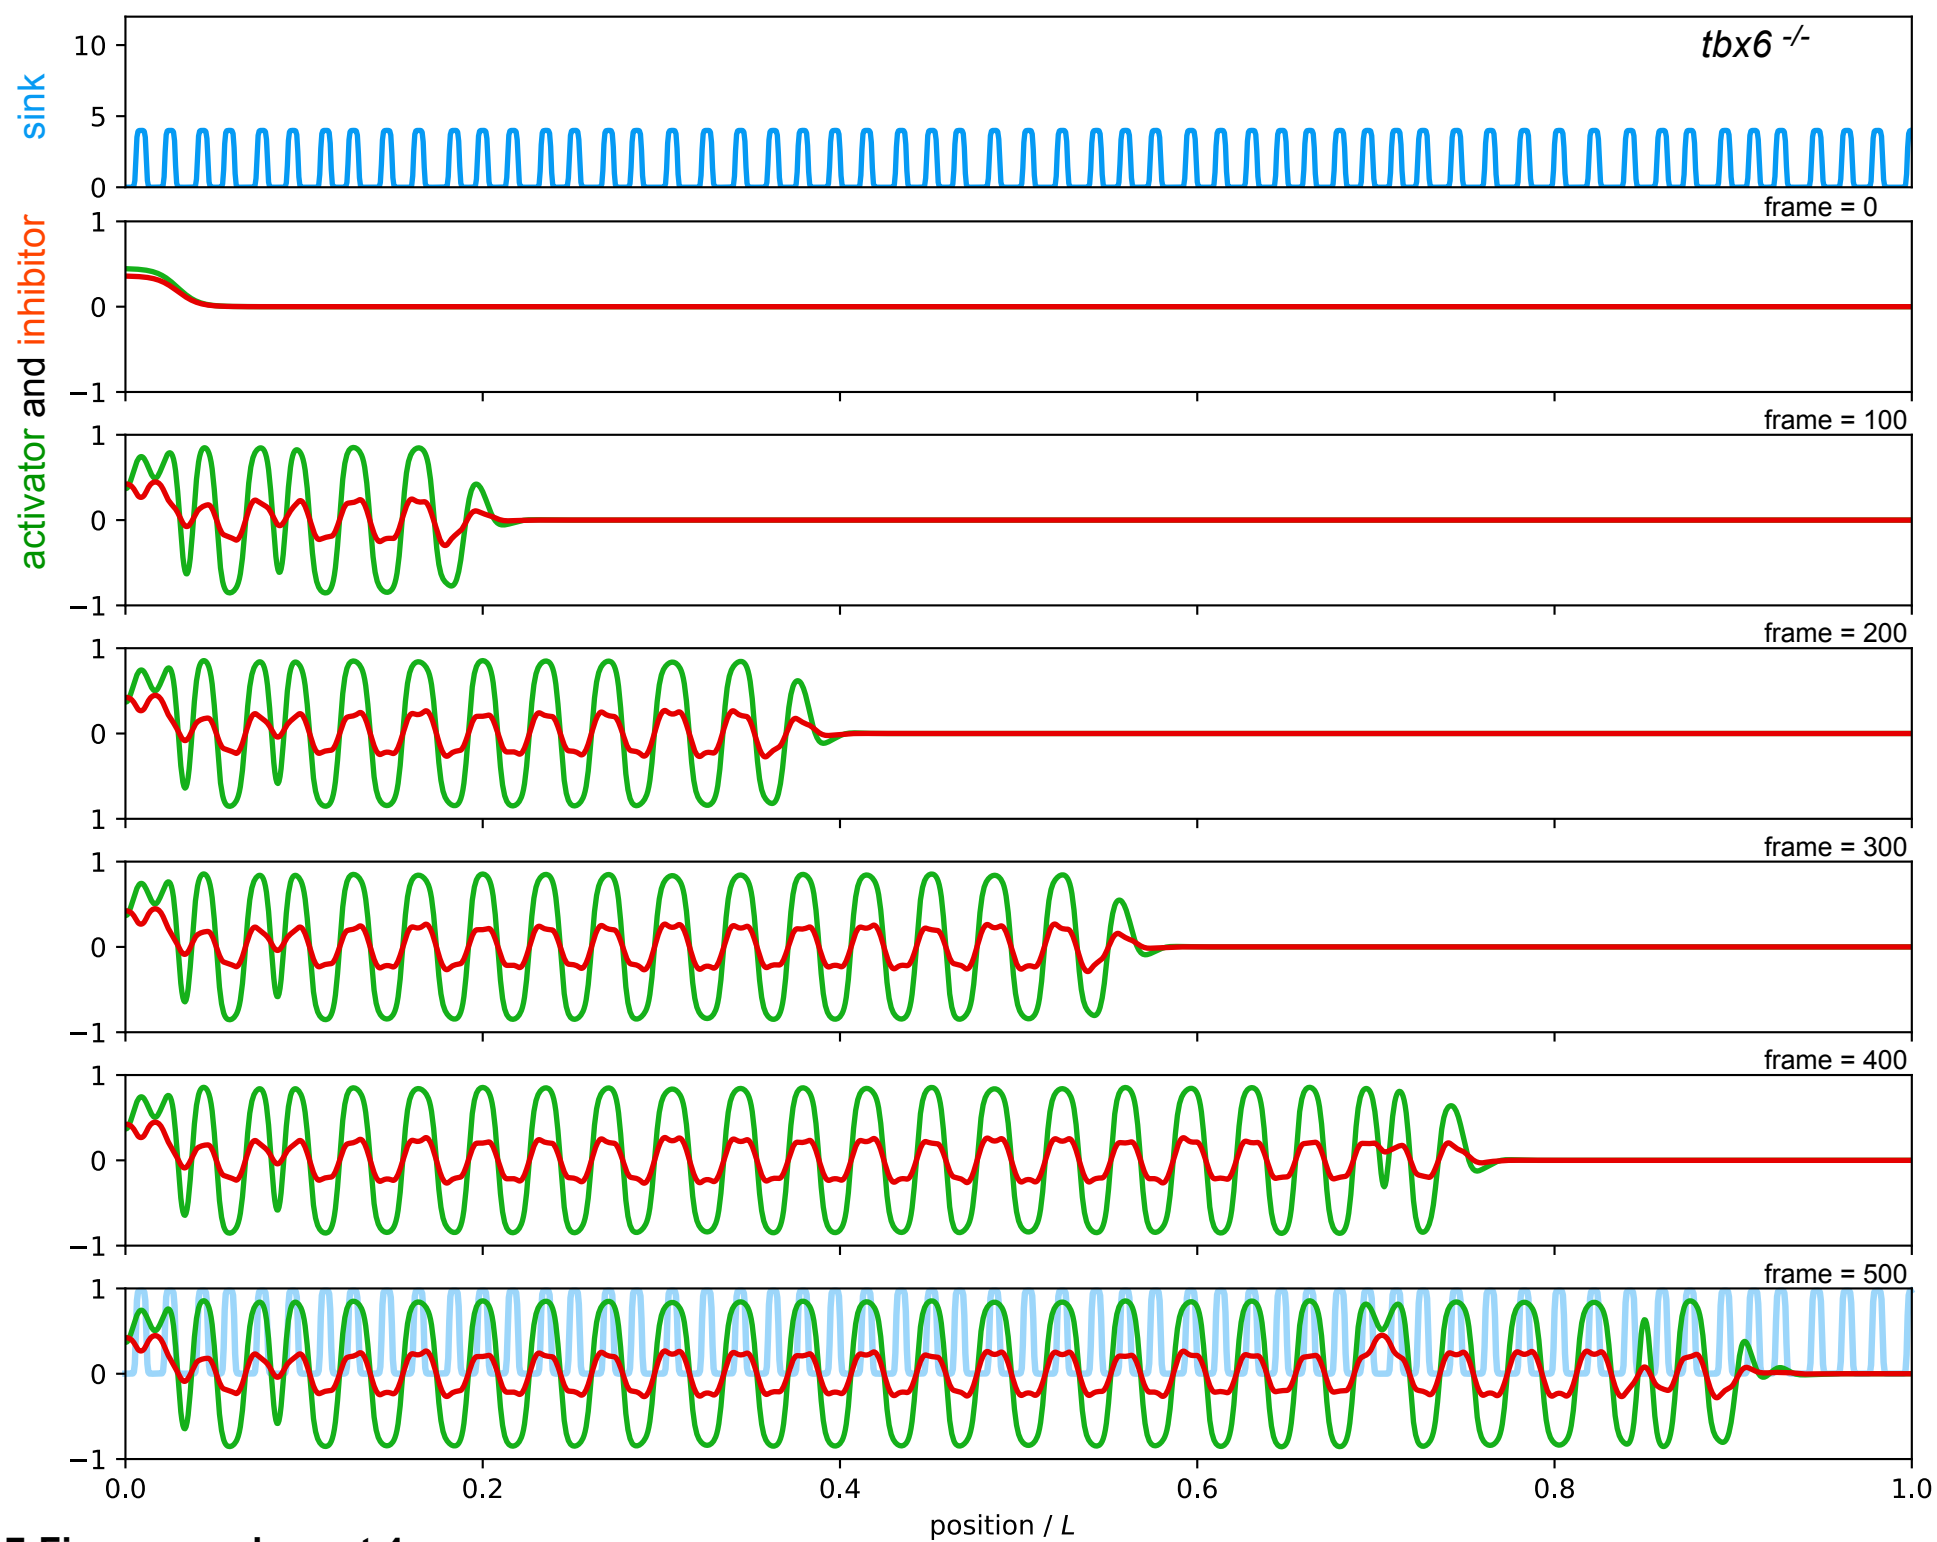

**Figure 7-Figure supplement 4**

Supplement: supp [file elife-33843-supp-v1.zip]

activator, inhibitor, sink profile concentration

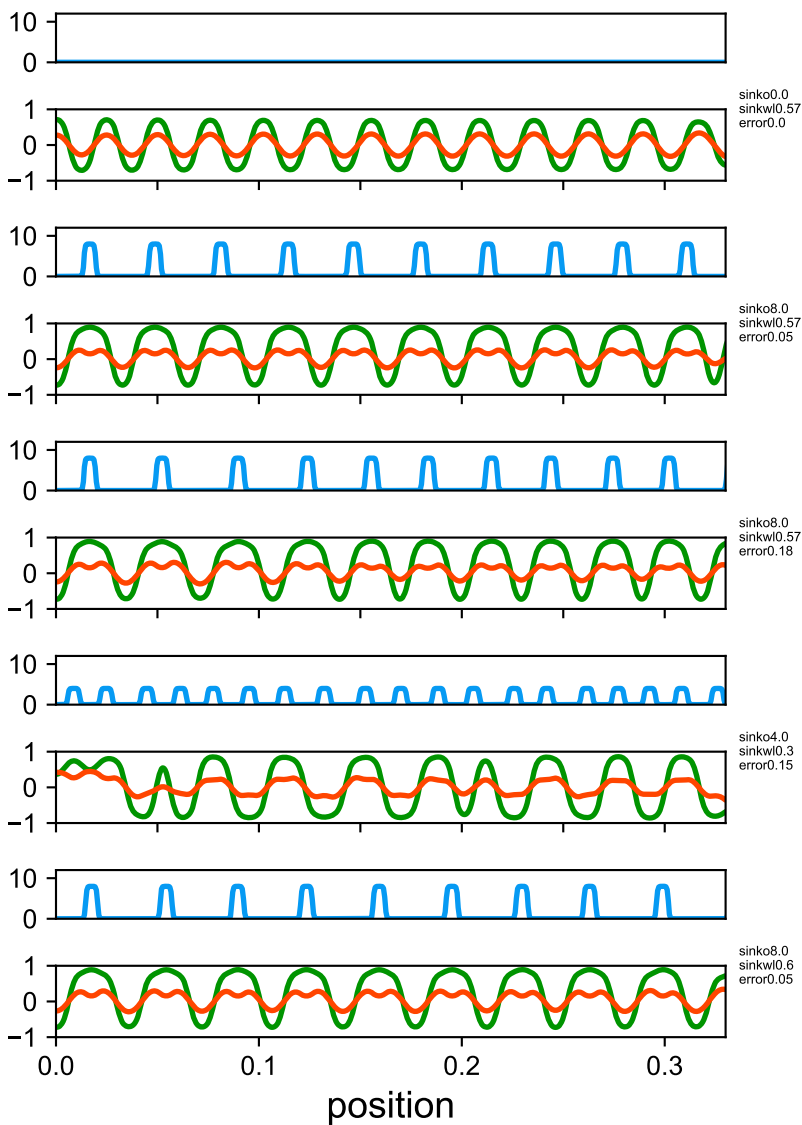

Supplement: supp [file elife-33843-supp-v1.zip]

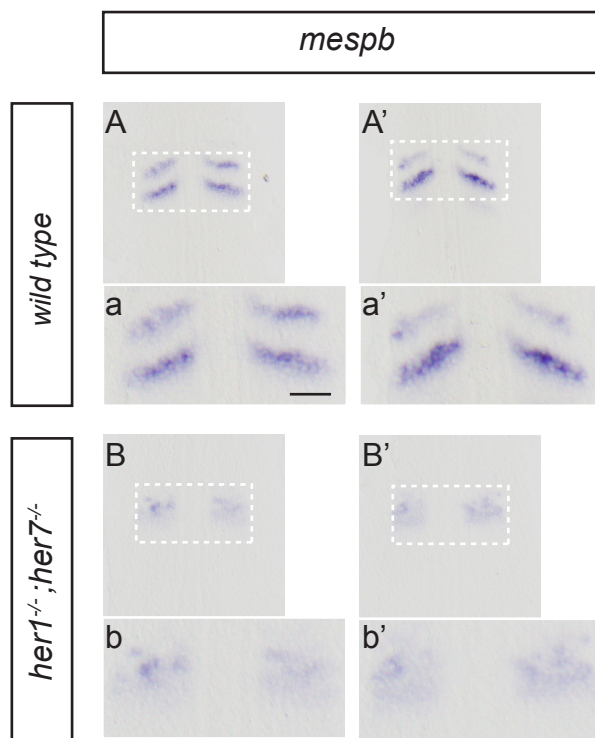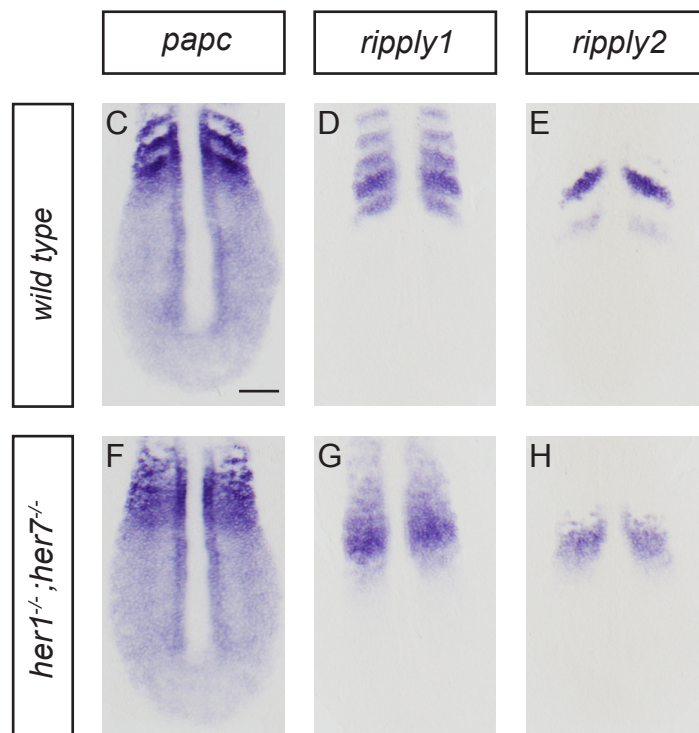

Figure 1 Supplement 3

Supplement: supp [file elife-33843-supp-v1.zip]

relative segment lengths

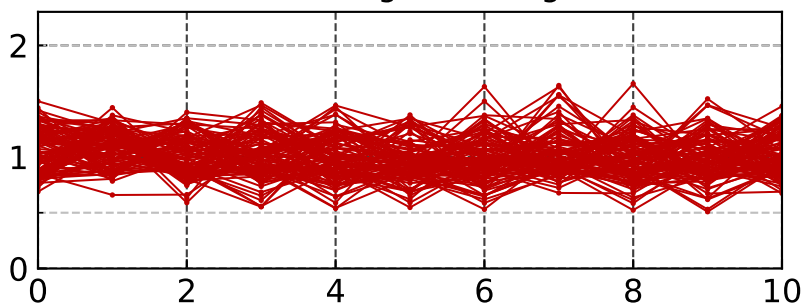

Supplement: supp [file elife-33843-supp-v1.zip]

activator, inhibitor, sink profile concentration

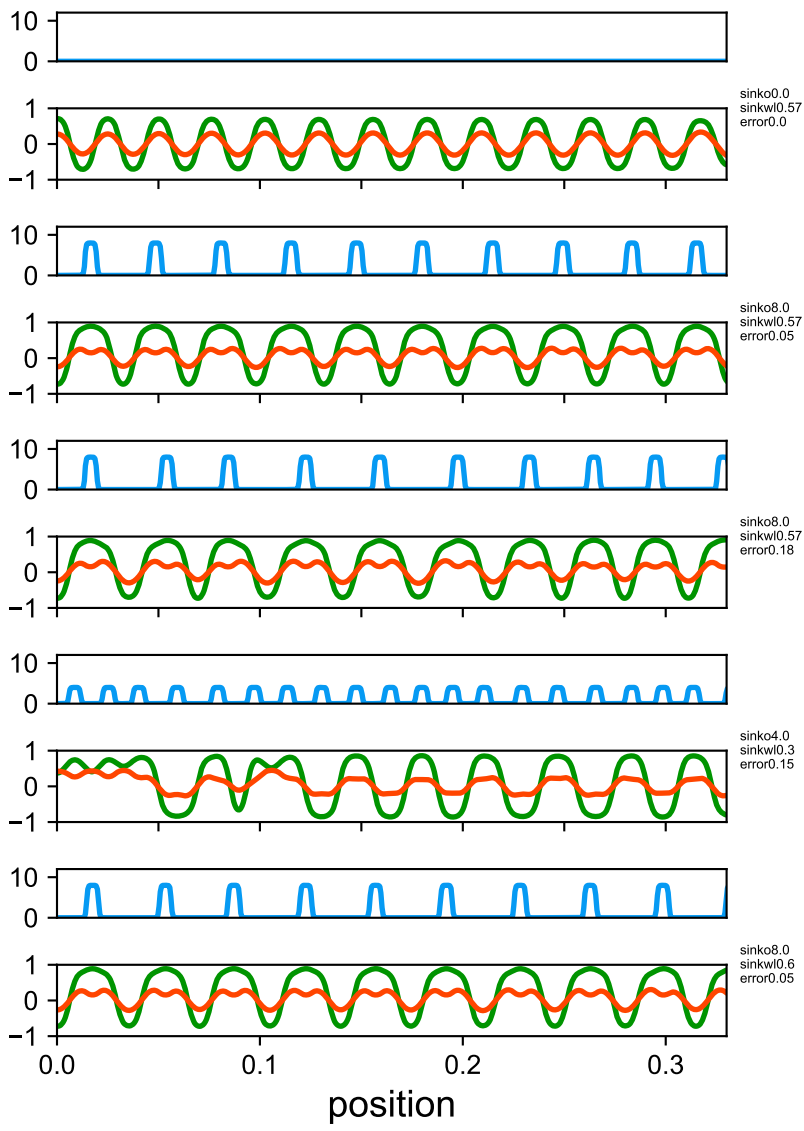

Supplement: supp [file elife-33843-supp-v1.zip]

# Histogram of peak counts

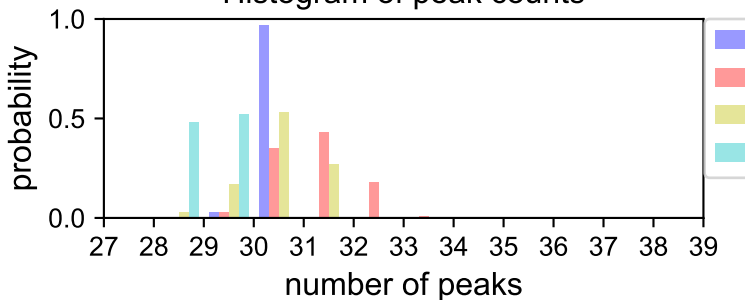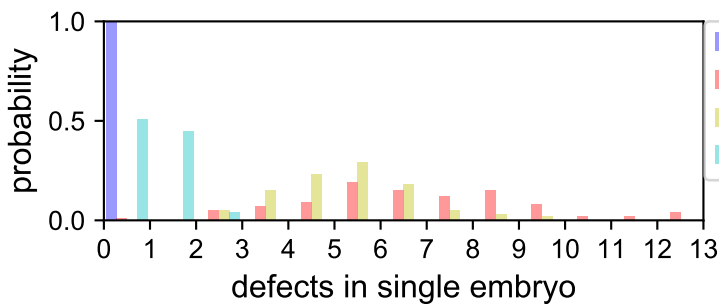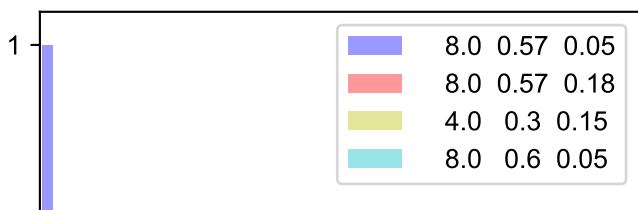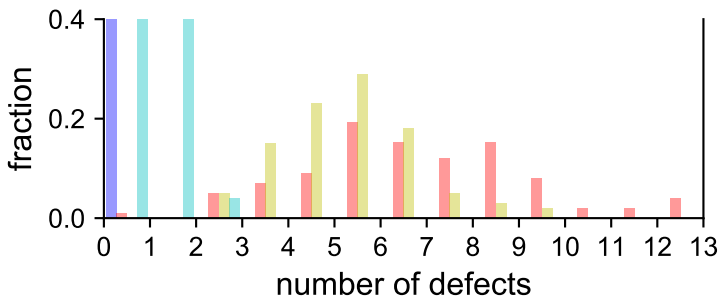

Supplement: supp [file elife-33843-supp-v1.zip]

activator, inhibitor, sink profile concentration

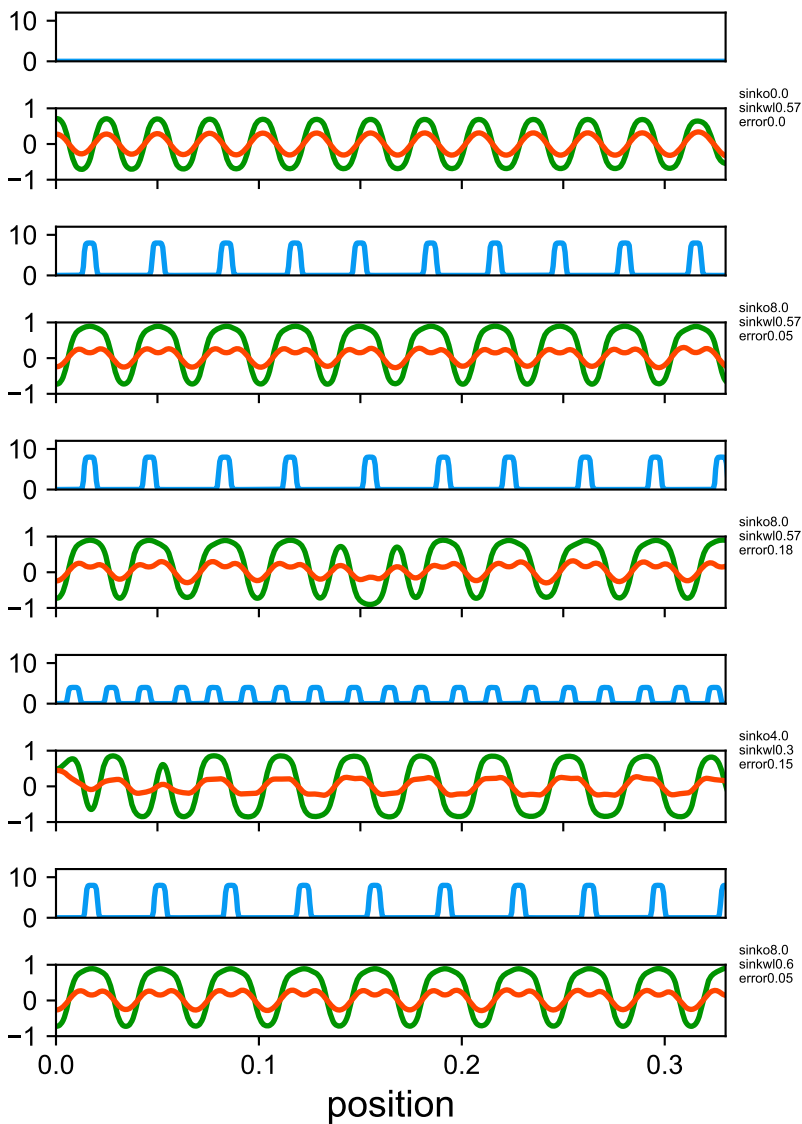

Supplement: supp [file elife-33843-supp-v1.zip]

# Histogram of peak counts

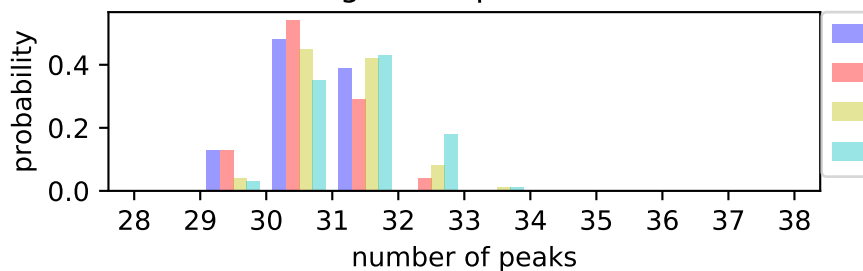

# Histogram of defects per embryo

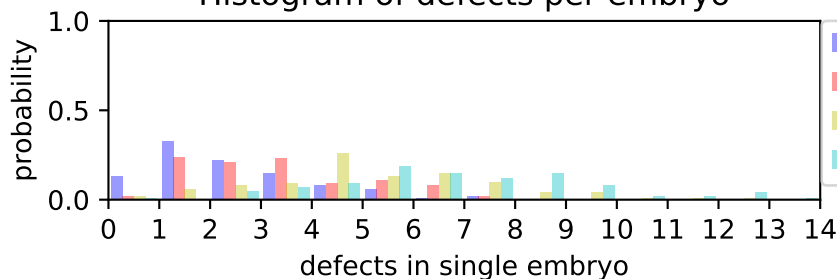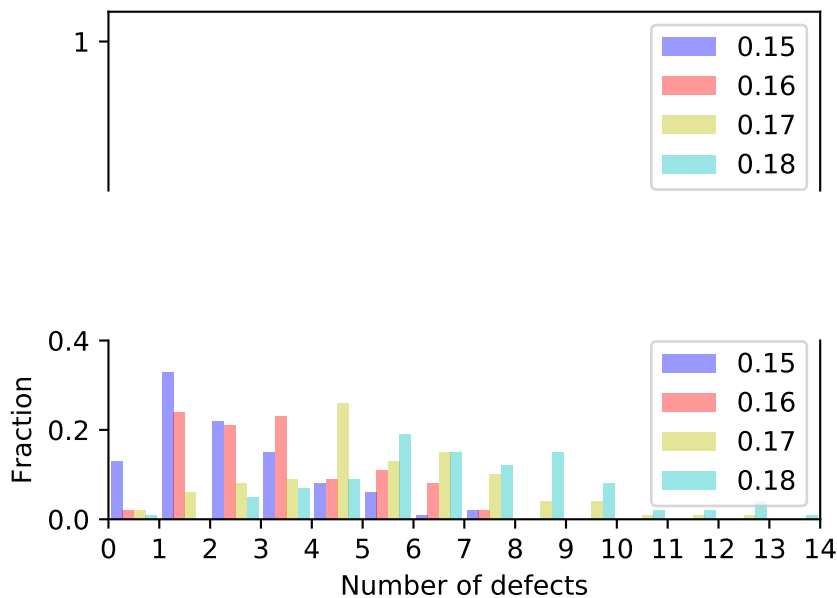

Supplement: supp [file elife-33843-supp-v1.zip]

activator, inhibitor, sink profile concentration

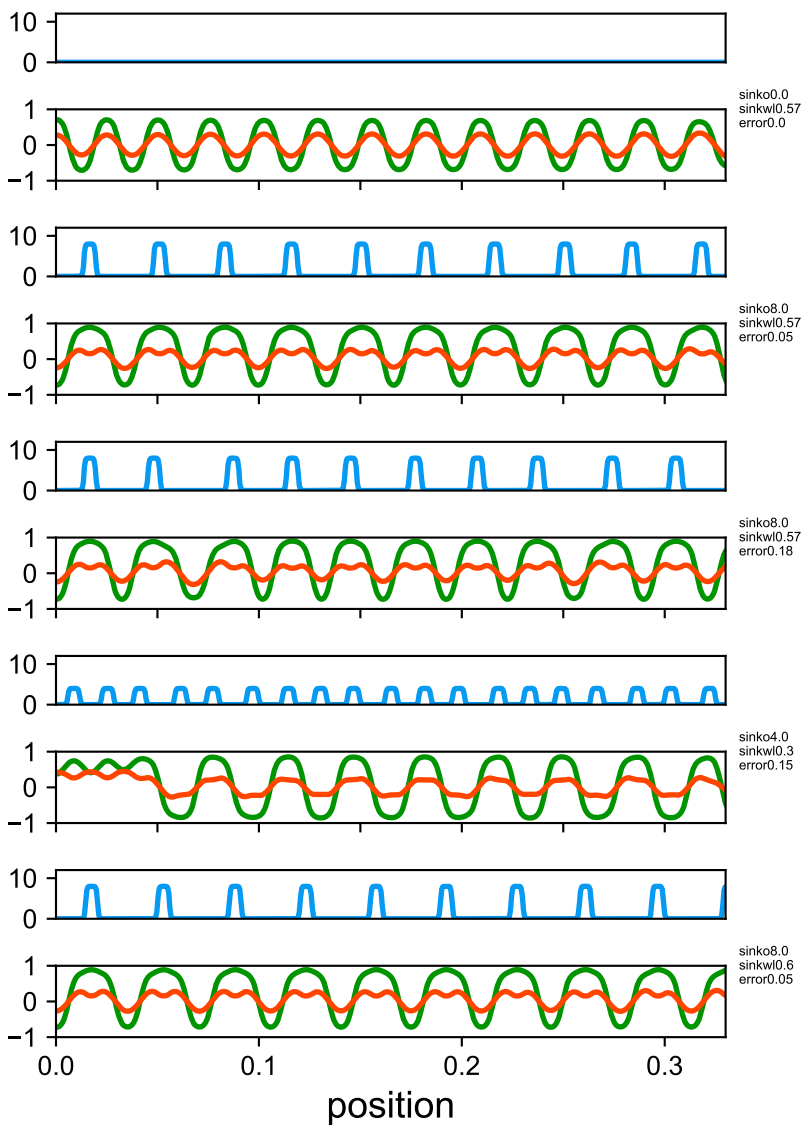

Supplement: supp [file elife-33843-supp-v1.zip]

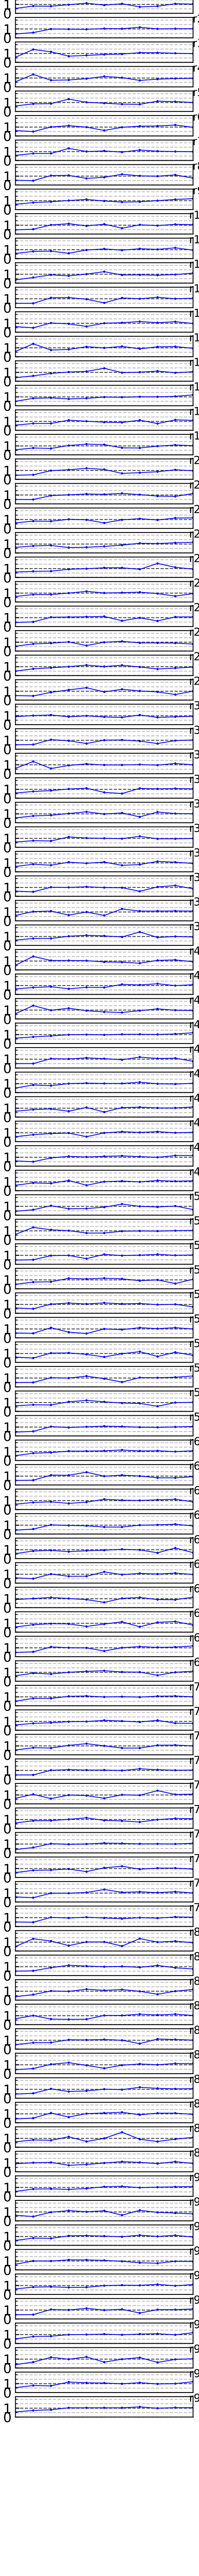

Supplement: supp [file elife-33843-supp-v1.zip]

activator, inhibitor, sink profile concentration

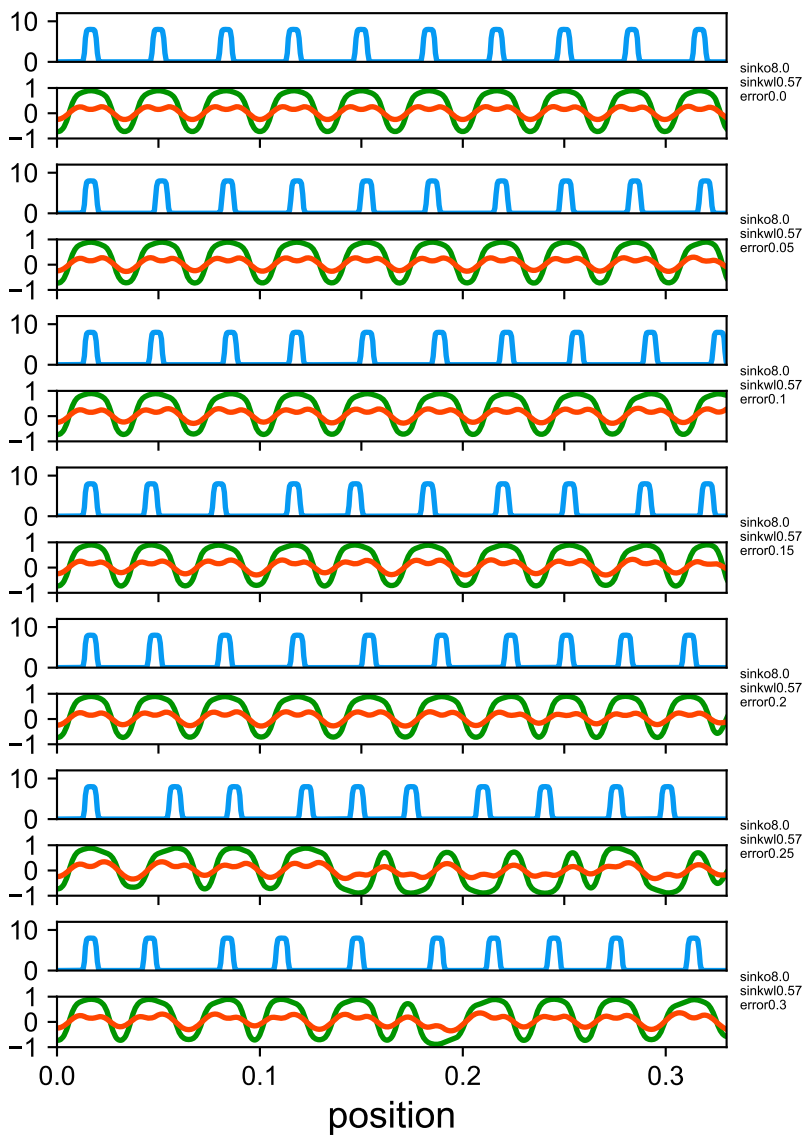

Supplement: supp [file elife-33843-supp-v1.zip]

# Histogram of peak counts

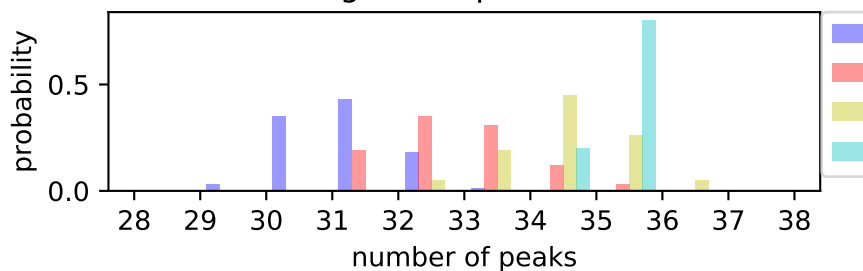

# Histogram of defects per embryo

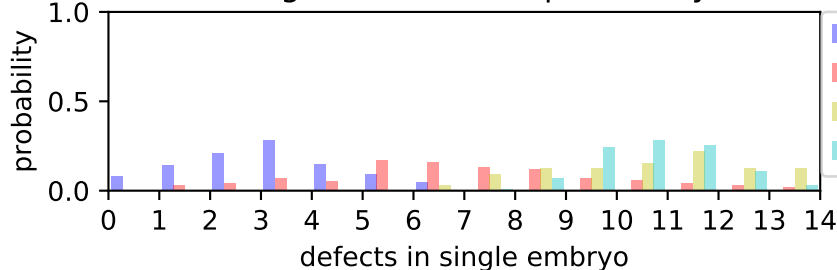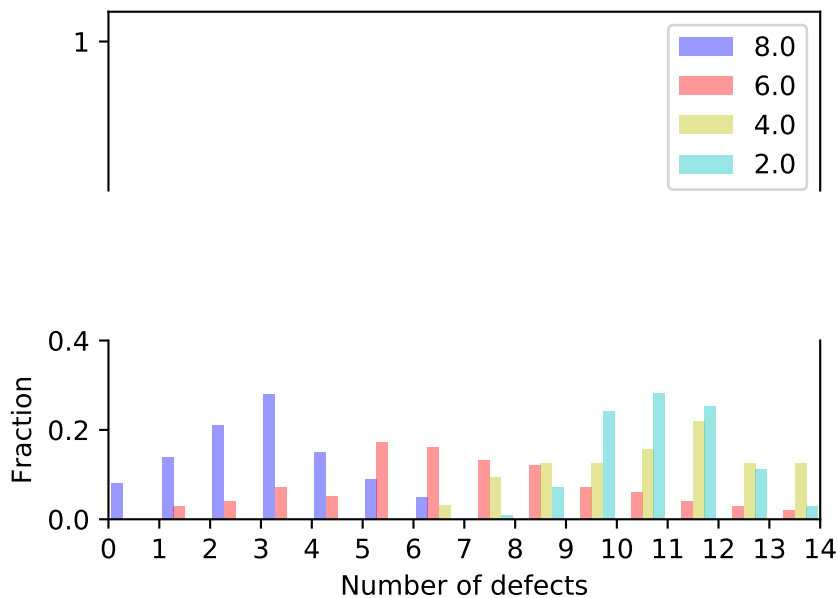

Supplement: supp [file elife-33843-supp-v1.zip]

**wild type**

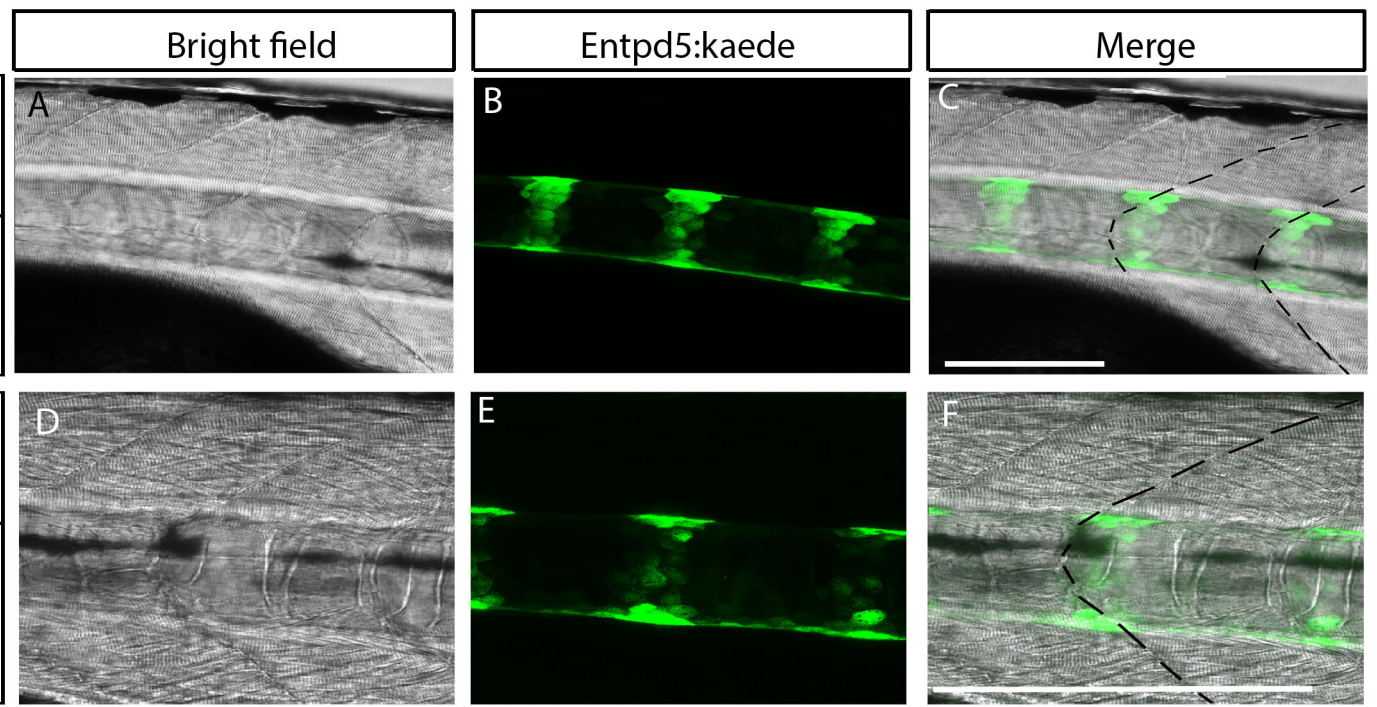

***her1-/-;her7-/-***

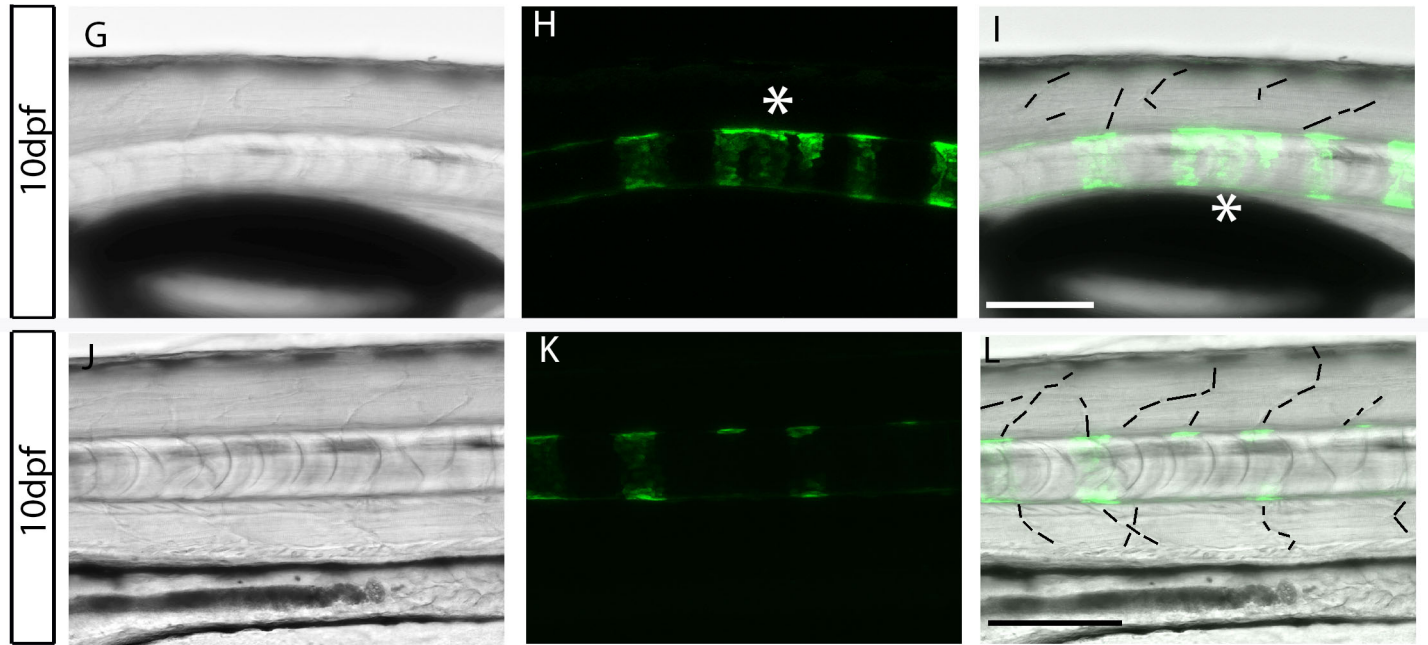

***fss (tbx6-/-)***

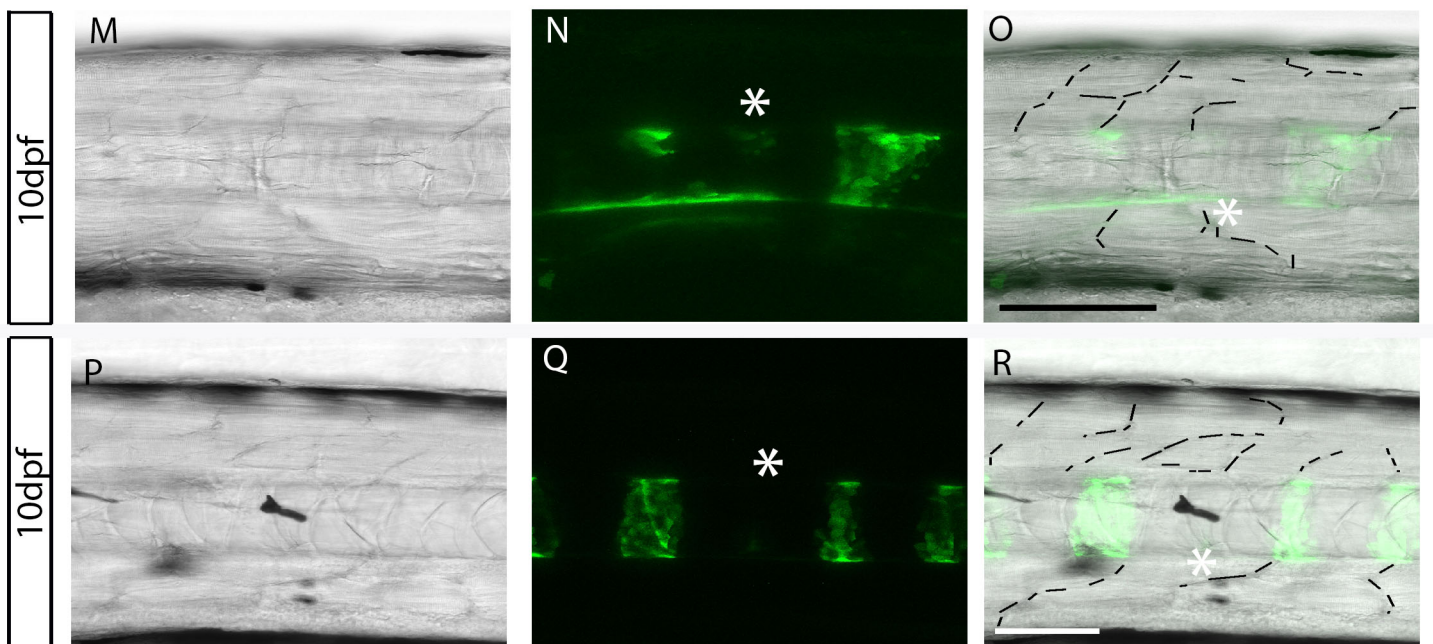

**Figure 7- figure supplement 7**

Supplement: supp [file elife-33843-supp-v1.zip]

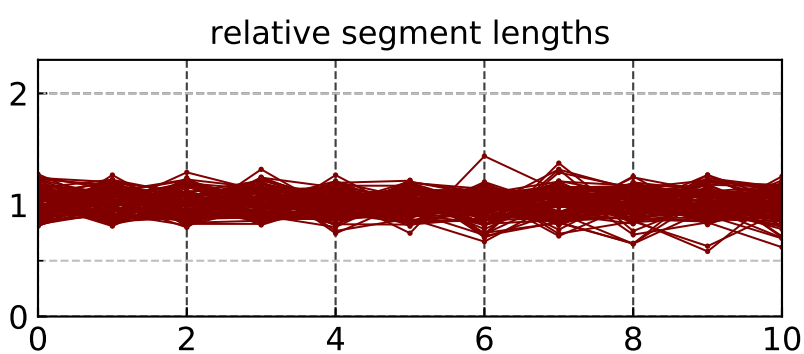

Supplement: supp [file elife-33843-supp-v1.zip]

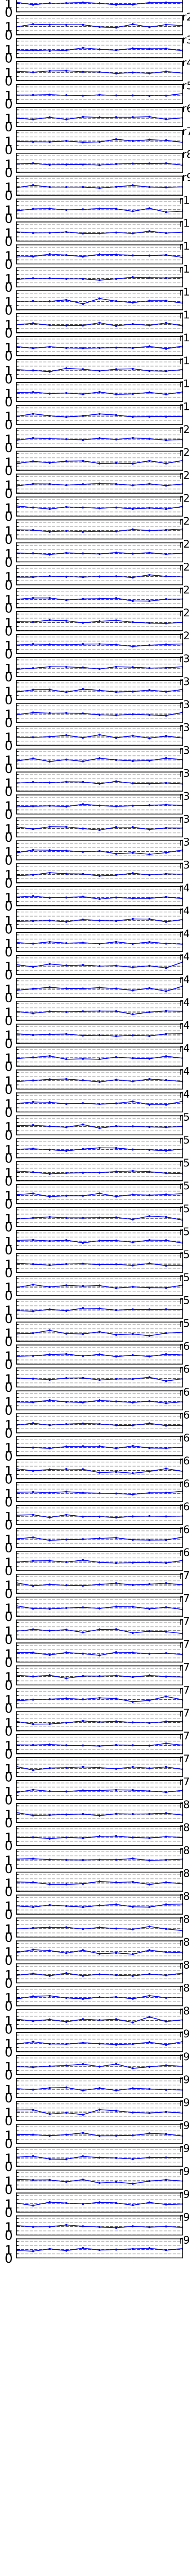

Supplement: supp [file elife-33843-supp-v1.zip]

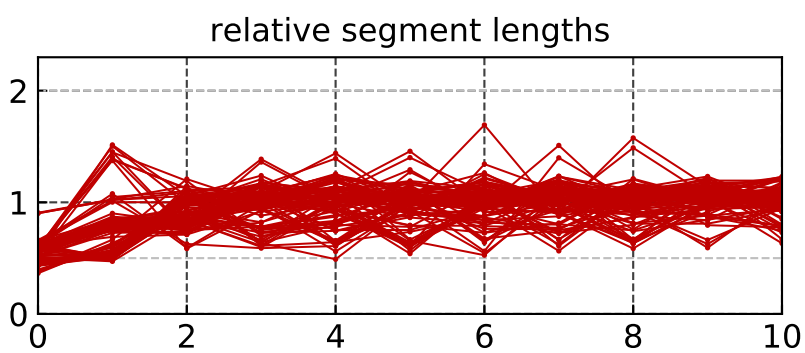

Supplement: supp [file elife-33843-supp-v1.zip]

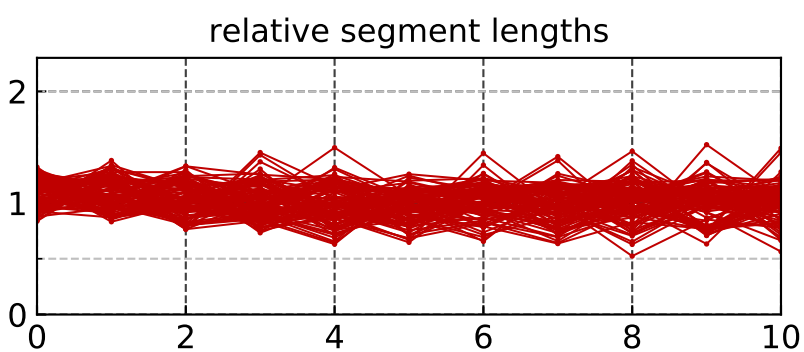

Supplement: supp [file elife-33843-supp-v1.zip]

# Histogram of peak counts

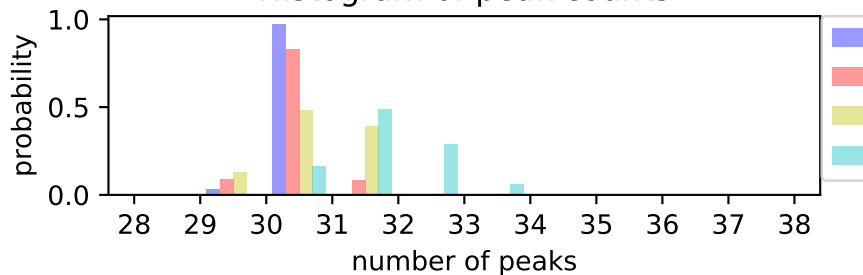

# Histogram of defects per embryo

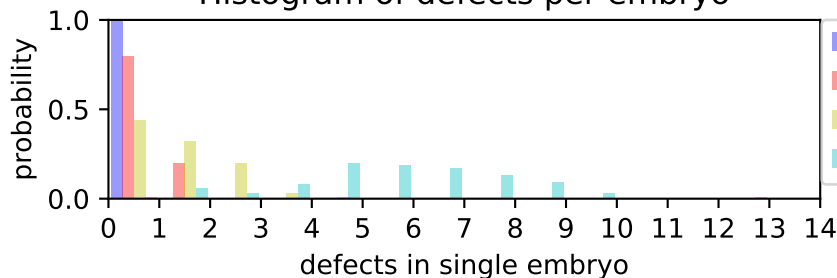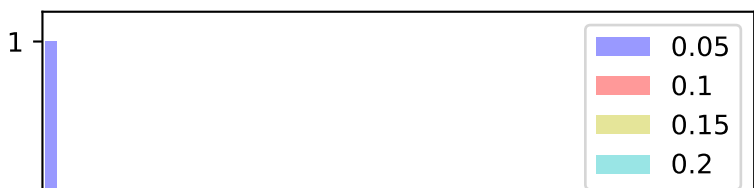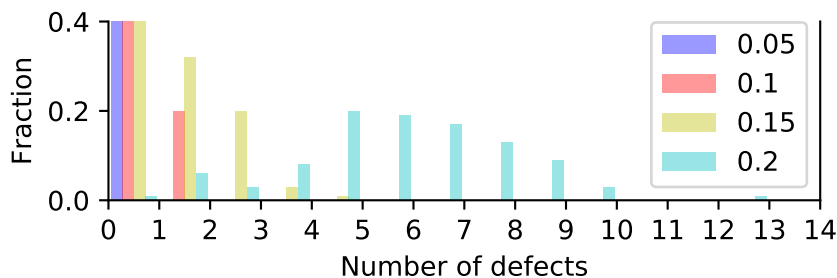

Supplement: supp [file elife-33843-supp-v1.zip]

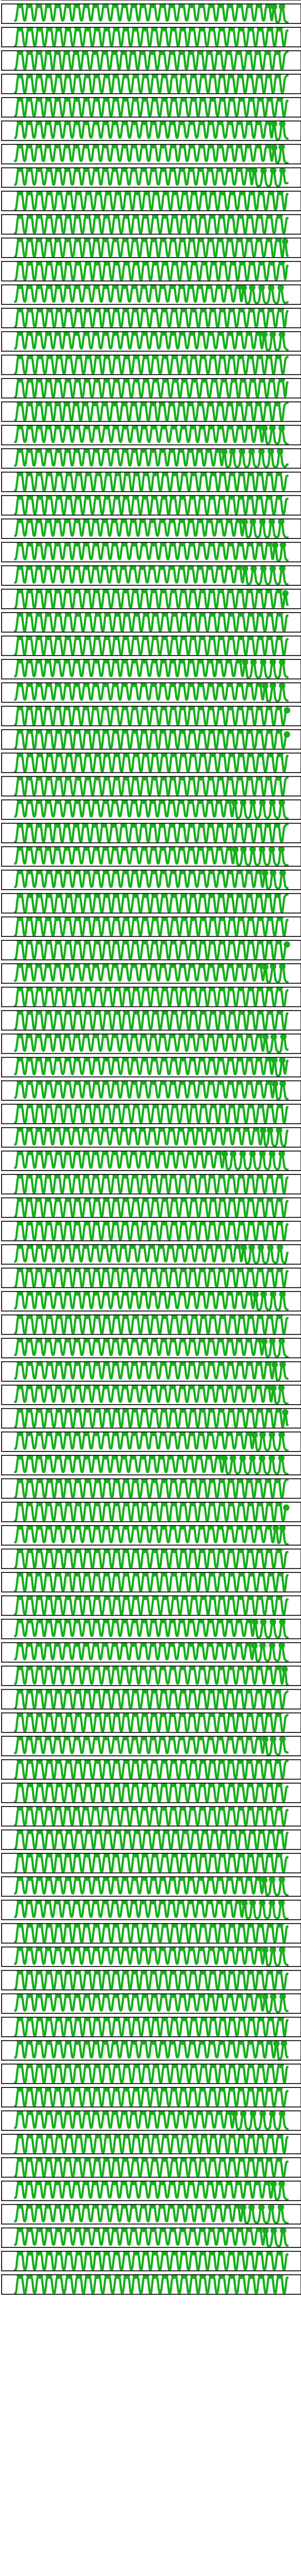

Supplement: supp [file elife-33843-supp-v1.zip]

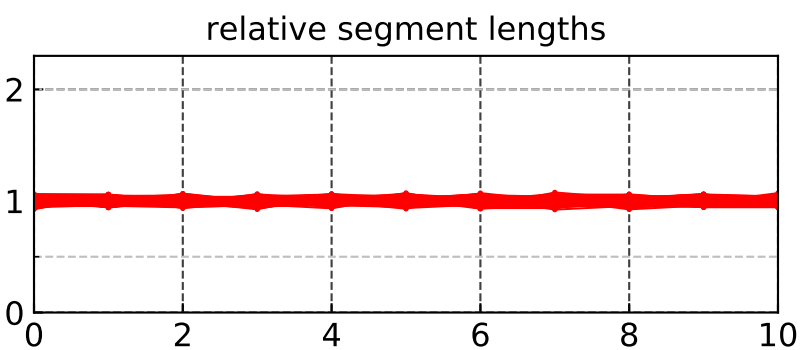

Supplement: supp [file elife-33843-supp-v1.zip]

activator, inhibitor, sink profile concentration

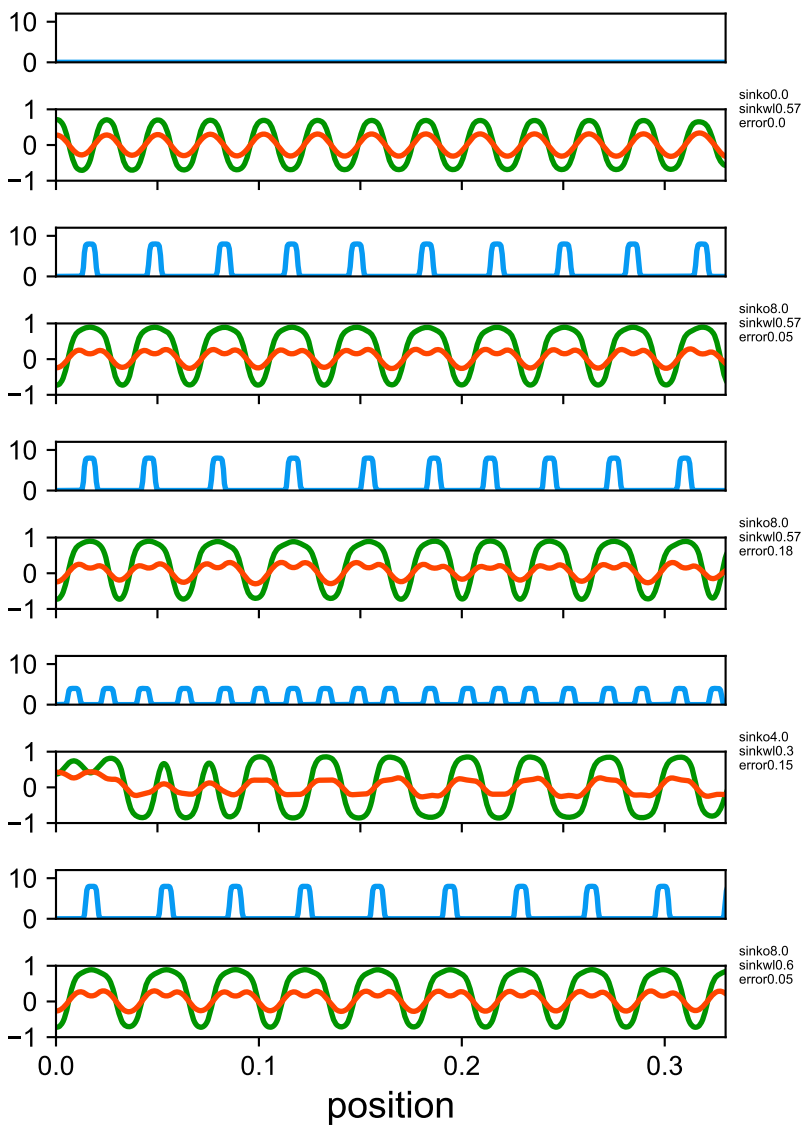

Supplement: supp [file elife-33843-supp-v1.zip]

normalized segment lengths

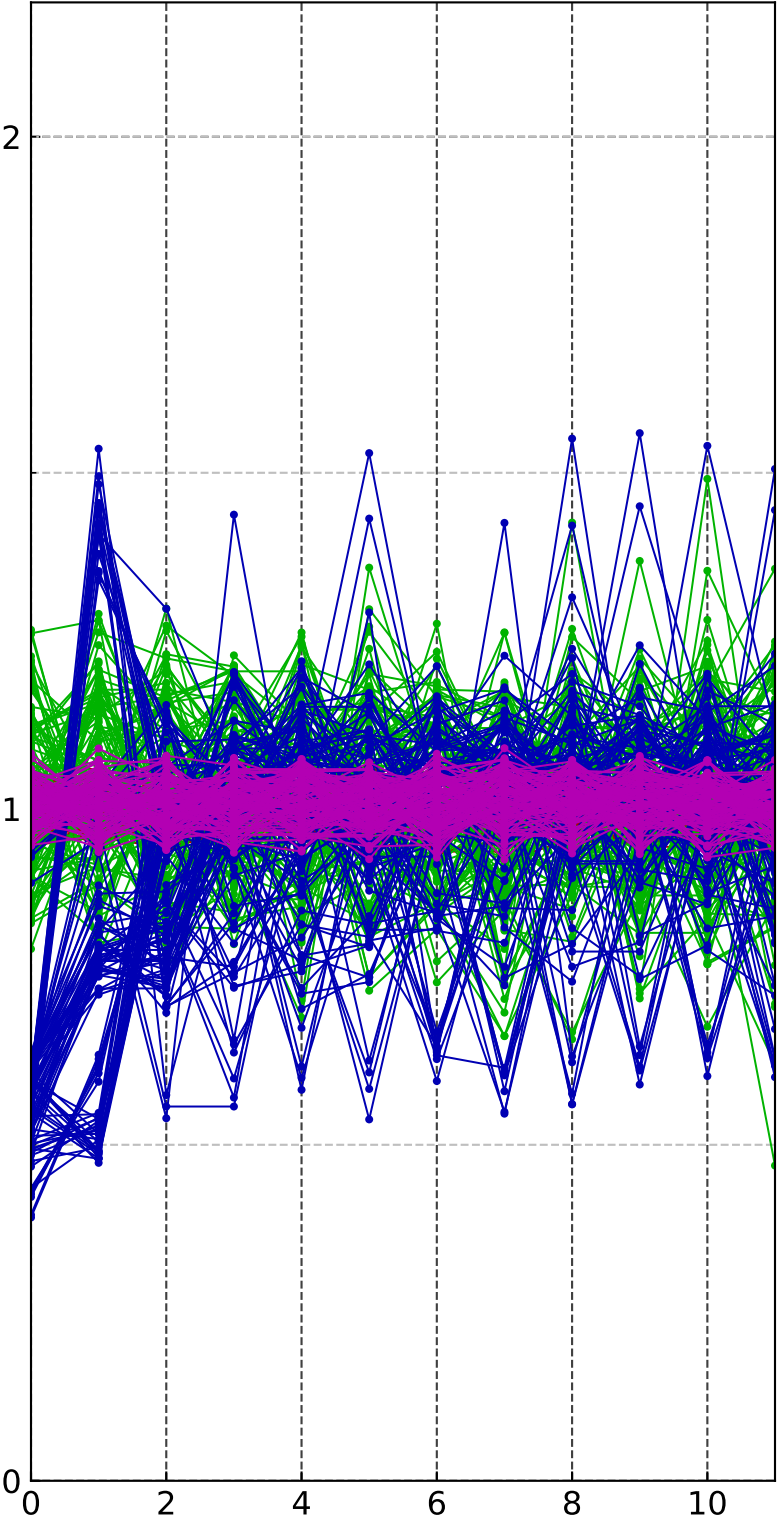

Supplement: supp [file elife-33843-supp-v1.zip]

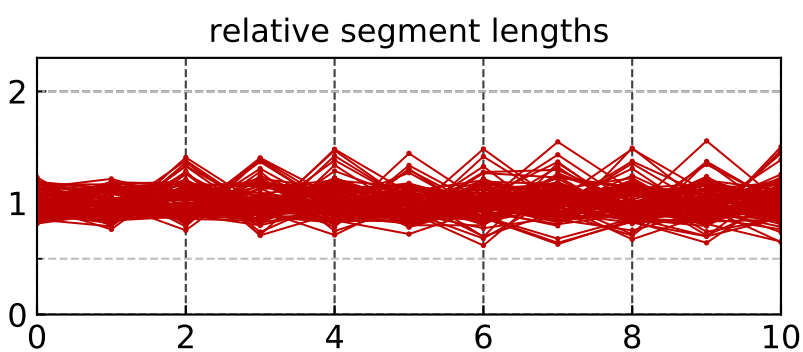

Supplement: supp [file elife-33843-supp-v1.zip]

relative segment lengths

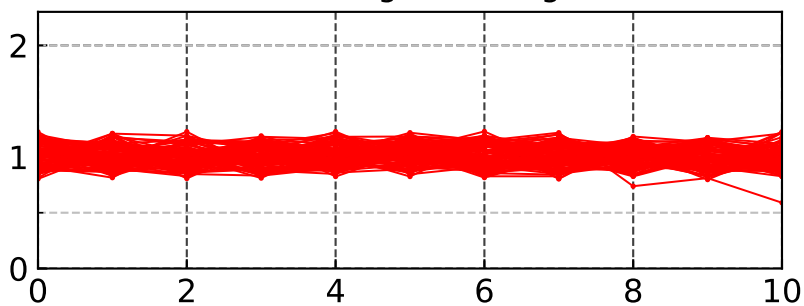

Supplement: supp [file elife-33843-supp-v1.zip]

relative segment lengths

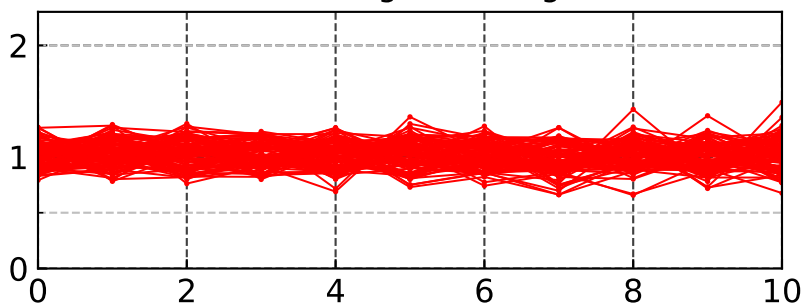

Supplement: supp [file elife-33843-supp-v1.zip]

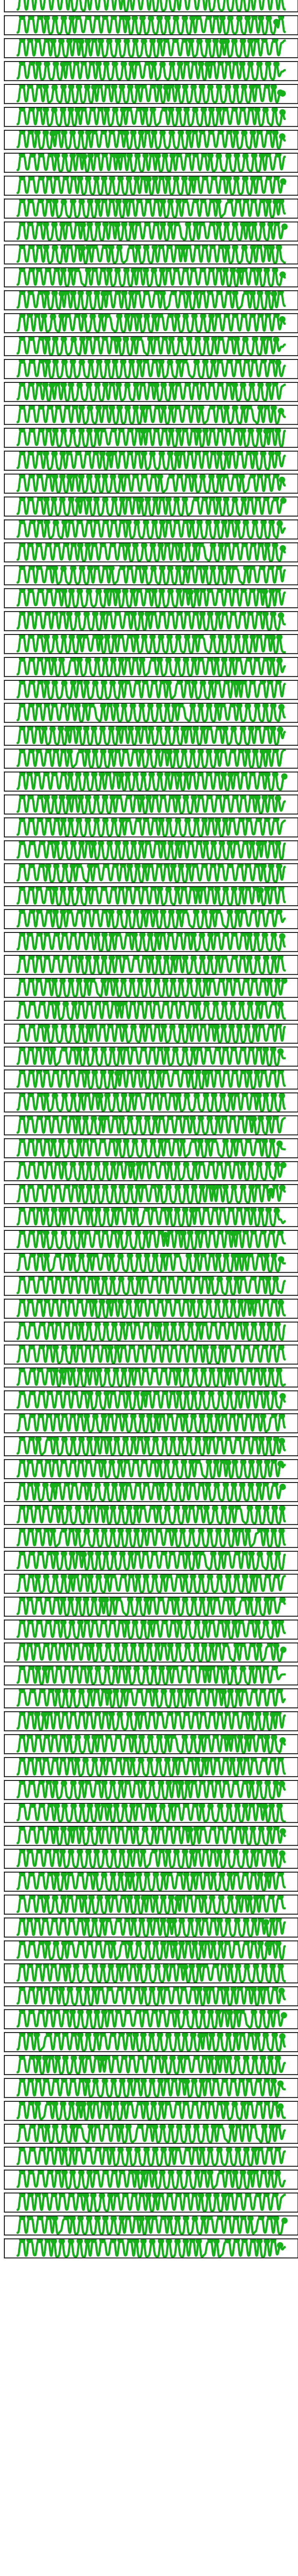

Supplement: supp [file elife-33843-supp-v1.zip]

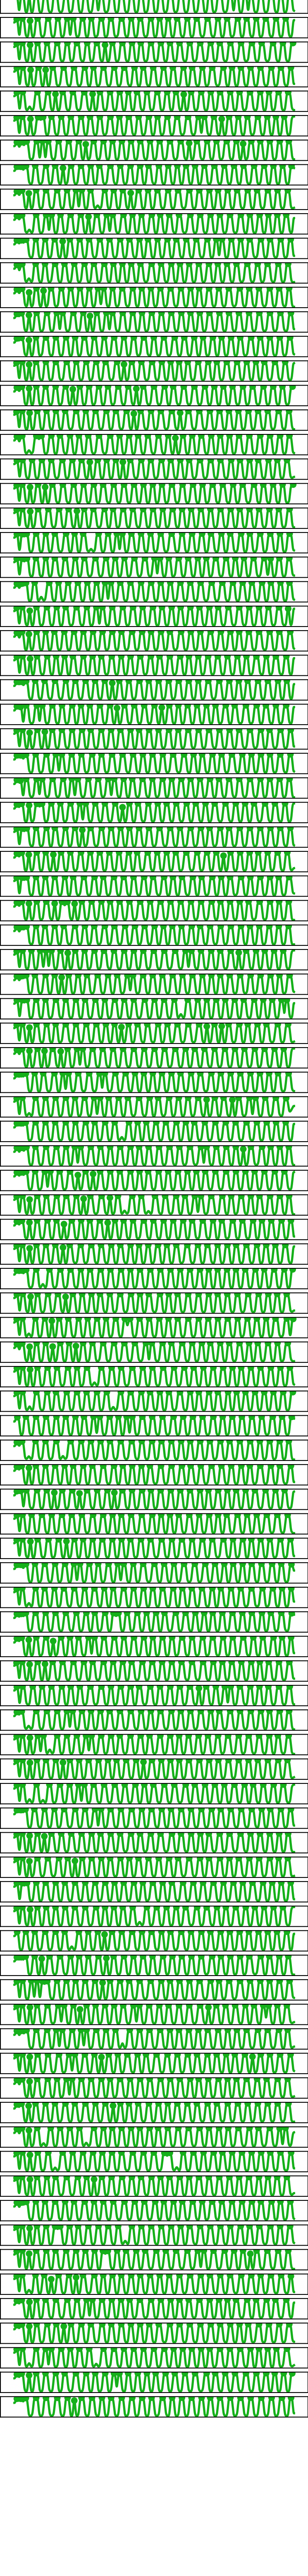

Supplement: supp [file elife-33843-supp-v1.zip]

# Histogram of peak counts

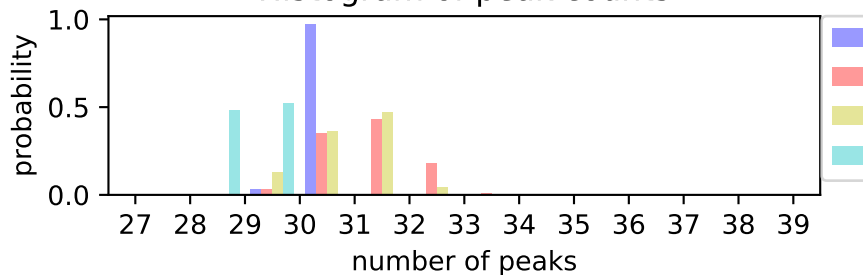

# Histogram of defects per embryo

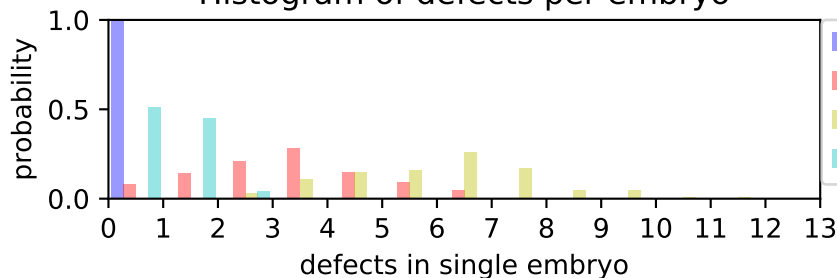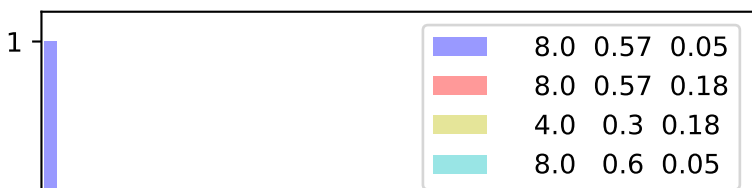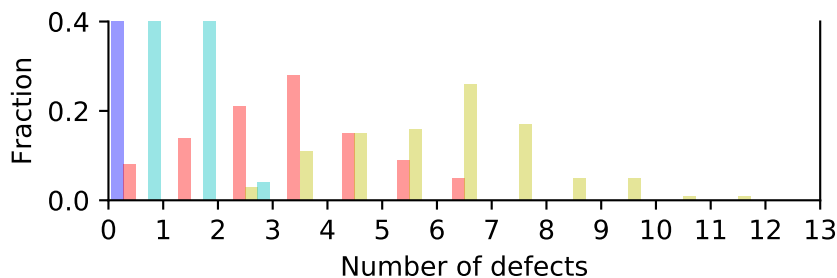

Supplement: supp [file elife-33843-supp-v1.zip]

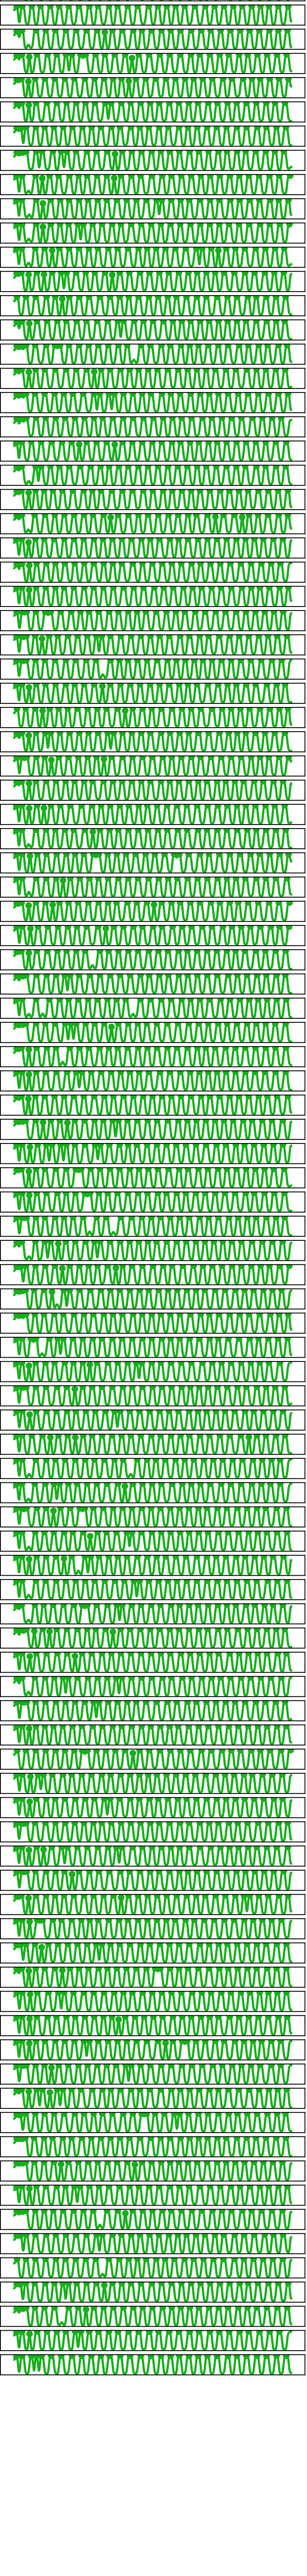

Supplement: supp [file elife-33843-supp-v1.zip]

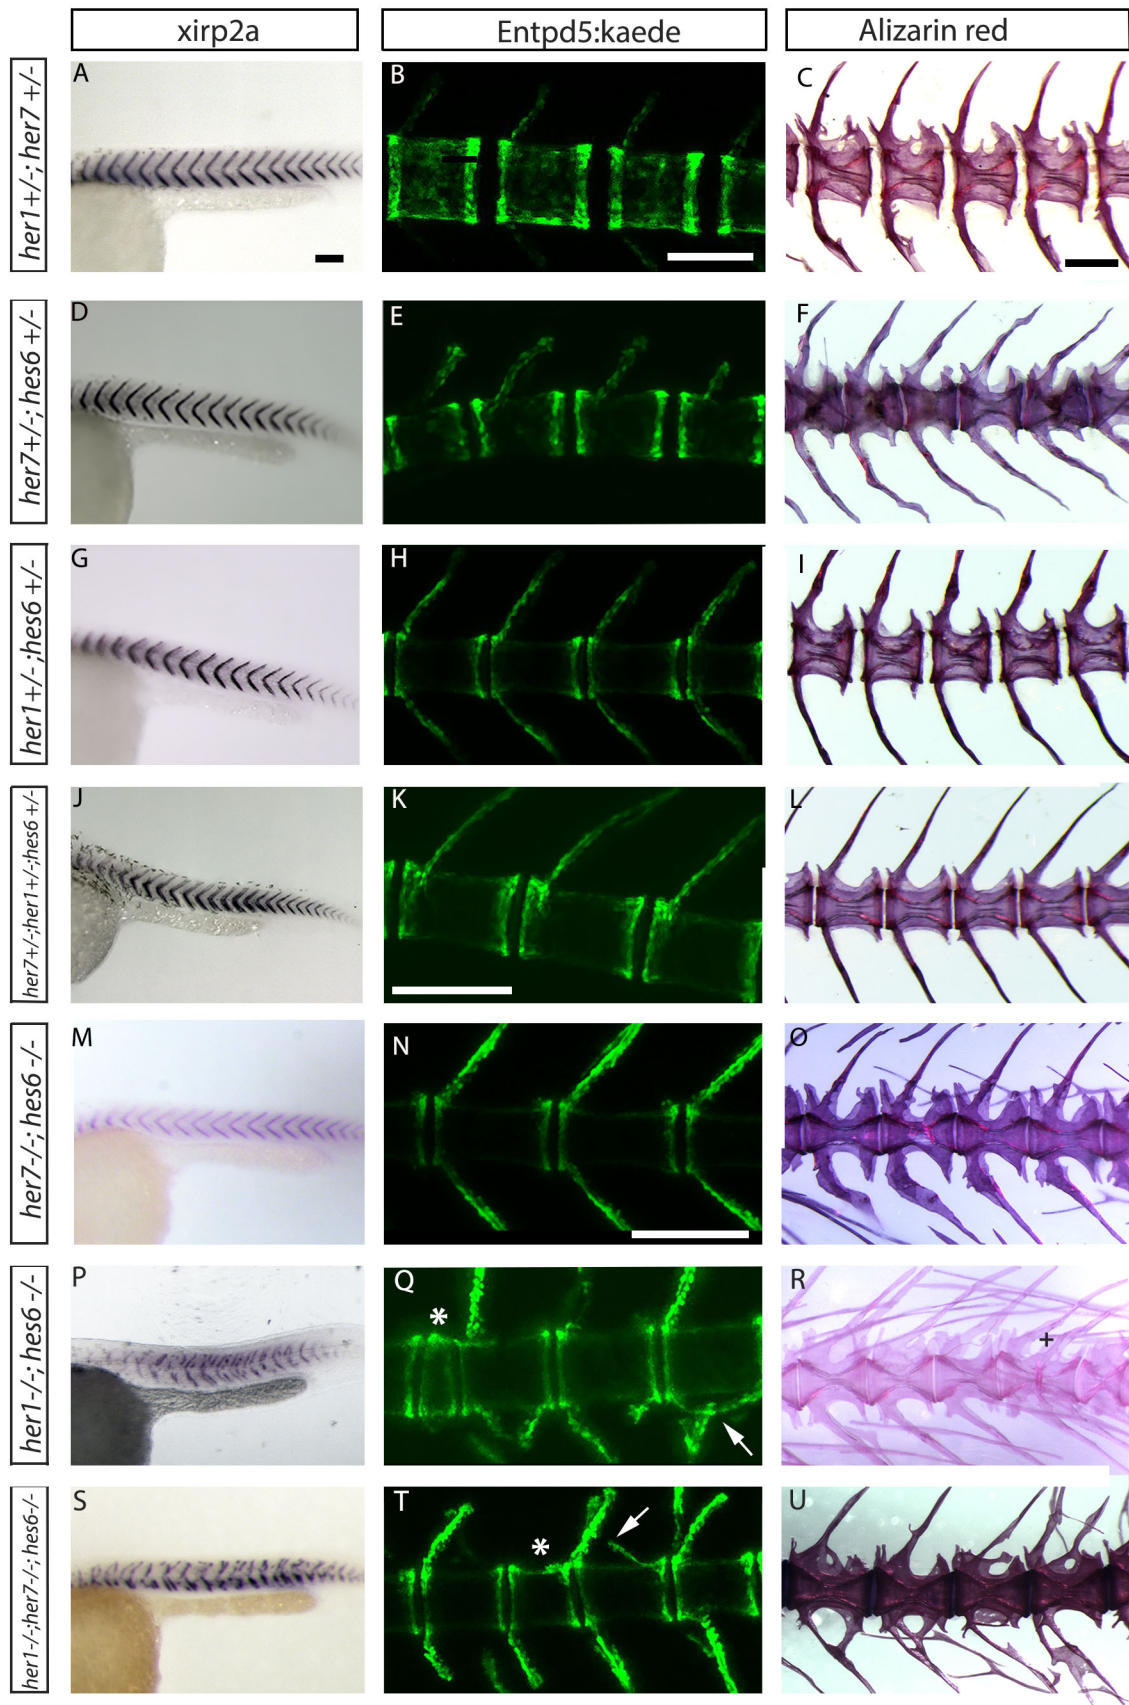

**Figure 2- figure supplement 4**

Supplement: supp [file elife-33843-supp-v1.zip]

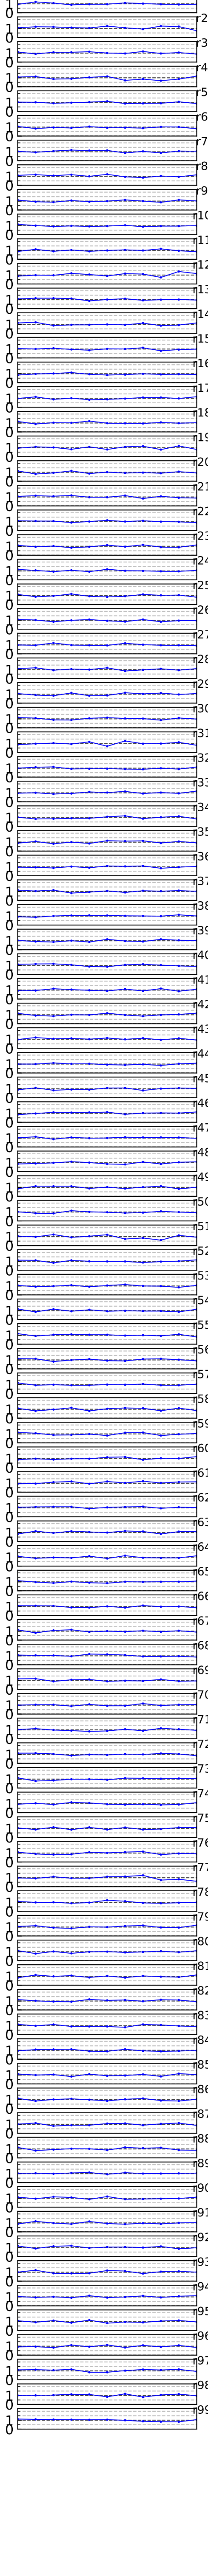

Supplement: supp [file elife-33843-supp-v1.zip]

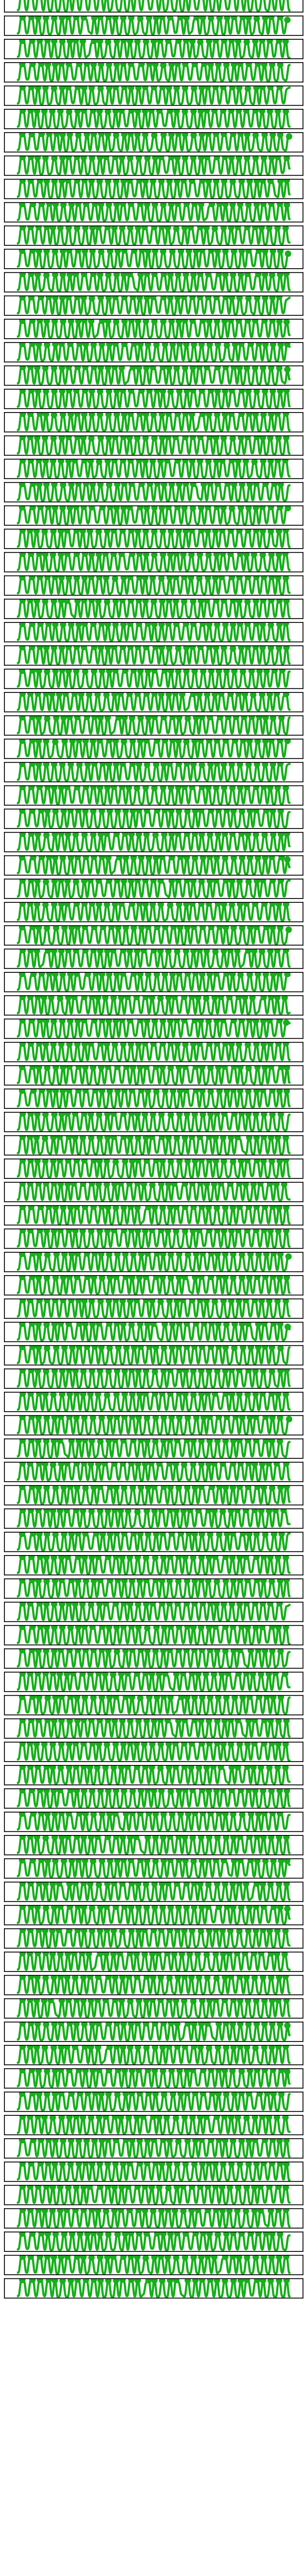

Supplement: supp [file elife-33843-supp-v1.zip]

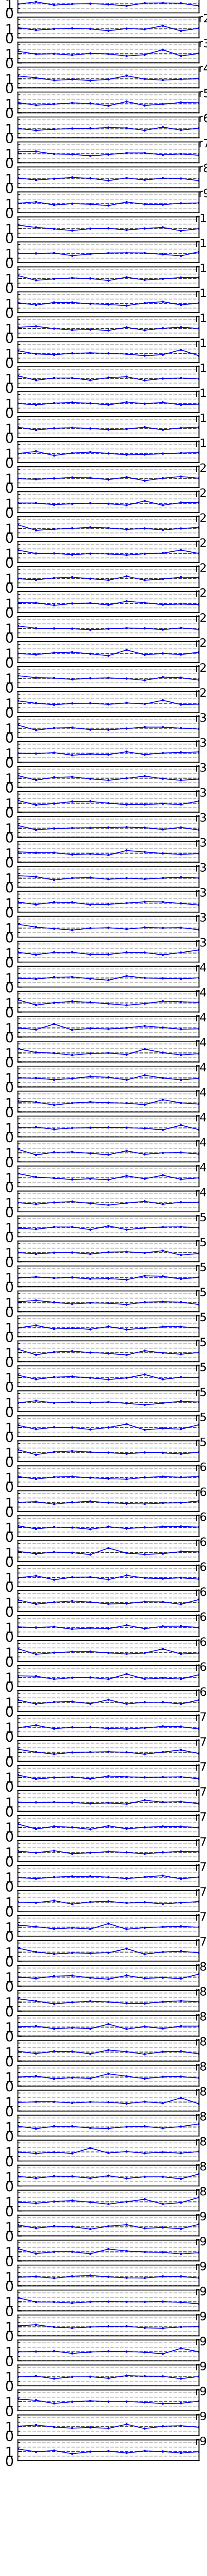

Supplement: supp [file elife-33843-supp-v1.zip]

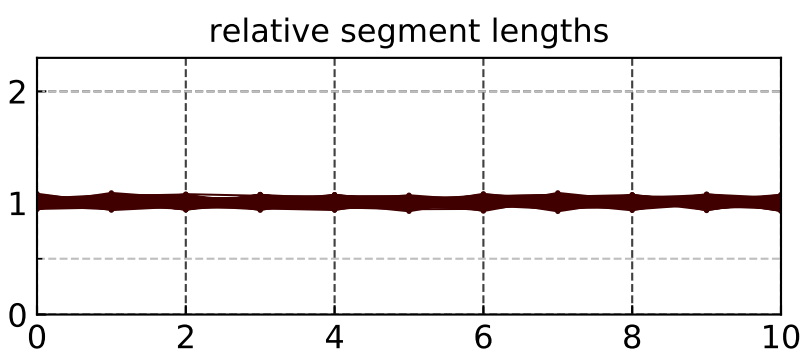

Supplement: supp [file elife-33843-supp-v1.zip]

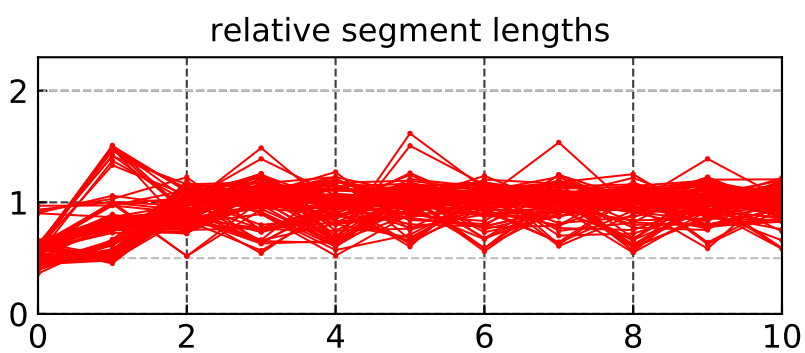

Supplement: supp [file elife-33843-supp-v1.zip]

activator, inhibitor, sink profile concentration

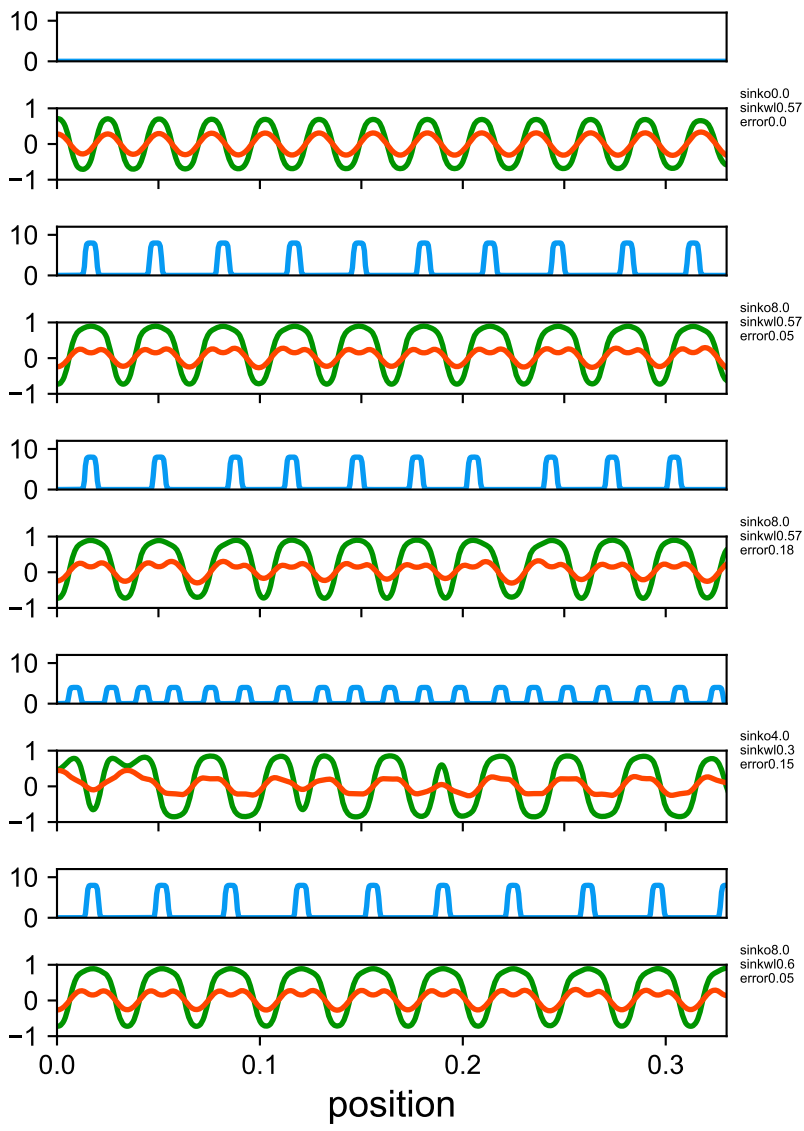

Supplement: supp [file elife-33843-supp-v1.zip]

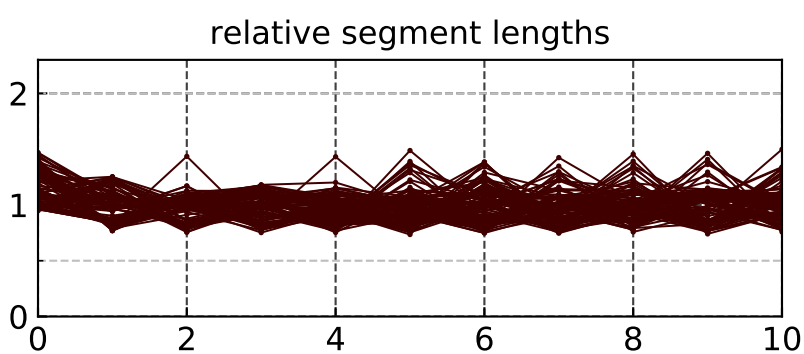

Supplement: supp [file elife-33843-supp-v1.zip]

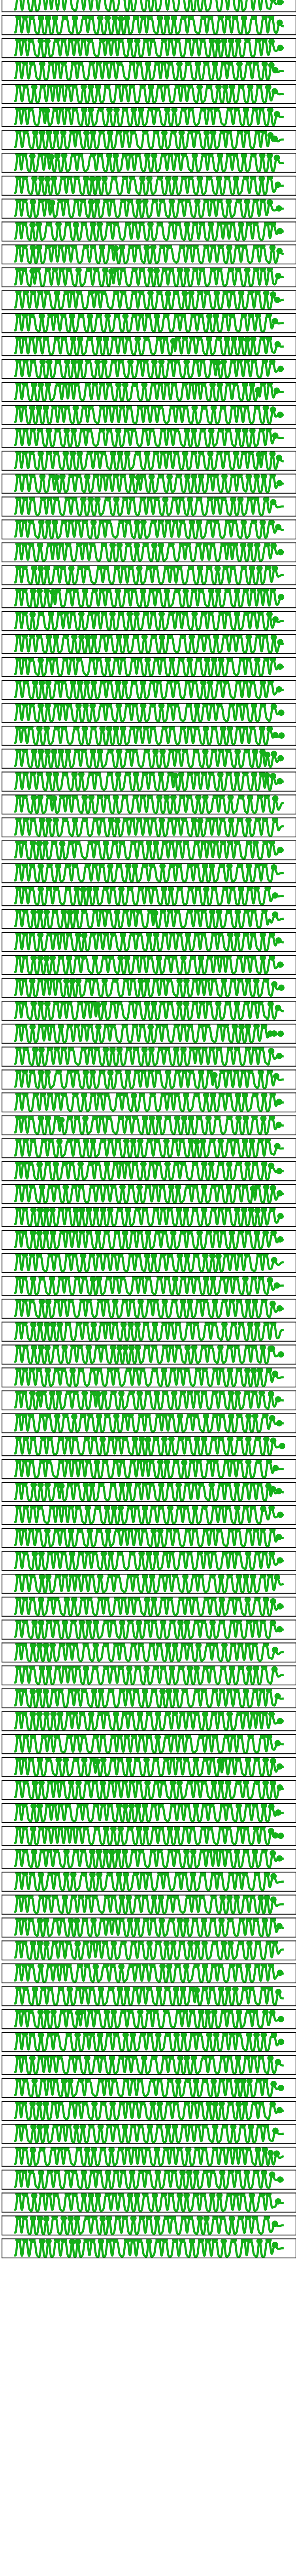

Supplement: supp [file elife-33843-supp-v1.zip]

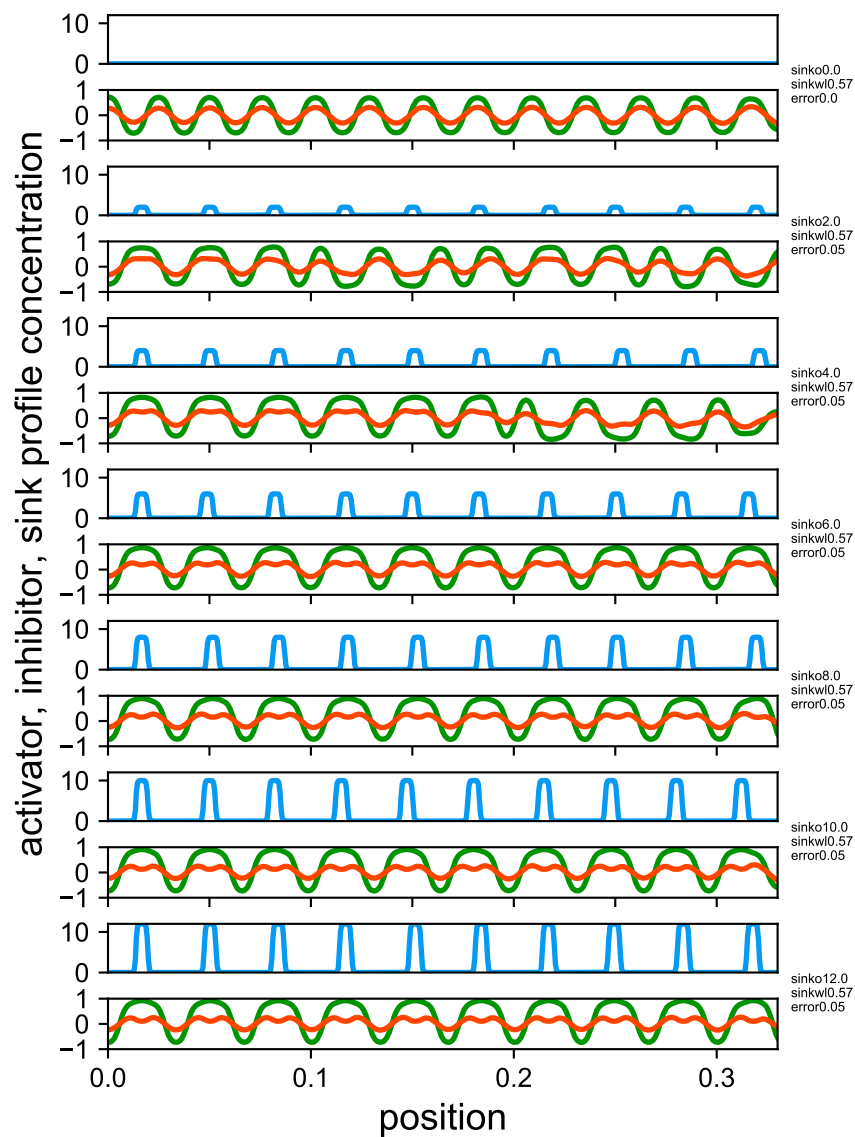

Supplement: supp [file elife-33843-supp-v1.zip]

activator, inhibitor, sink profile concentration

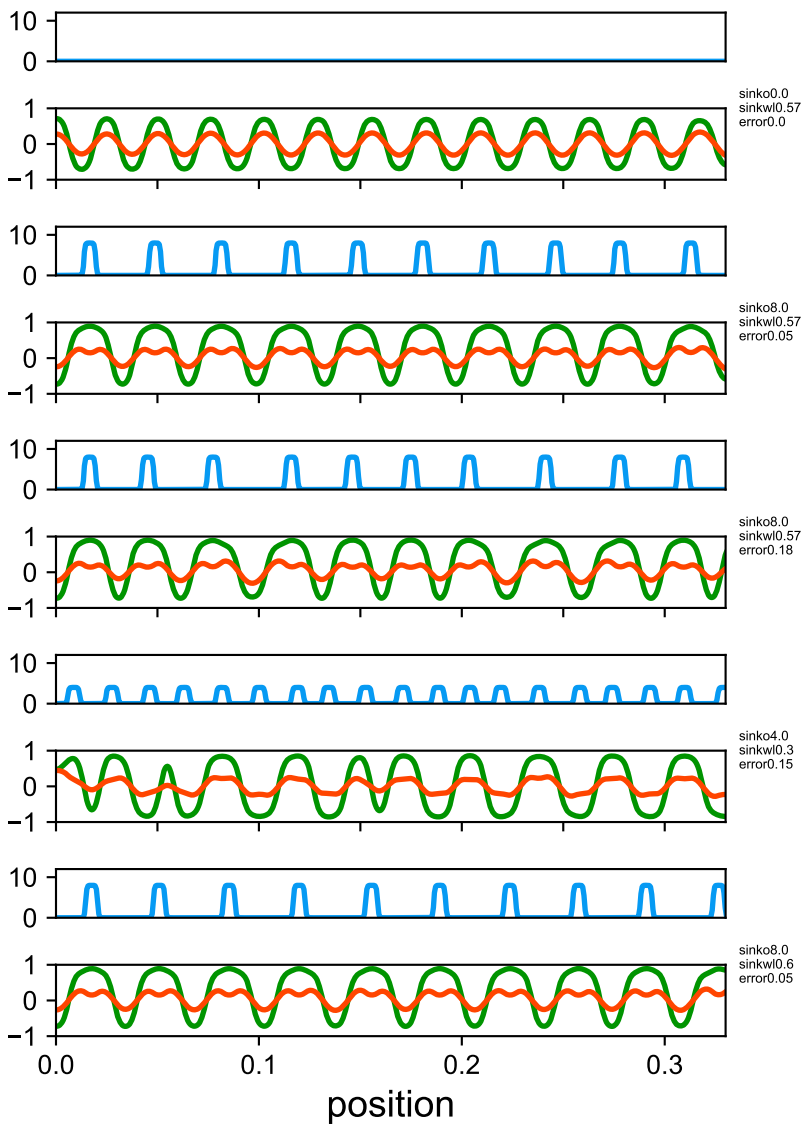

Supplement: supp [file elife-33843-supp-v1.zip]

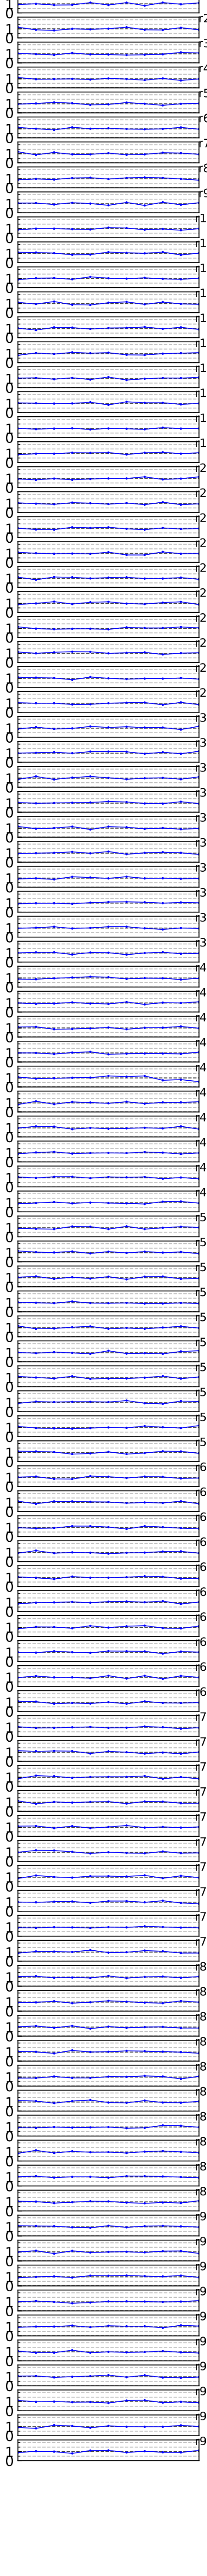

Supplement: supp [file elife-33843-supp-v1.zip]

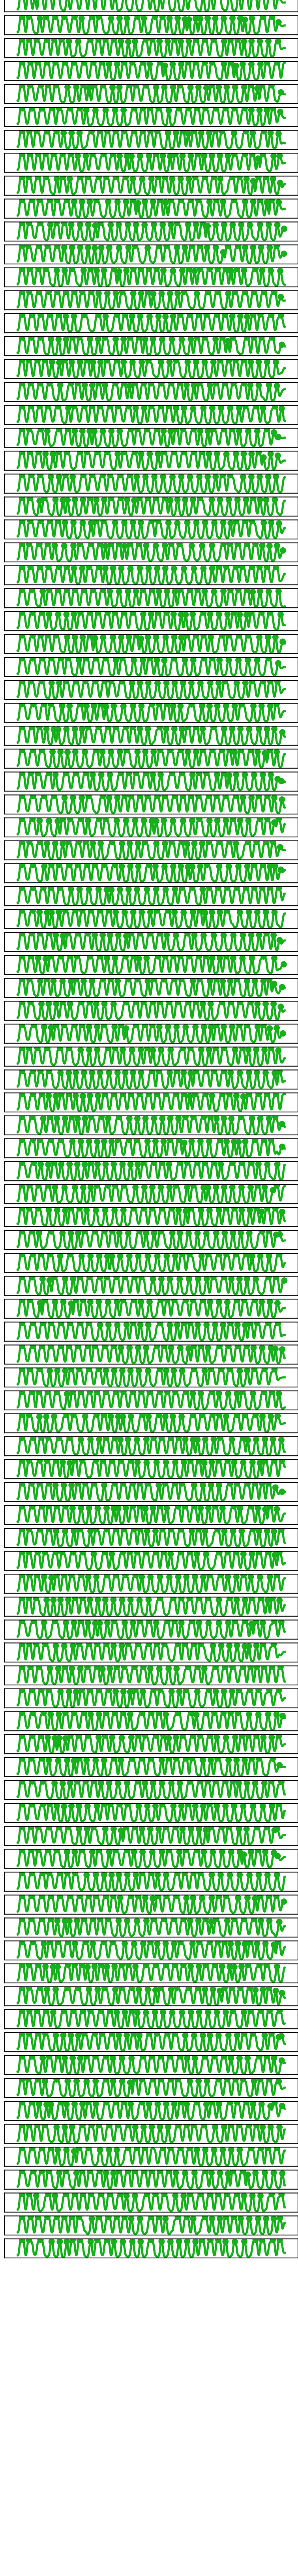

Supplement: supp [file elife-33843-supp-v1.zip]

activator, inhibitor, sink profile concentration

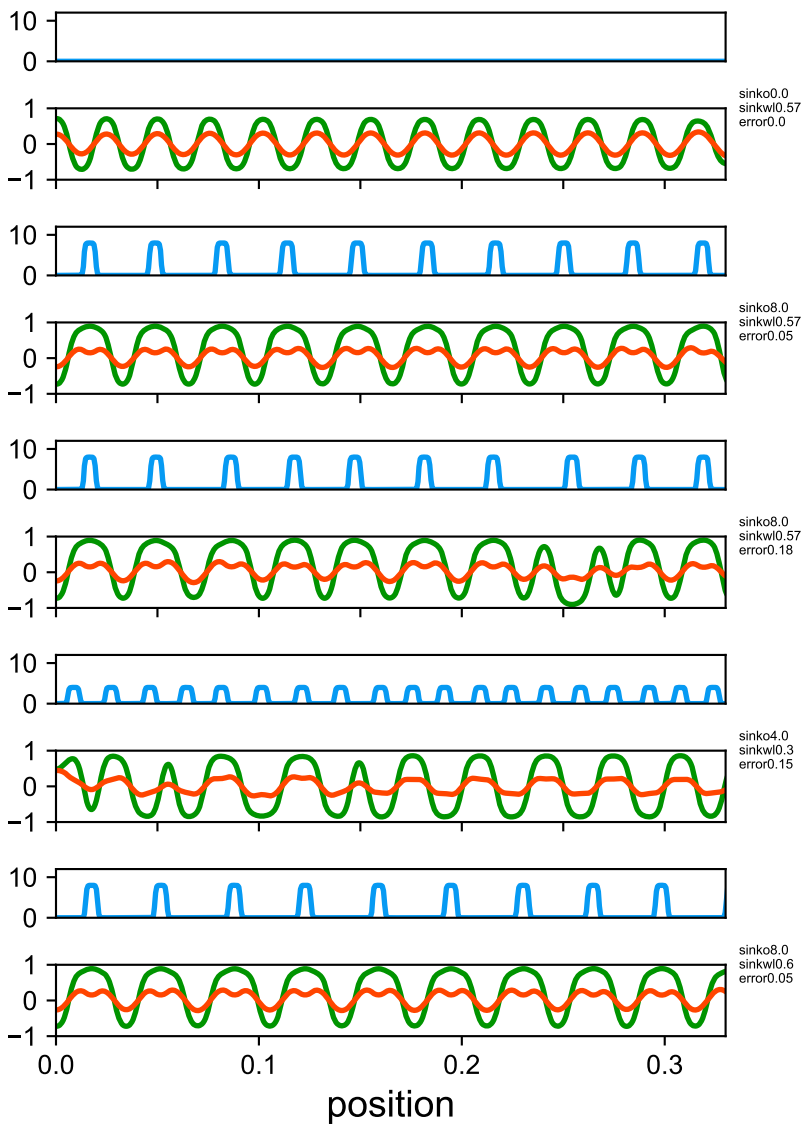

Supplement: supp [file elife-33843-supp-v1.zip]

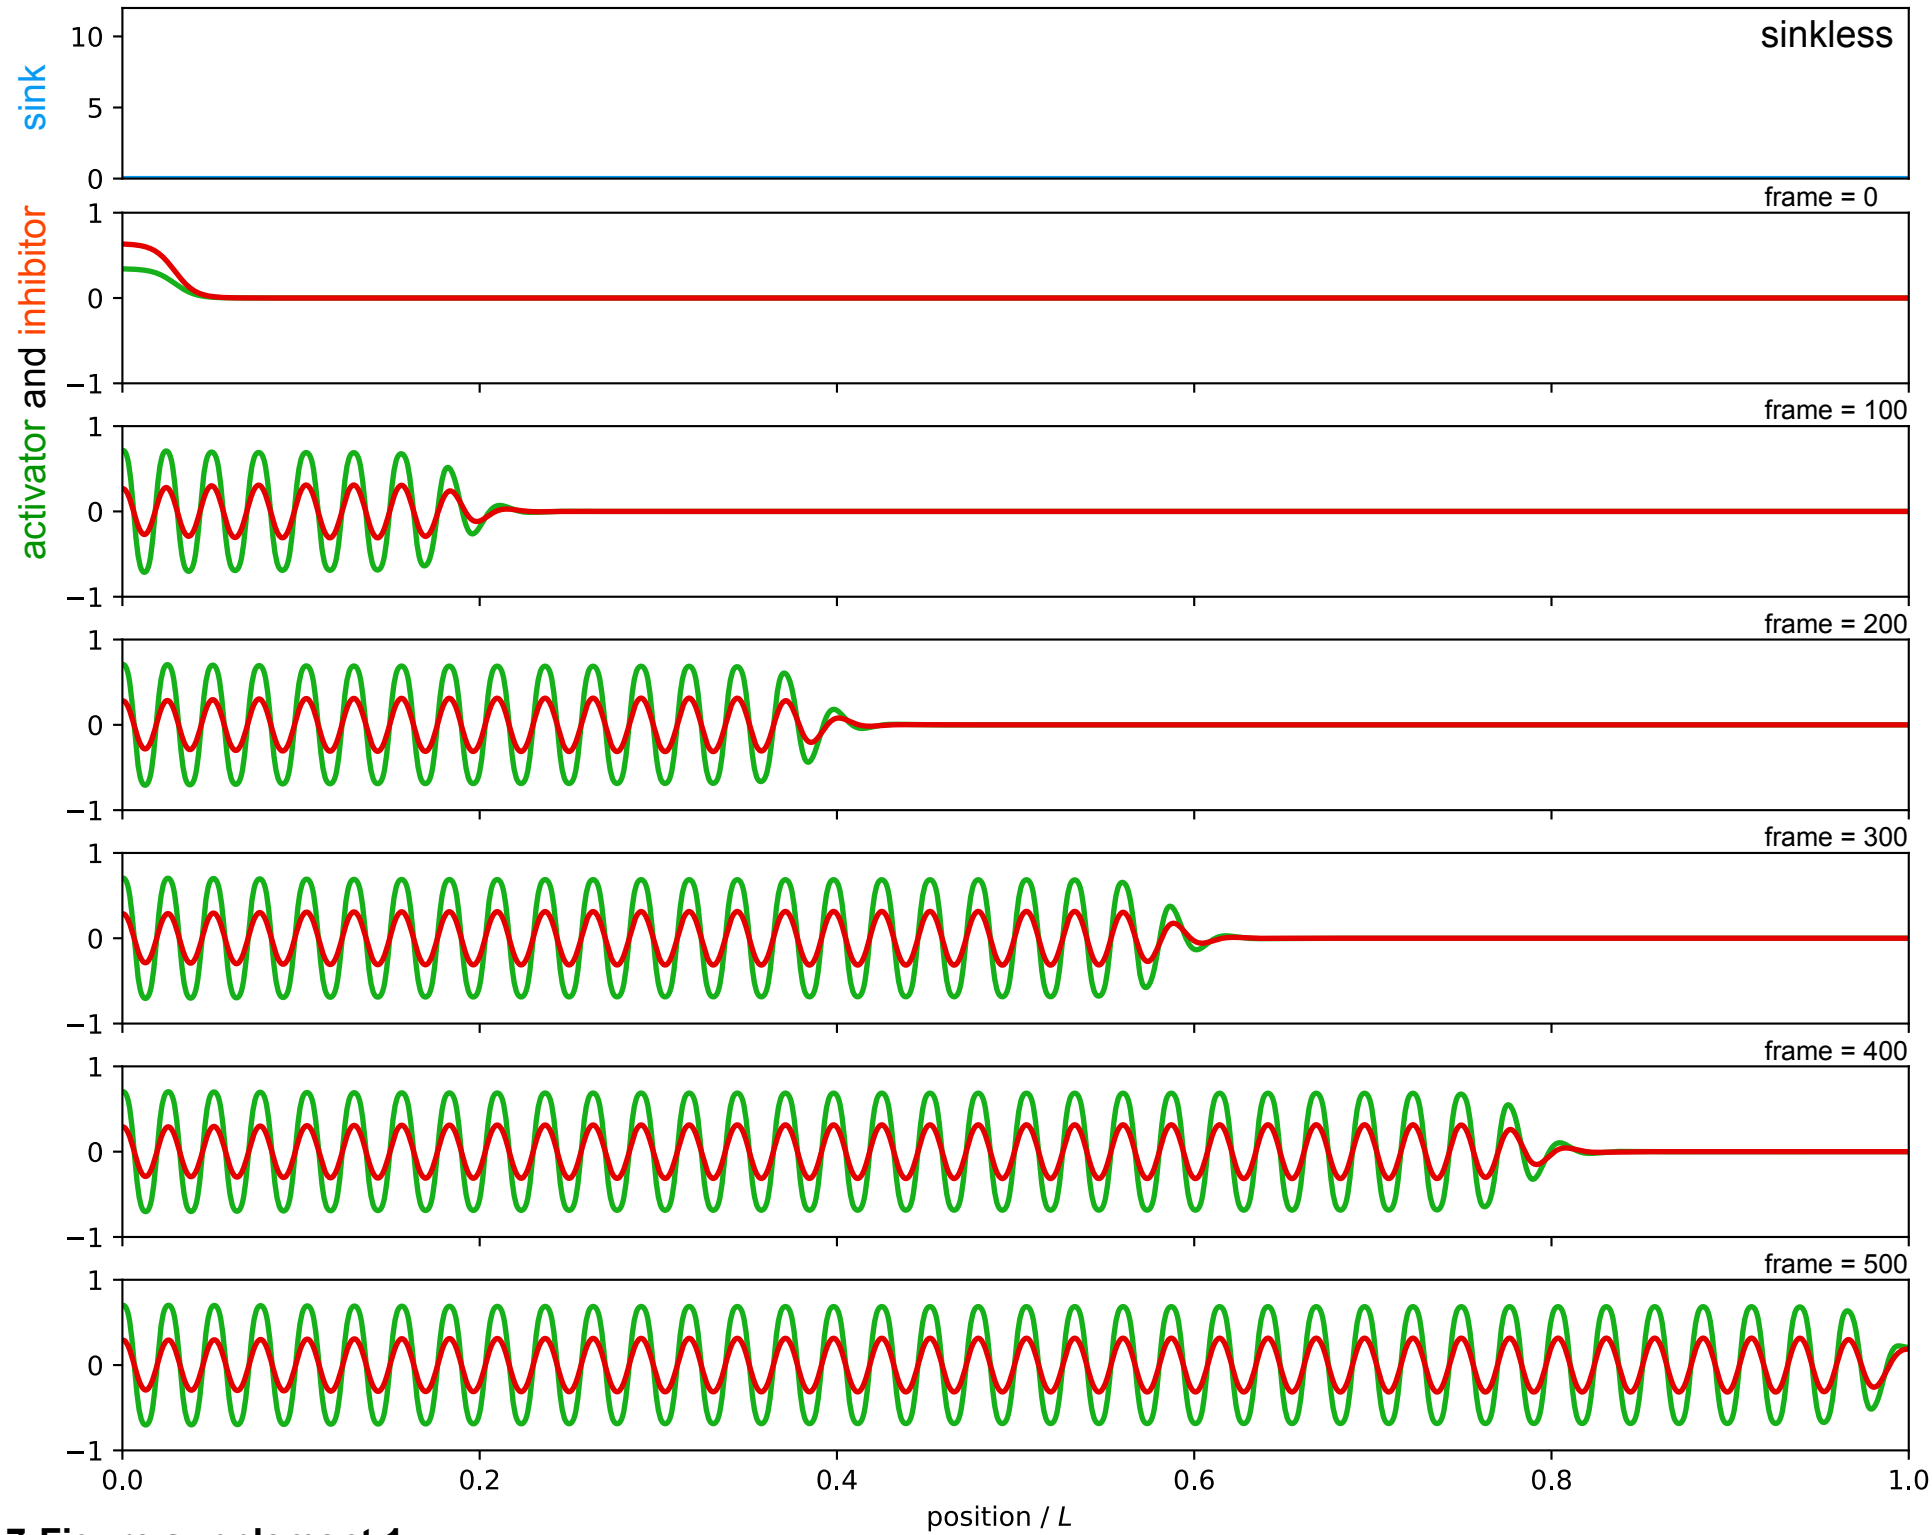

Figure 7-Figure supplement 1

Supplement: supp [file elife-33843-supp-v1.zip]

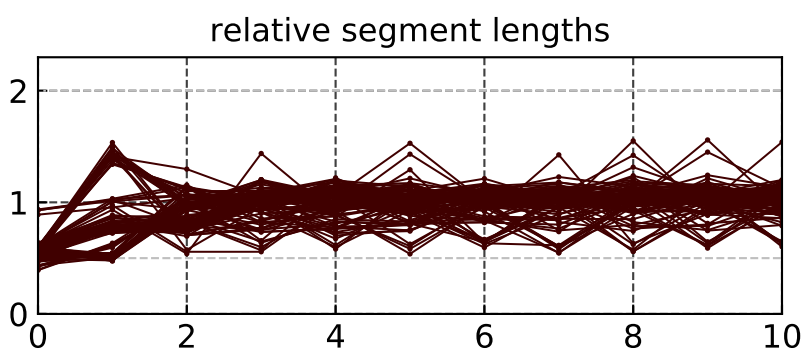

Supplement: supp [file elife-33843-supp-v1.zip]

# Histogram of peak counts

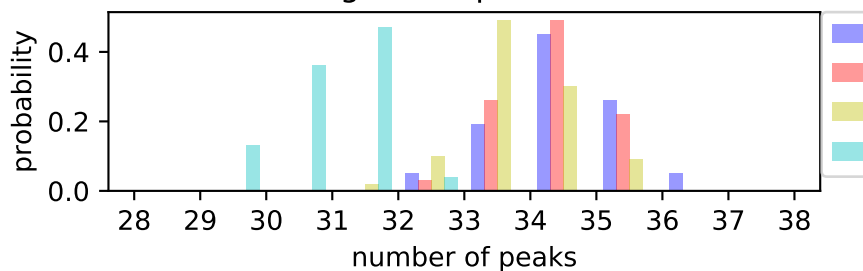

# Histogram of defects per embryo

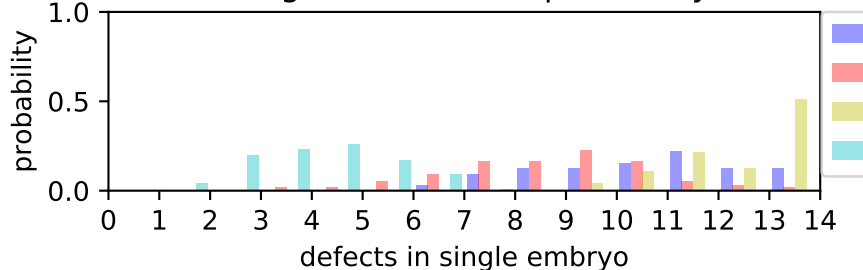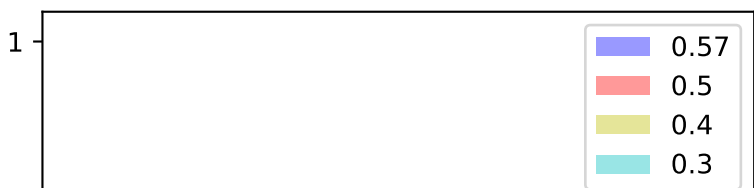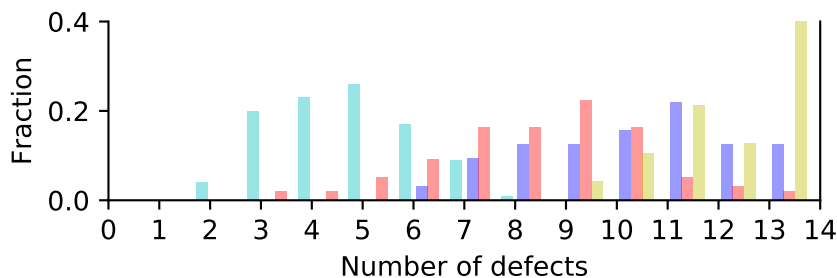

Supplement: supp [file elife-33843-supp-v1.zip]

activator, inhibitor, sink profile concentration

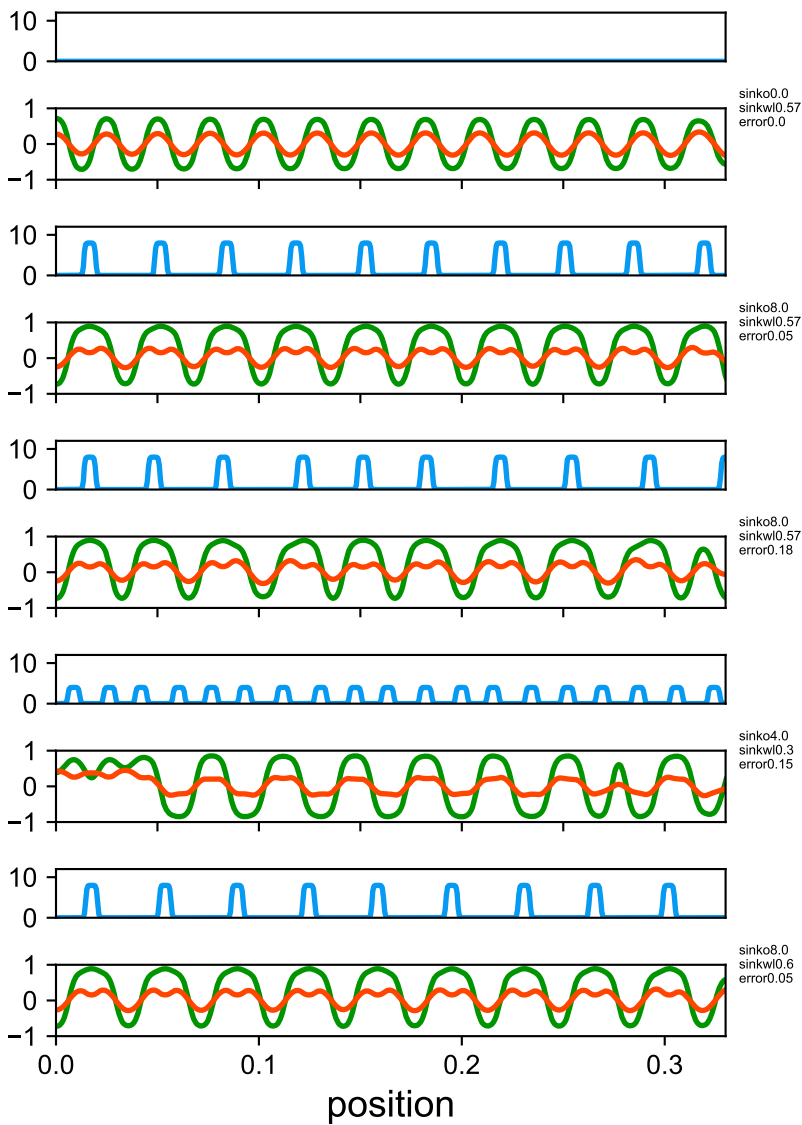

Supplement: supp [file elife-33843-supp-v1.zip]

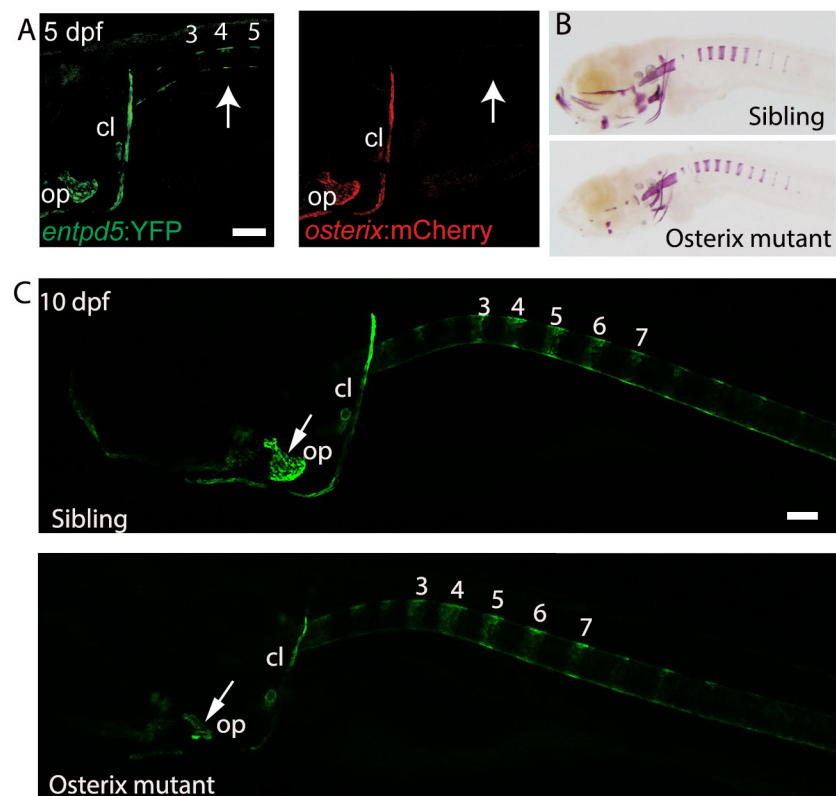

**Figure 3- figure supplement 1**

Supplement: supp [file elife-33843-supp-v1.zip]

relative segment lengths

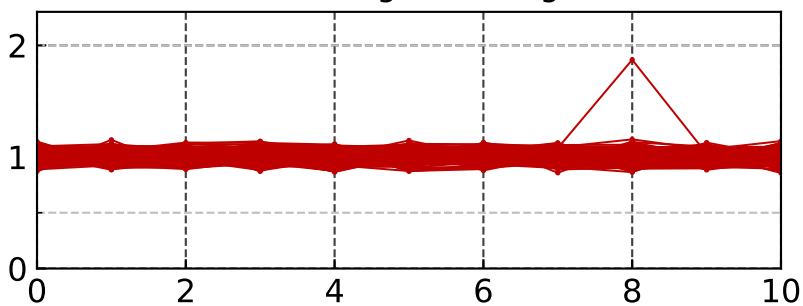

Supplement: supp [file elife-33843-supp-v1.zip]

# Histogram of peak counts



# Histogram of defects per embryo

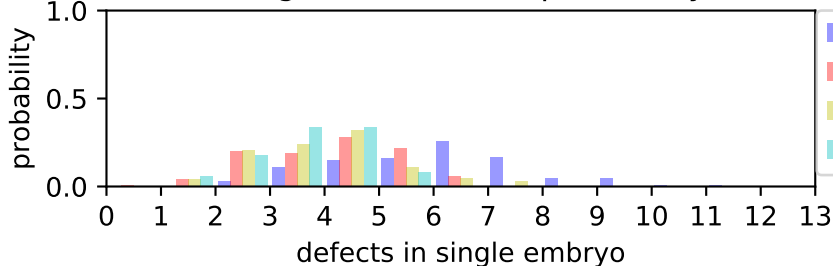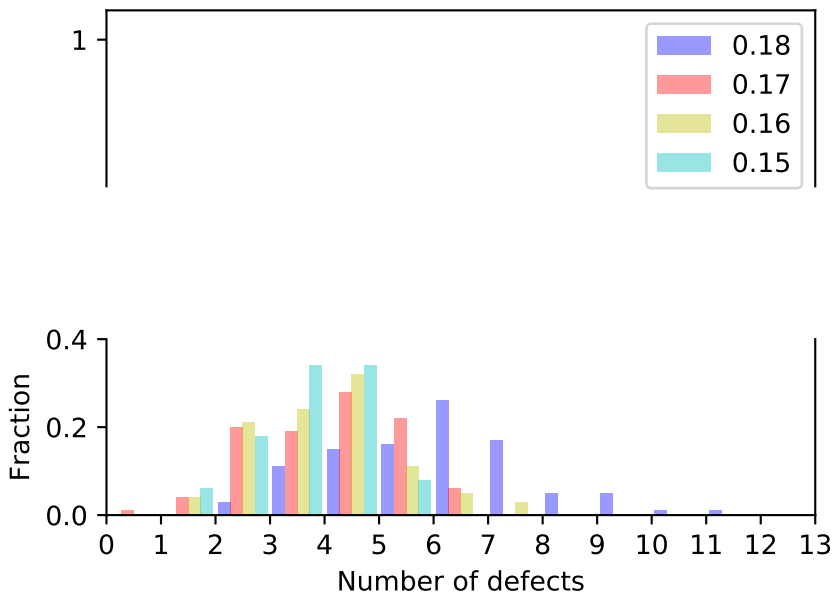

Supplement: supp [file elife-33843-supp-v1.zip]

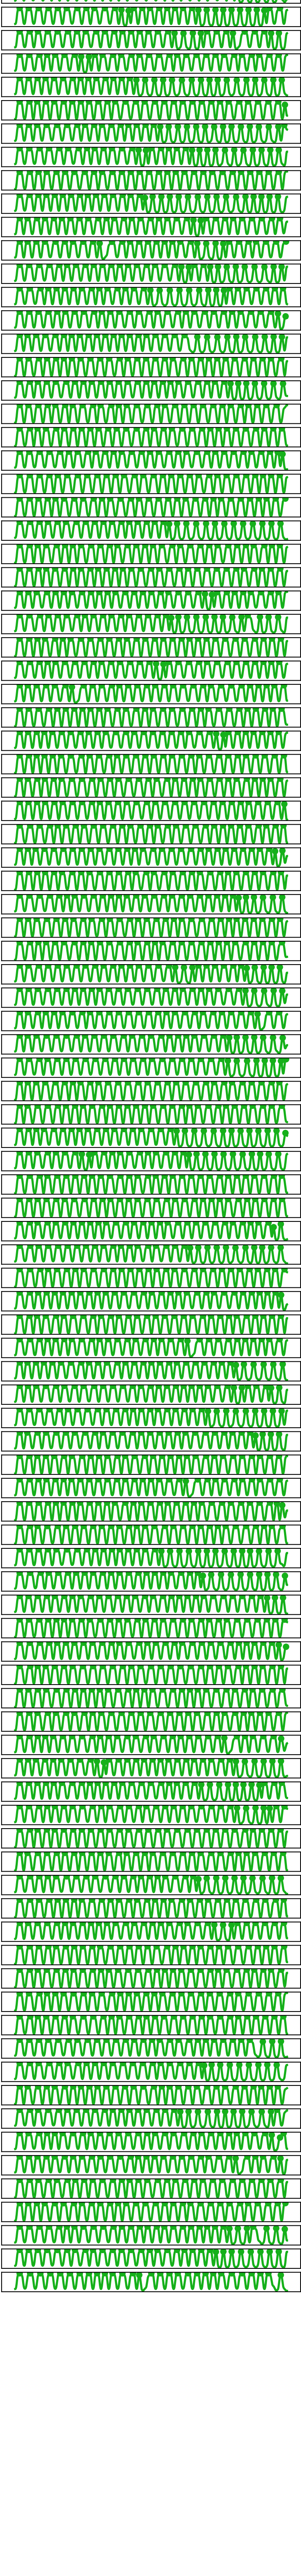

Supplement: supp [file elife-33843-supp-v1.zip]

# Histogram of peak counts

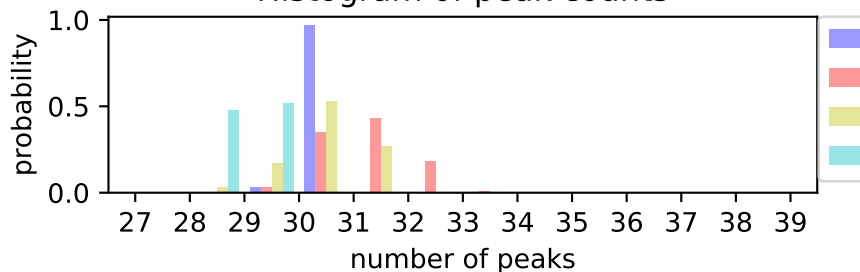

# Histogram of defects per embryo

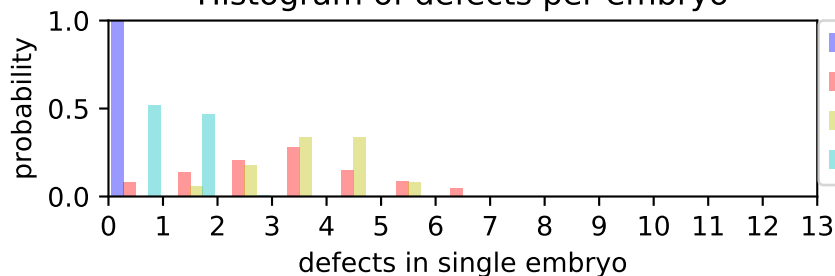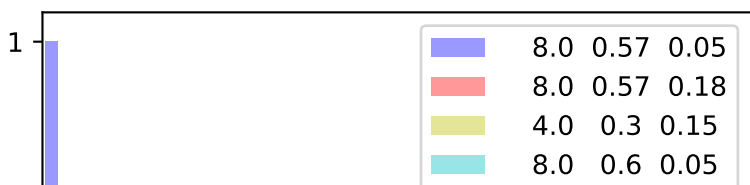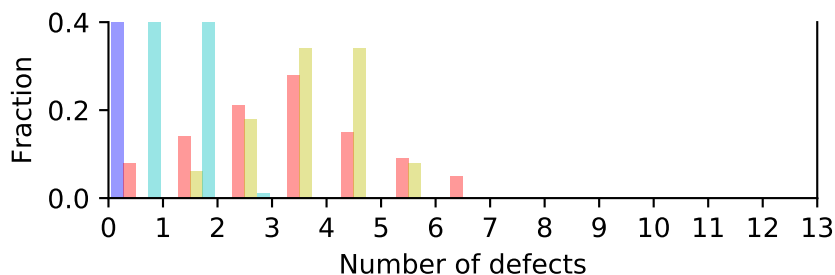

Supplement: supp [file elife-33843-supp-v1.zip]

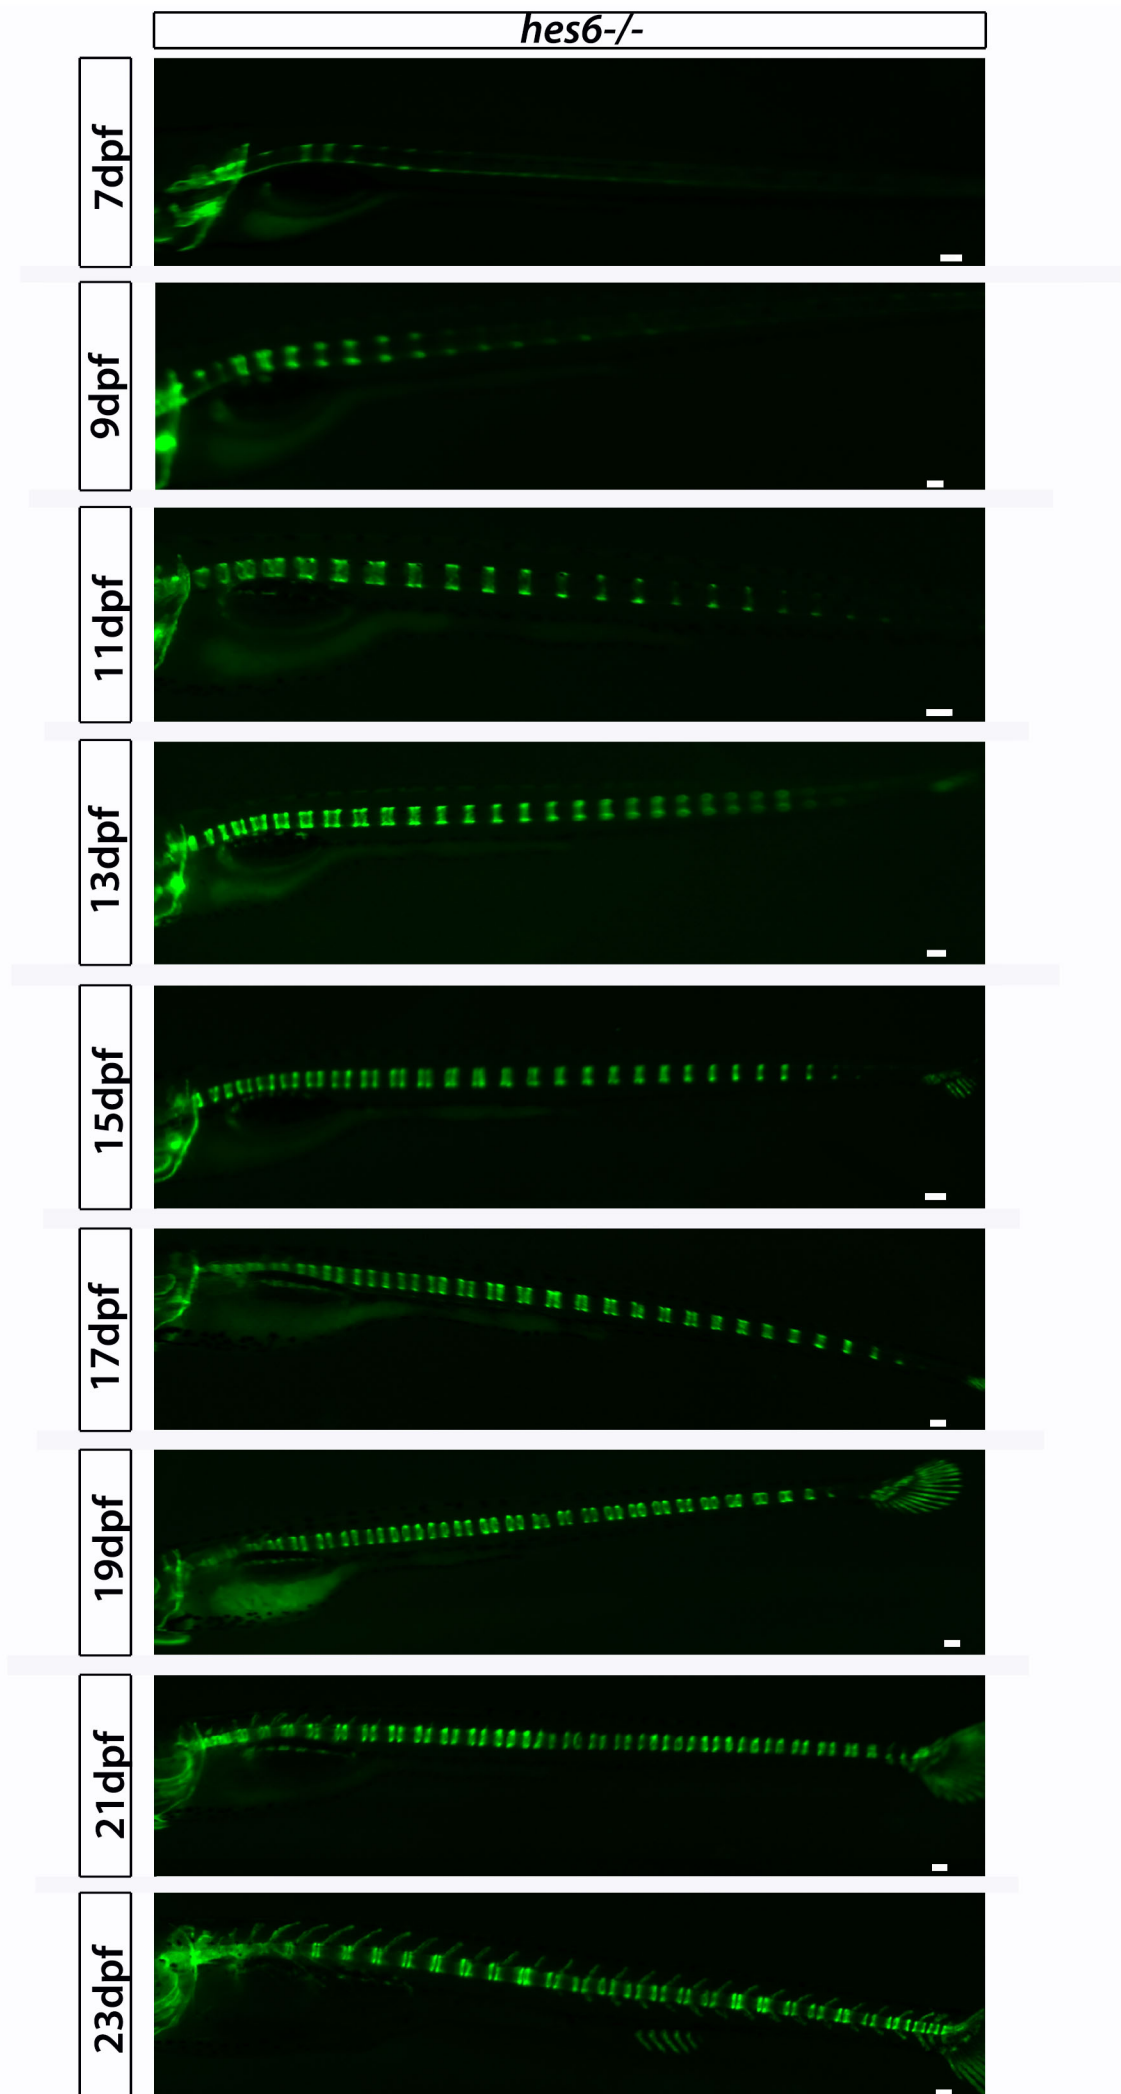

Figure 4- figure supplement 5

Supplement: supp [file elife-33843-supp-v1.zip]

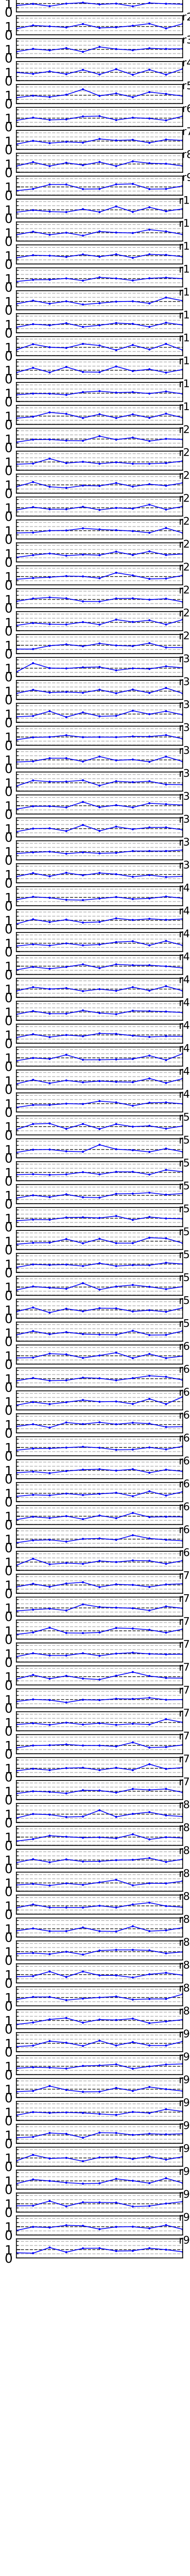

Supplement: supp [file elife-33843-supp-v1.zip]

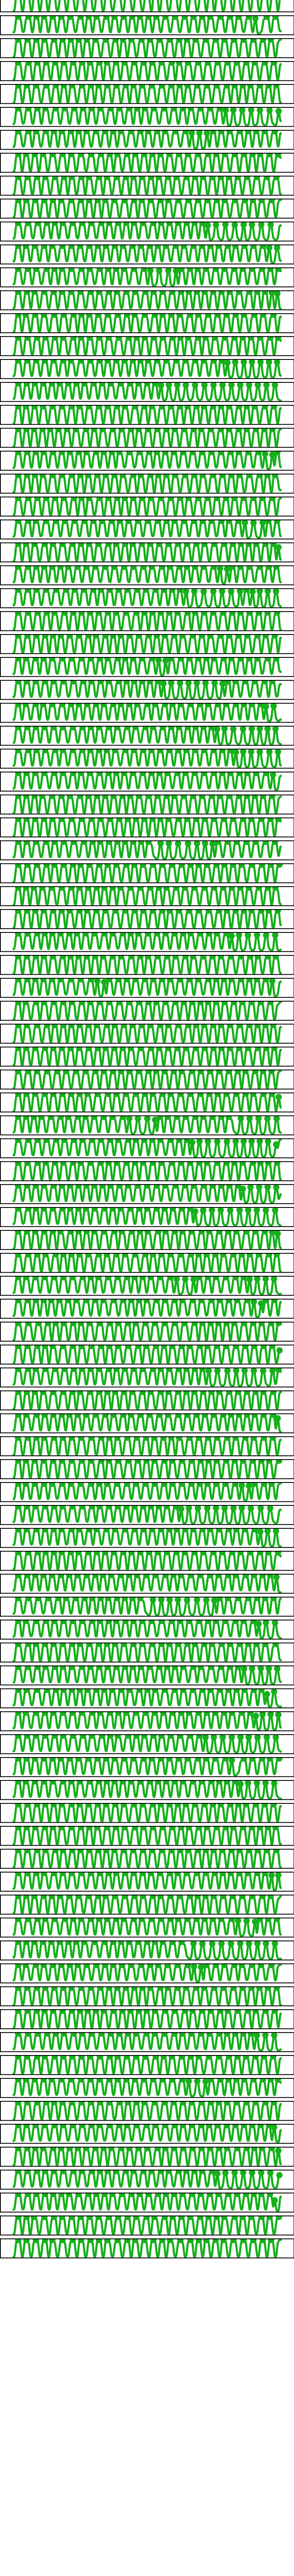

Supplement: supp [file elife-33843-supp-v1.zip]

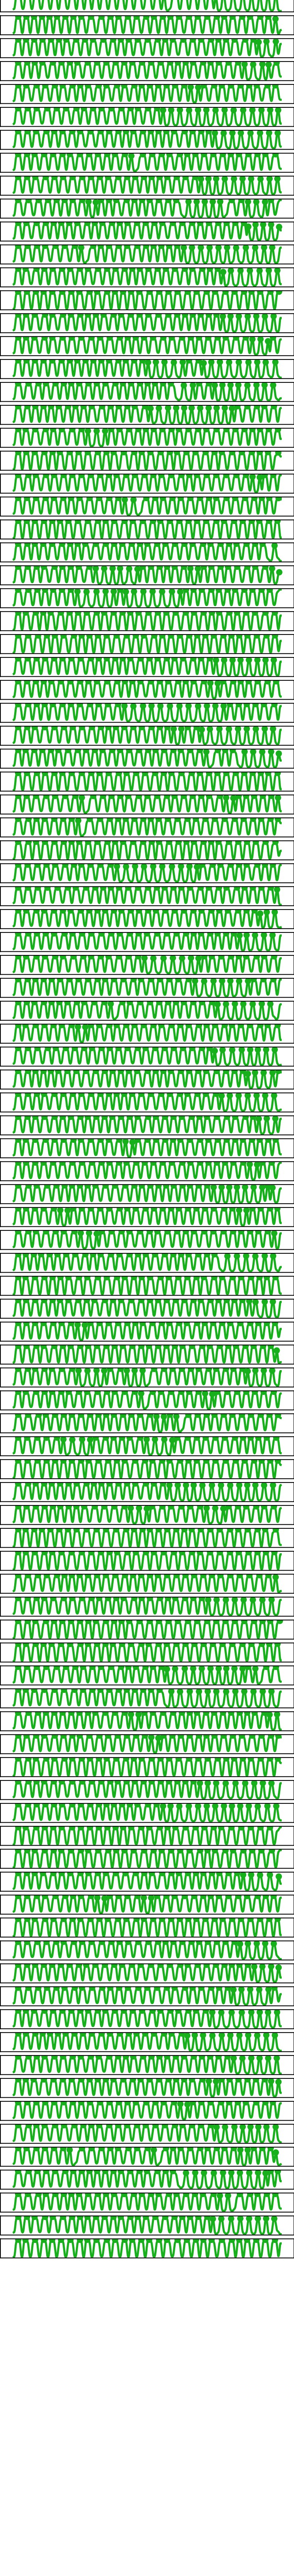

Supplement: supp [file elife-33843-supp-v1.zip]

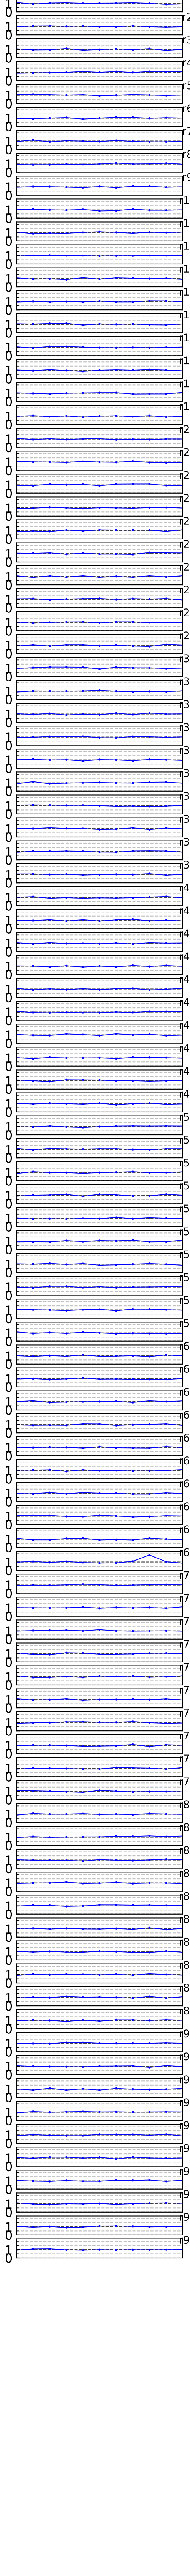

Supplement: supp [file elife-33843-supp-v1.zip]

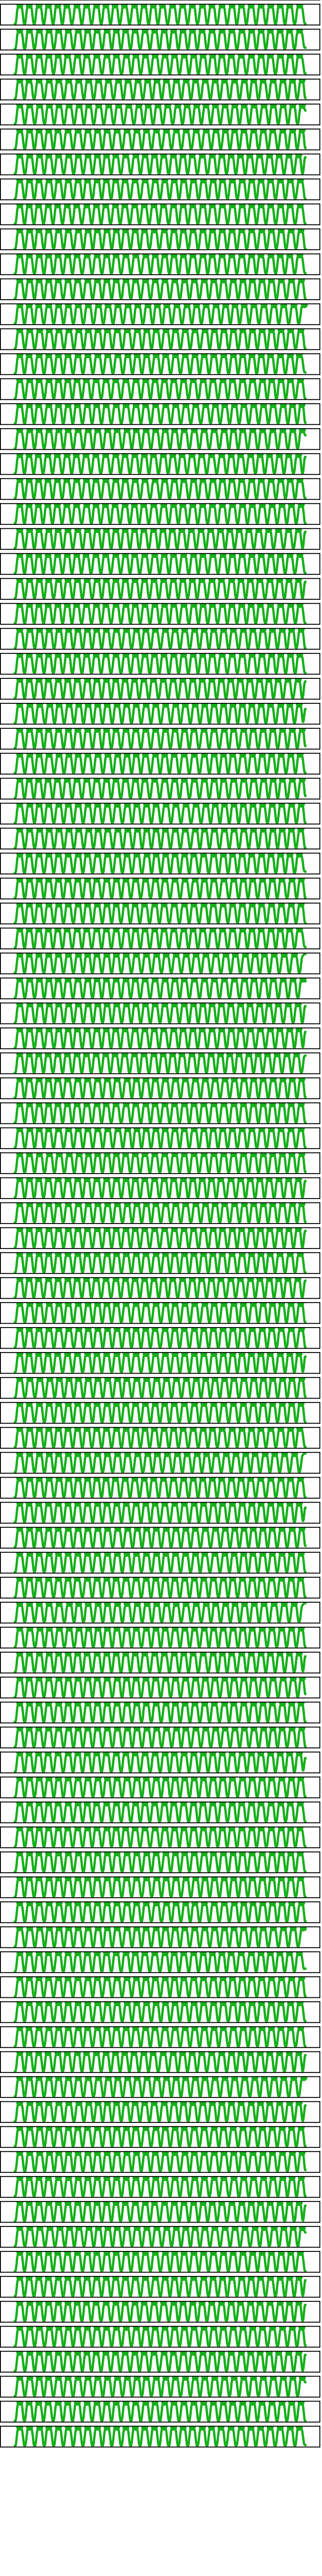

Supplement: supp [file elife-33843-supp-v1.zip]

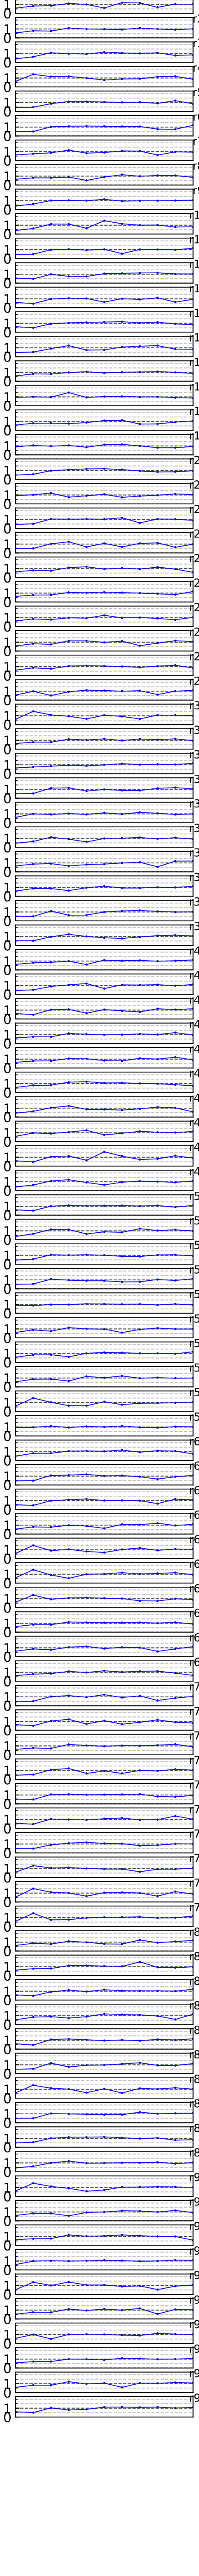

Supplement: supp [file elife-33843-supp-v1.zip]

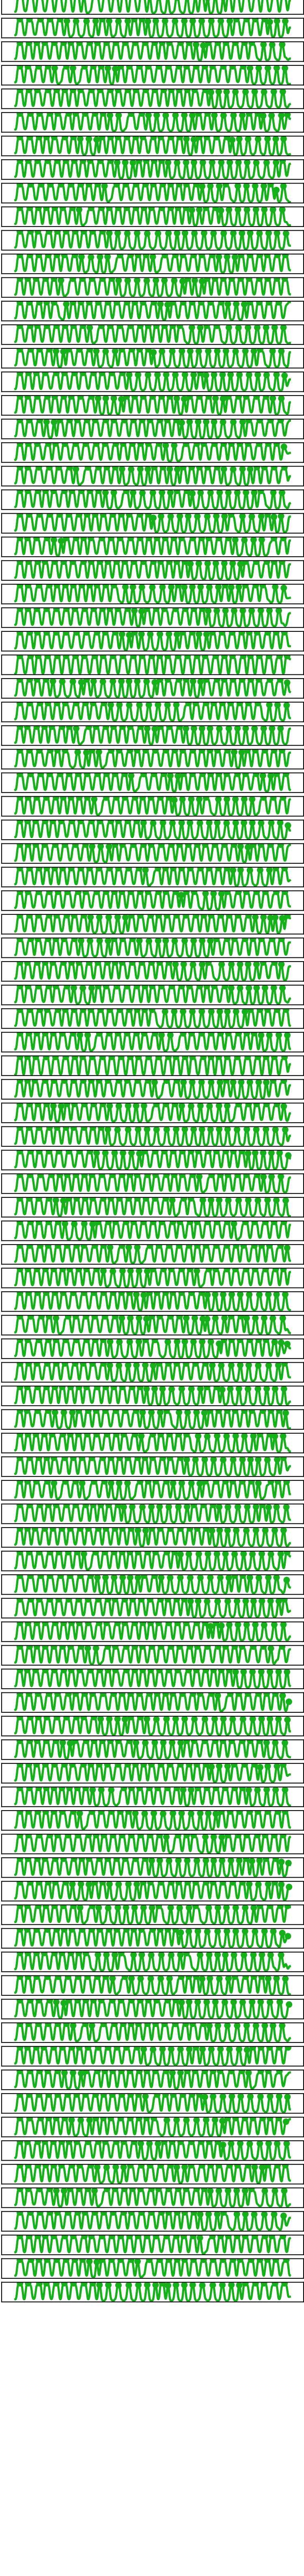

Supplement: supp [file elife-33843-supp-v1.zip]

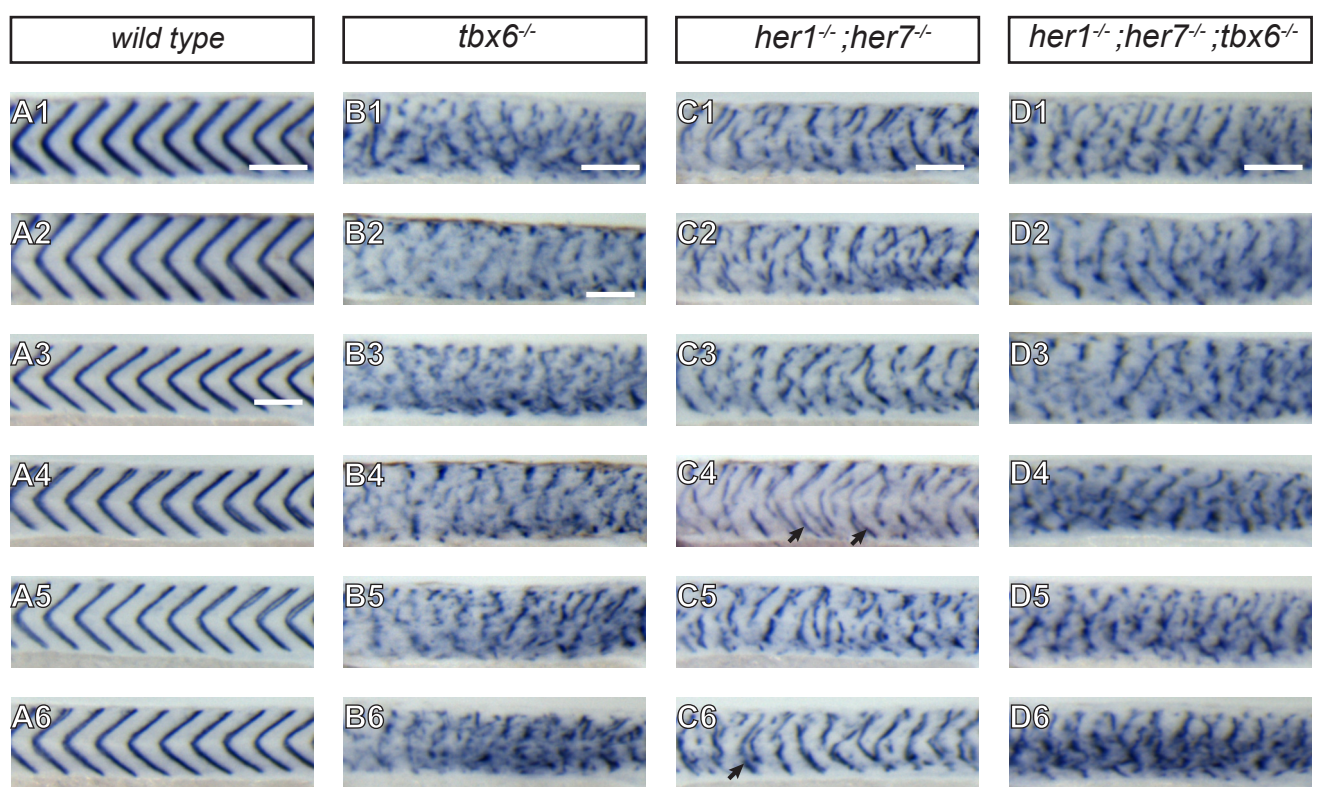

Figure 2 Supplement 1

Supplement: supp [file elife-33843-supp-v1.zip]

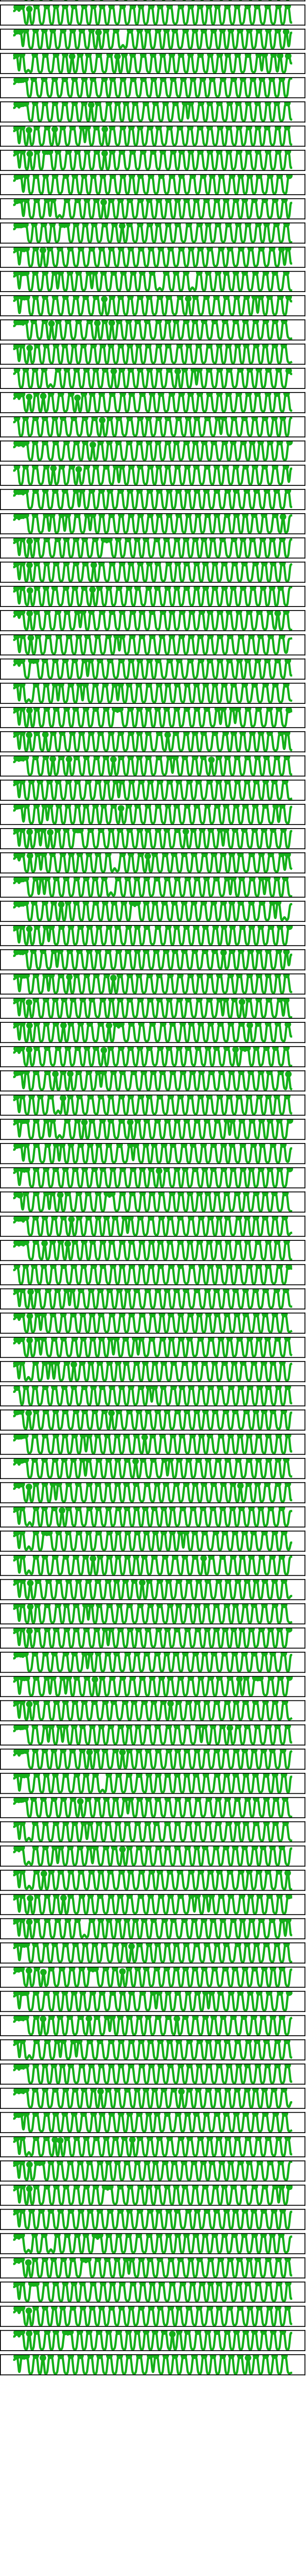

Supplement: supp [file elife-33843-supp-v1.zip]

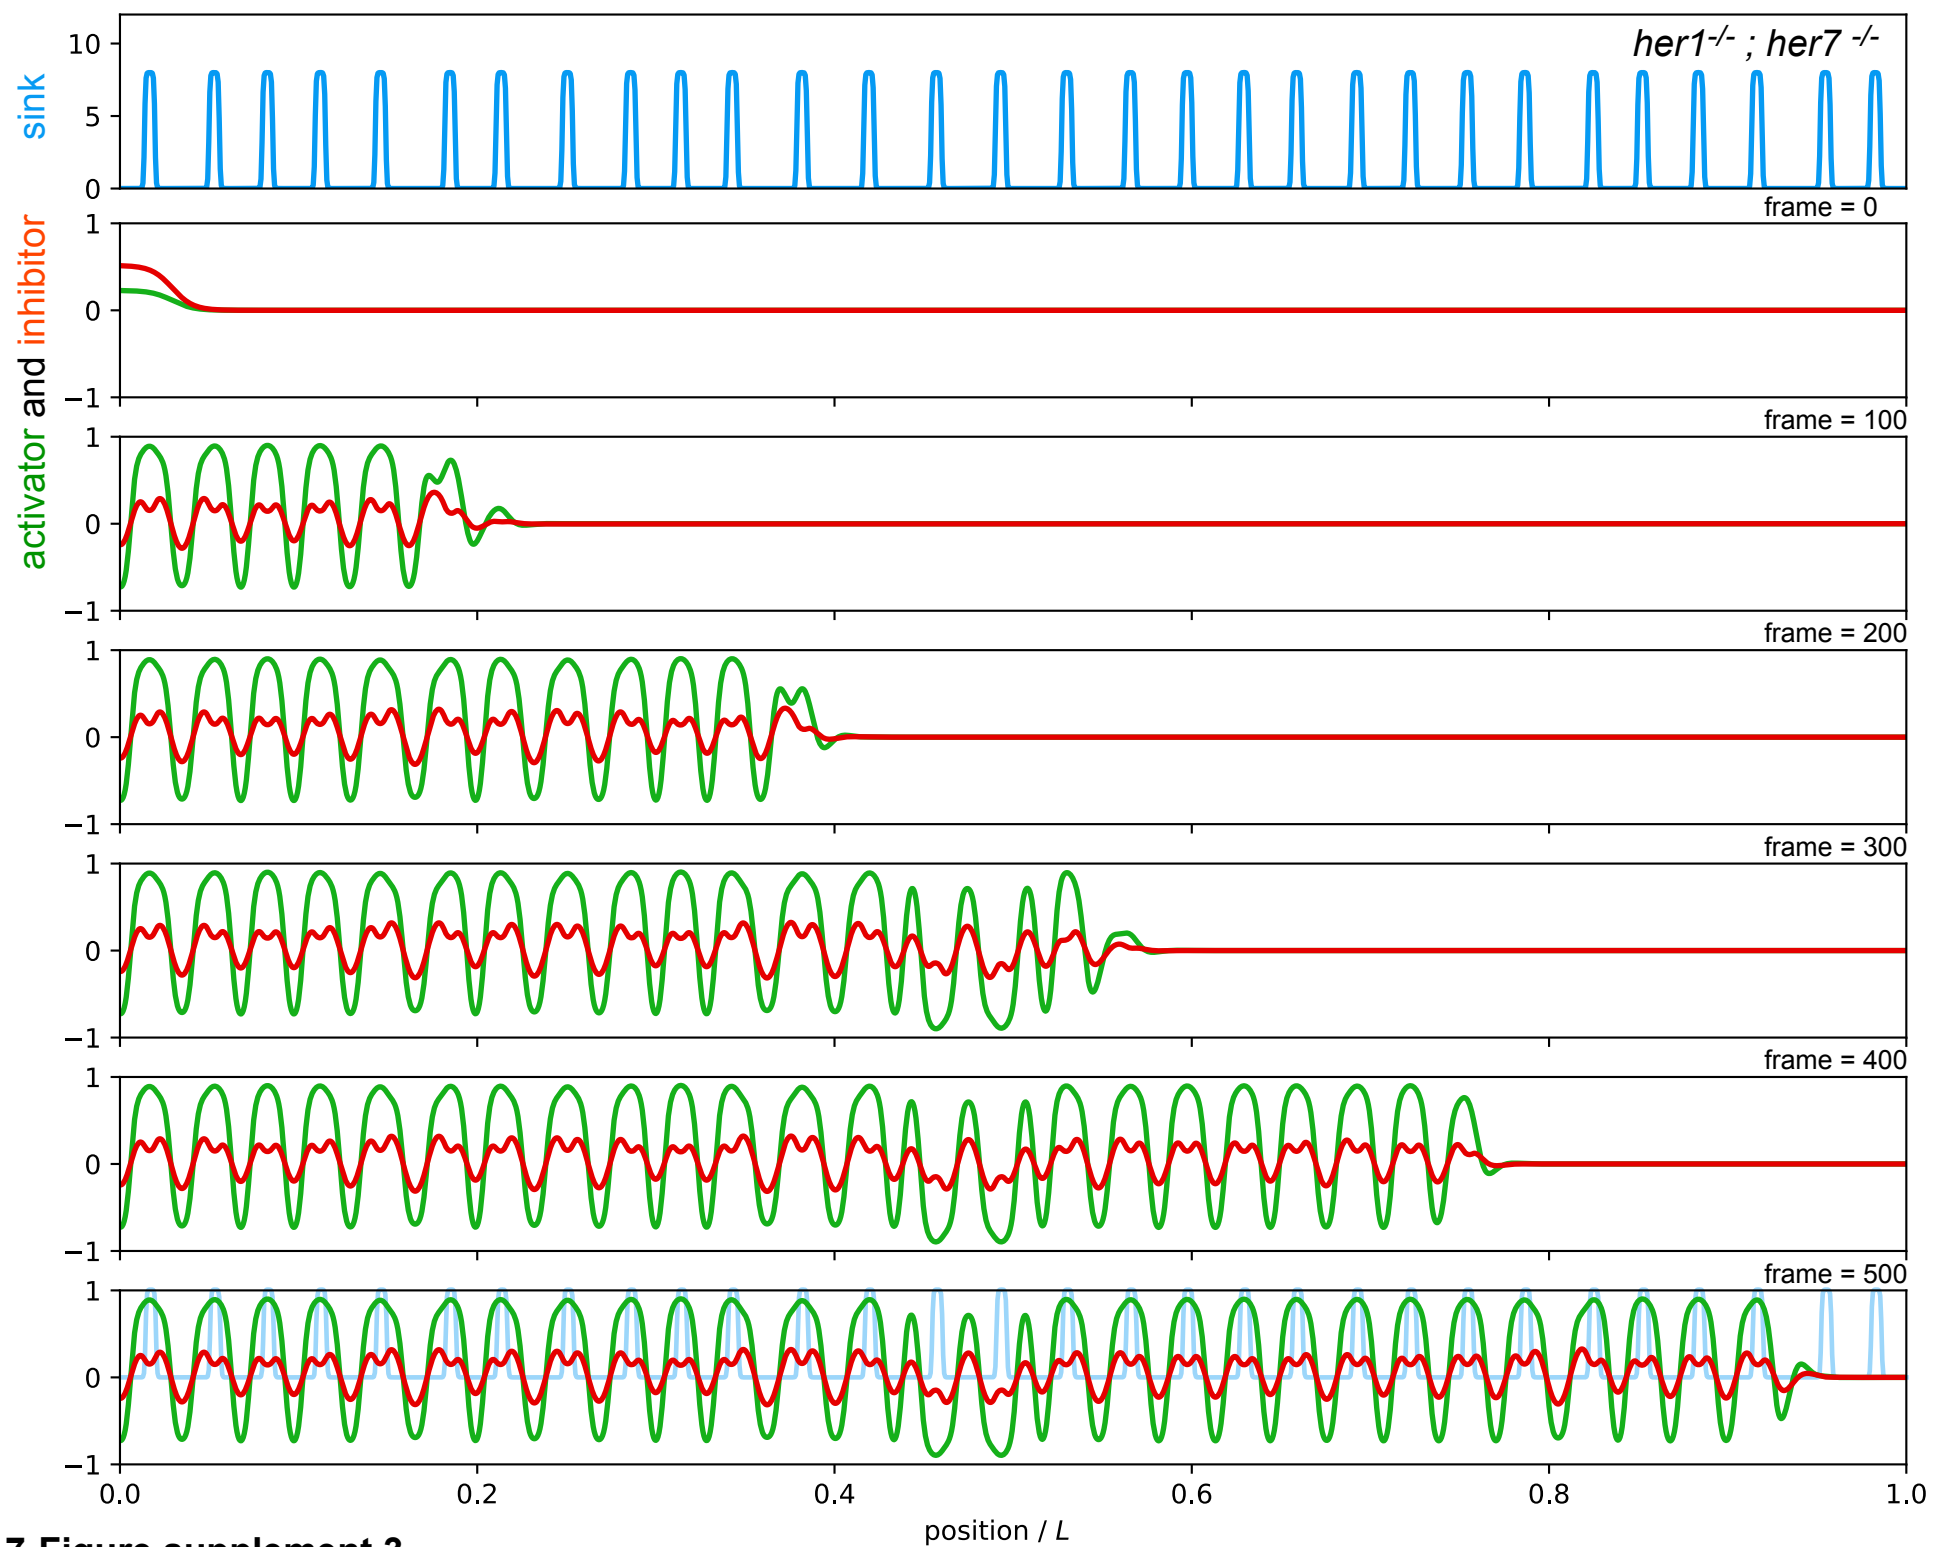

**Figure 7-Figure supplement 3**

Supplement: supp [file elife-33843-supp-v1.zip]

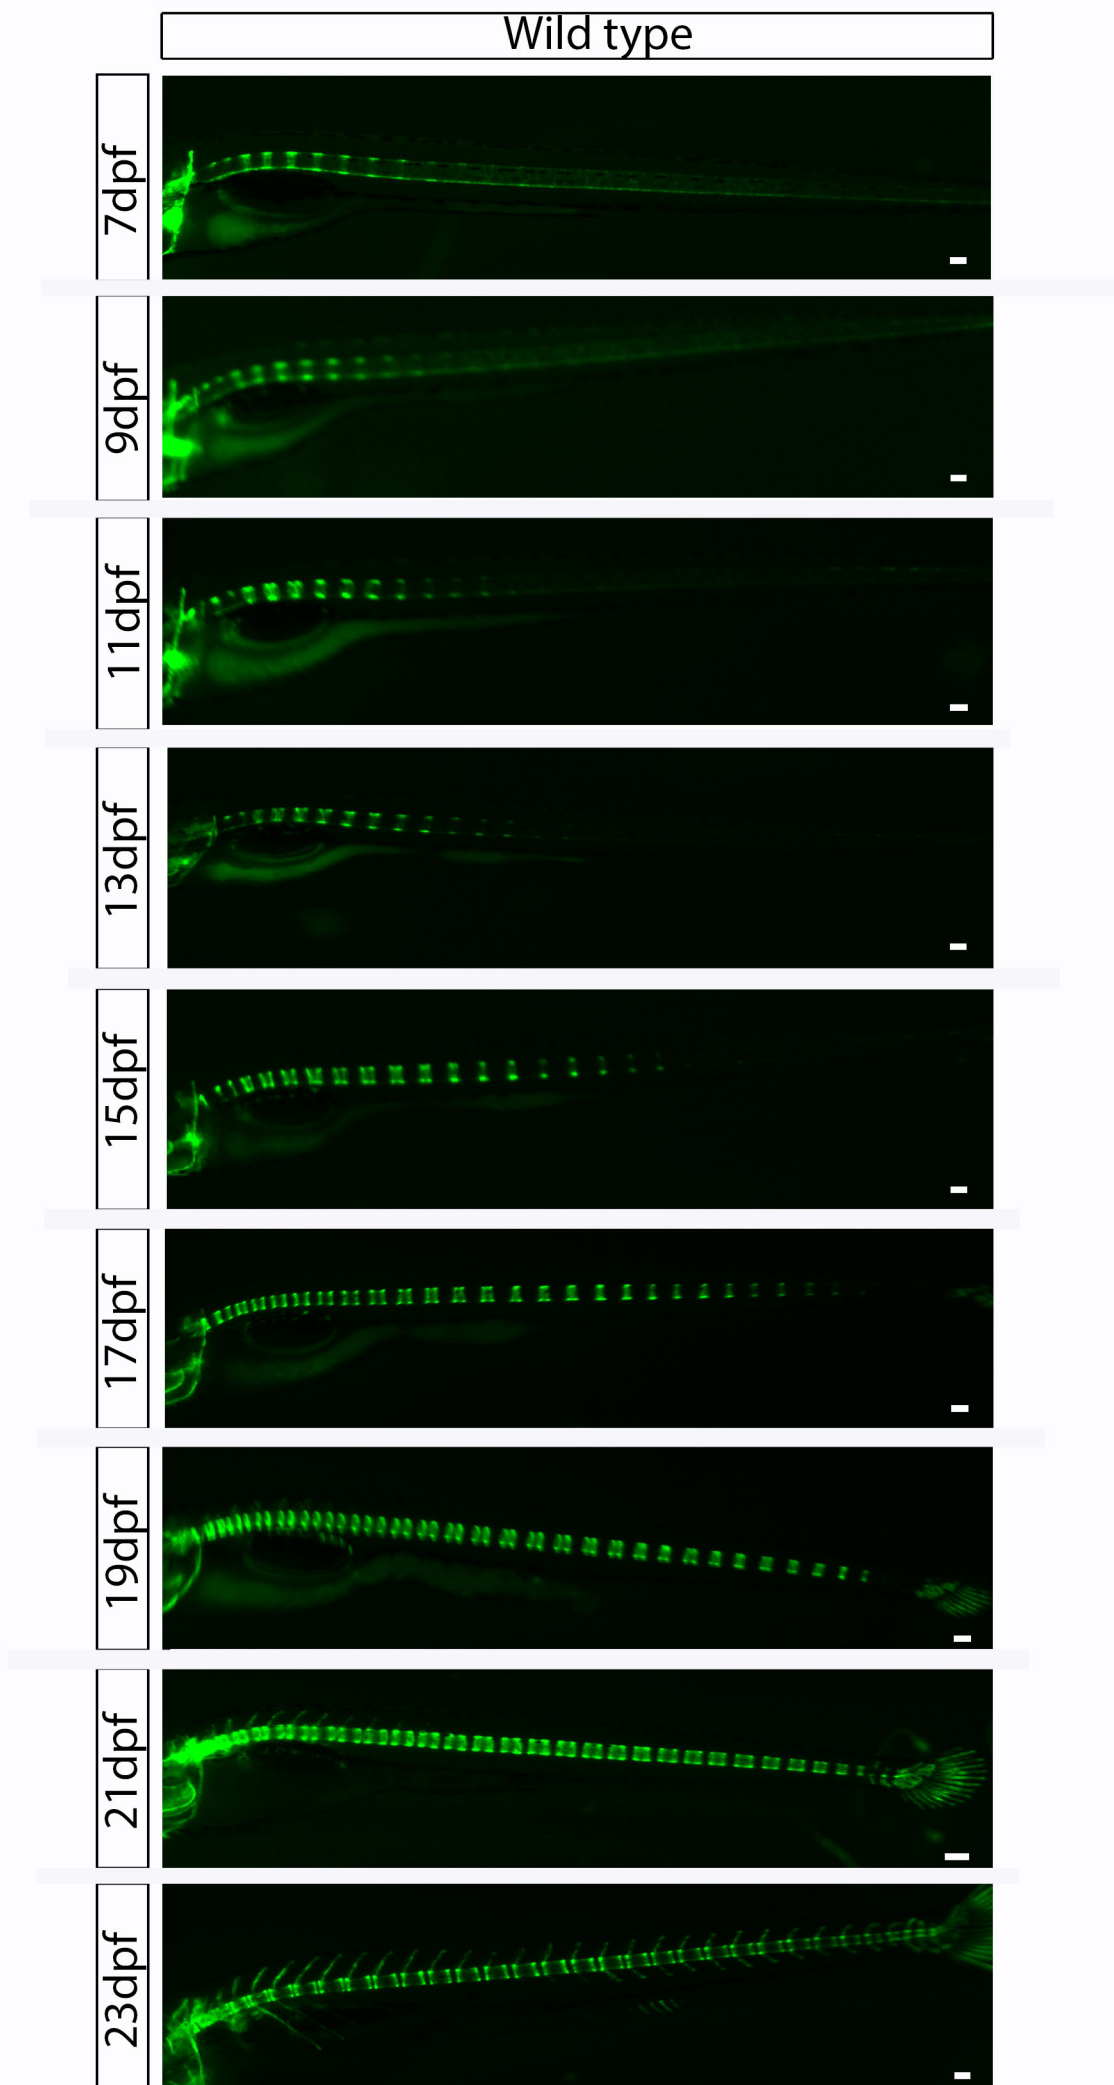

**Figure 4- figure supplement 1**

Supplement: supp [file elife-33843-supp-v1.zip]

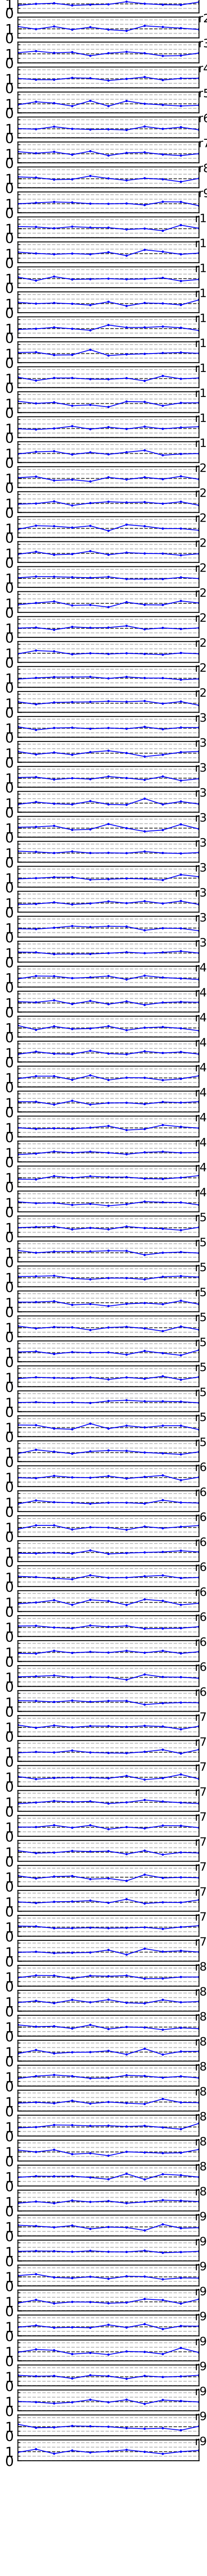

Supplement: supp [file elife-33843-supp-v1.zip]

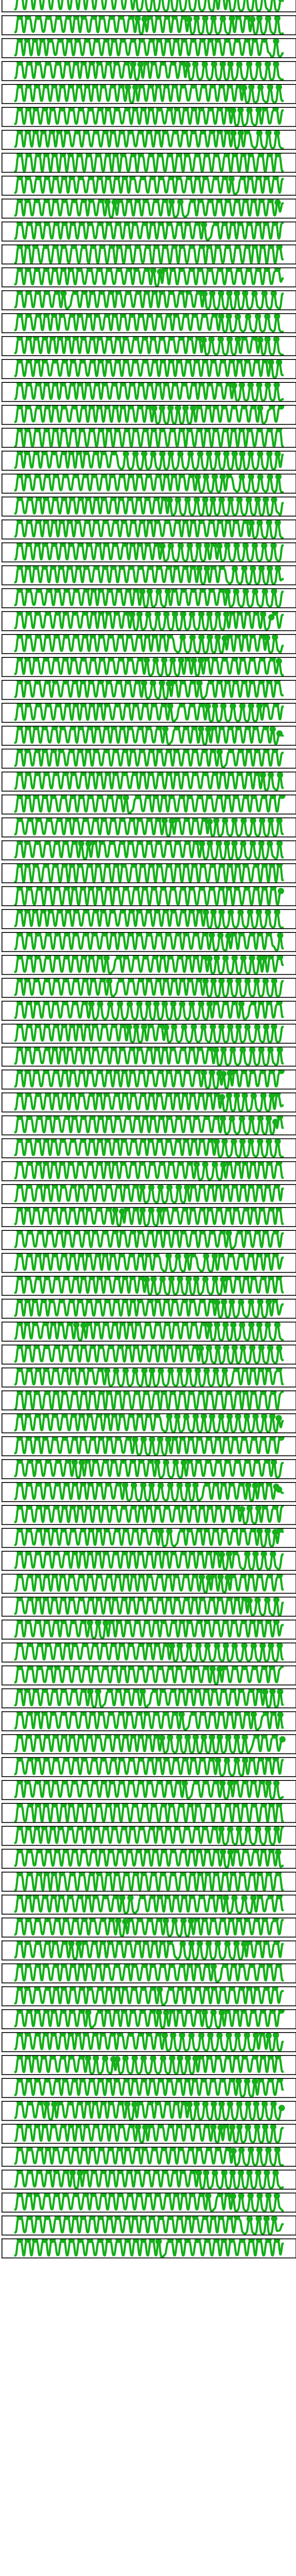

Supplement: supp [file elife-33843-supp-v1.zip]

# Histogram of peak counts



# Histogram of defects per embryo

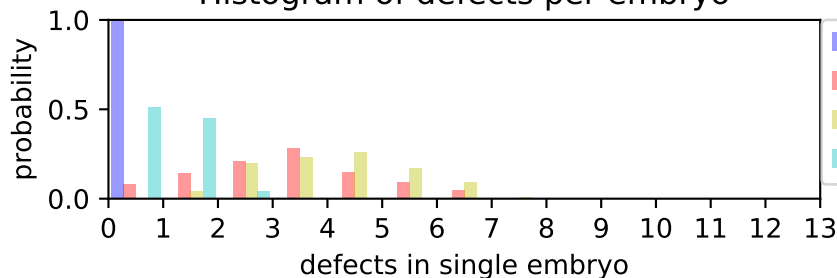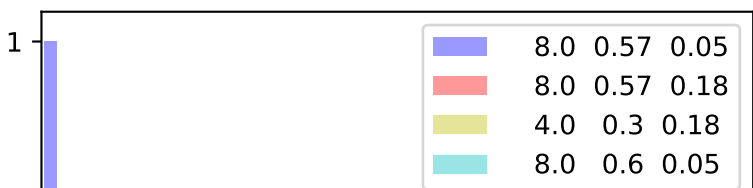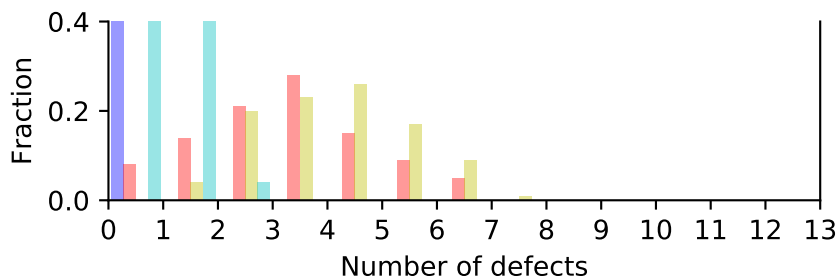

Supplement: supp [file elife-33843-supp-v1.zip]

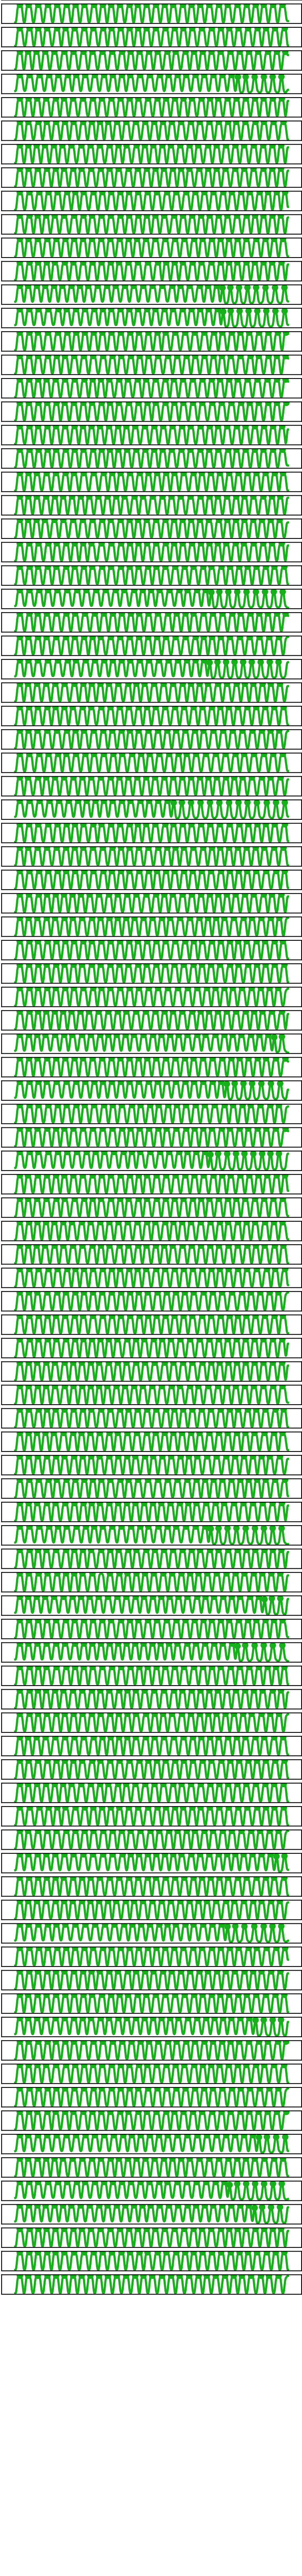

Supplement: supp [file elife-33843-supp-v1.zip]

# Histogram of peak counts

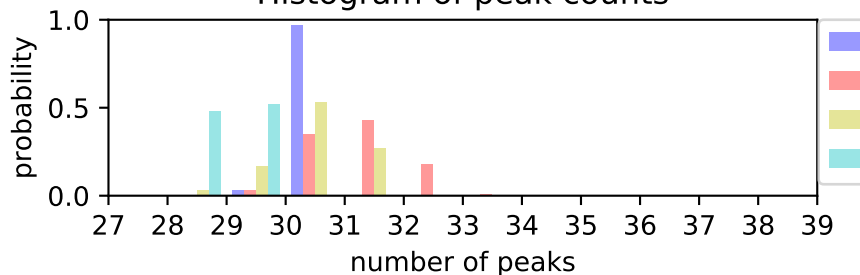

# Histogram of defects per embryo

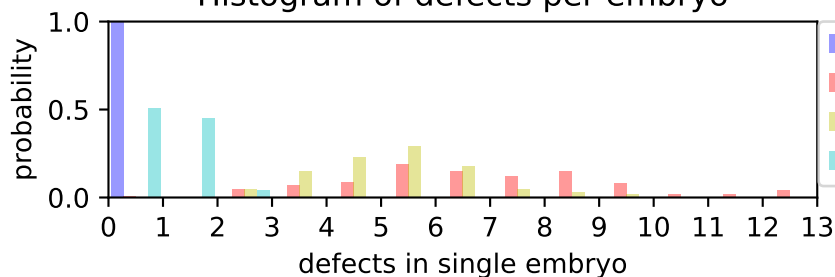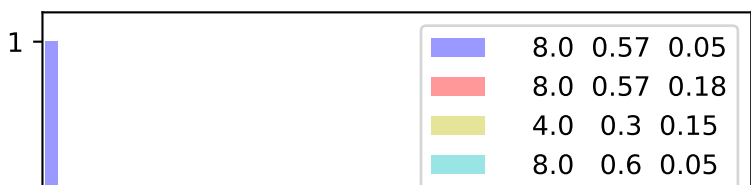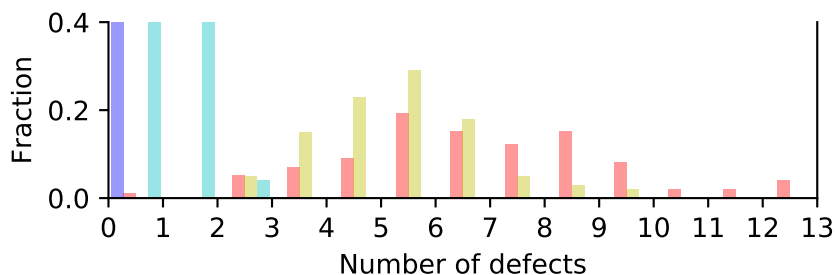

Supplement: supp [file elife-33843-supp-v1.zip]

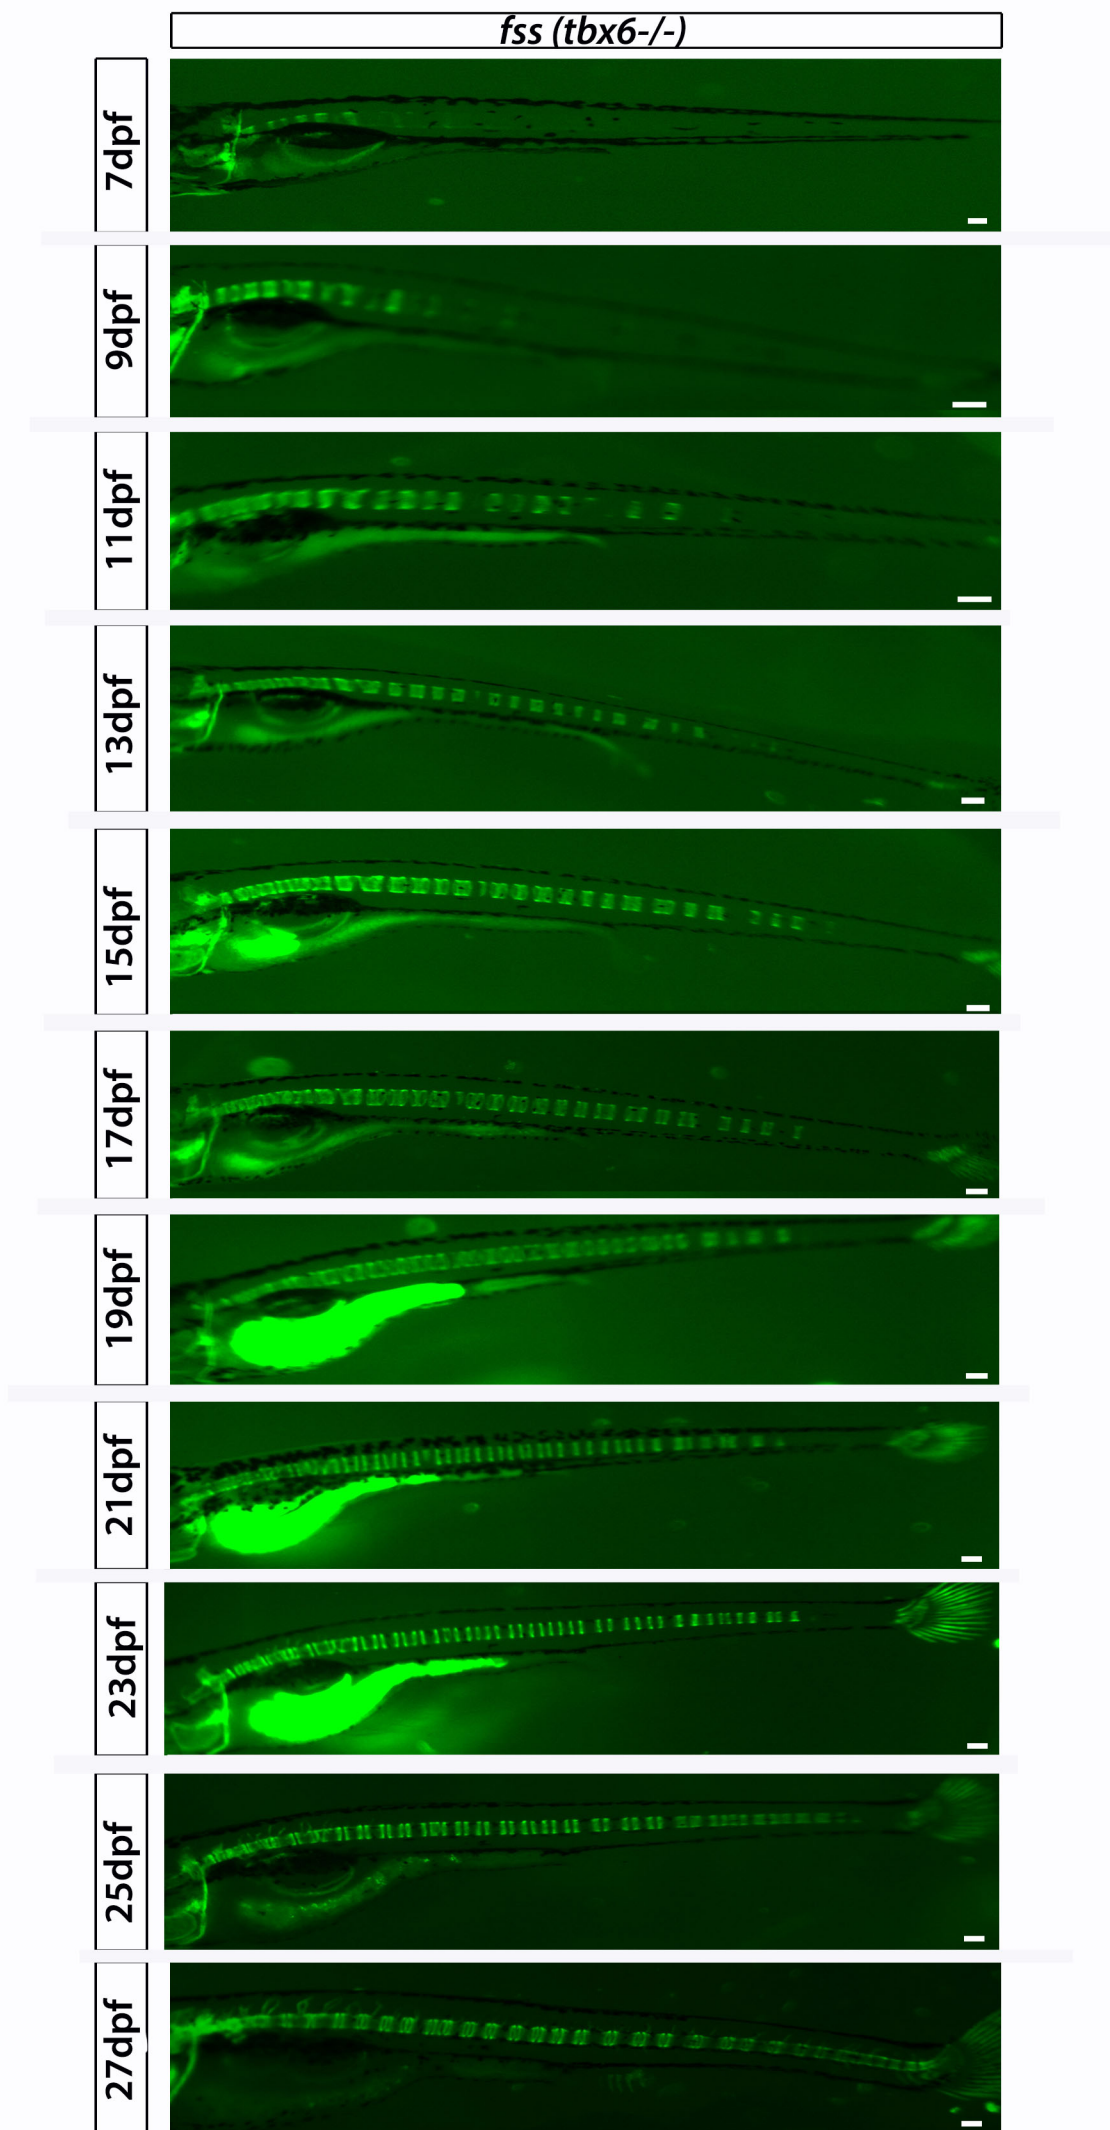

Figure 4- Figure supplement 2

Supplement: supp [file elife-33843-supp-v1.zip]

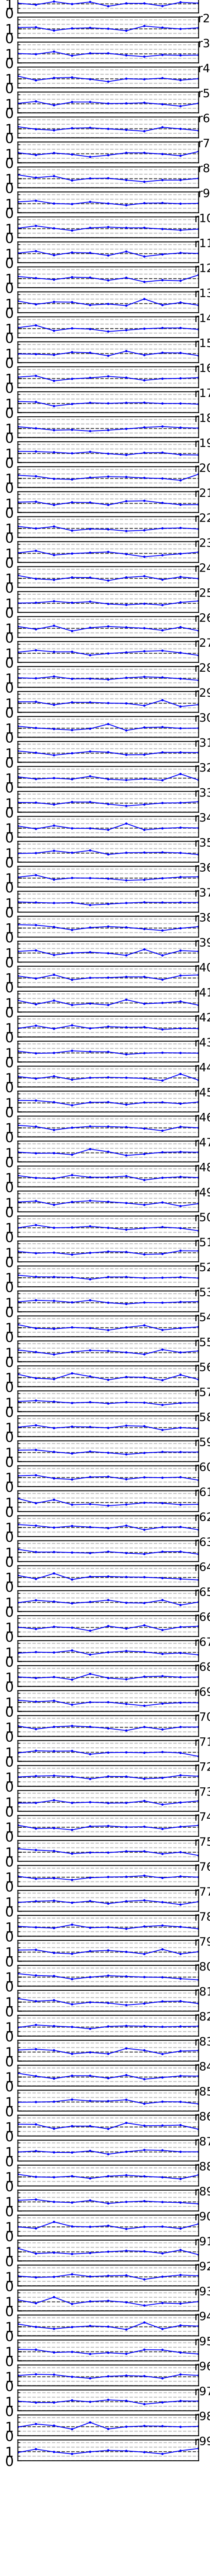

Supplement: supp [file elife-33843-supp-v1.zip]

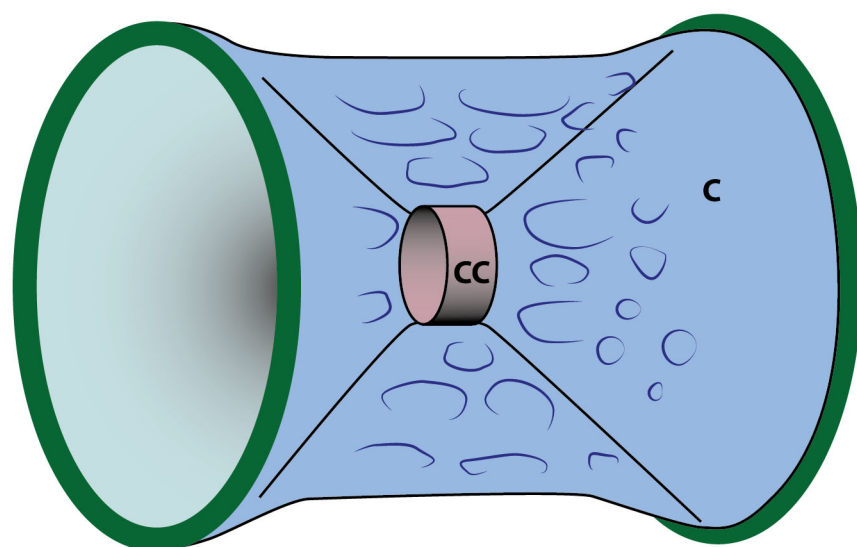

**Figure 2-figure supplement 2**

Supplement: supp [file elife-33843-supp-v1.zip]

# Histogram of peak counts

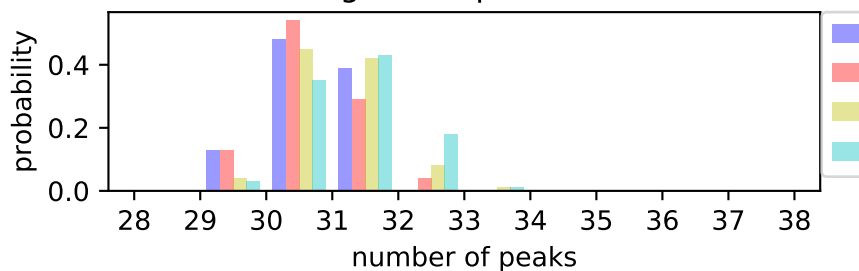

# Histogram of defects per embryo

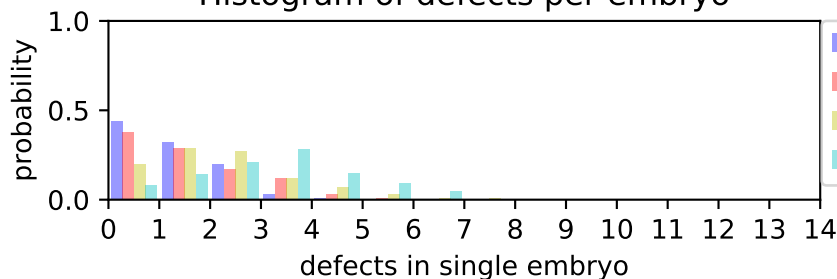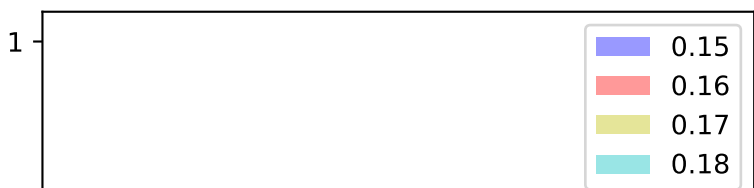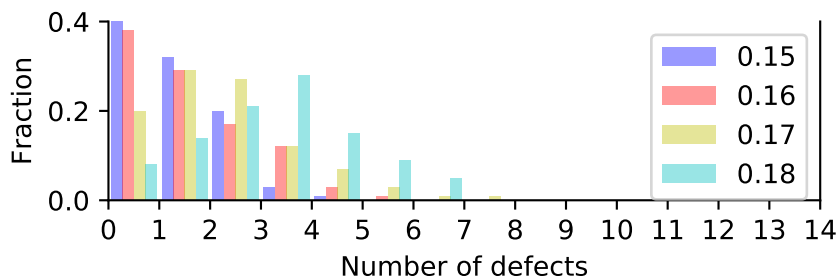

Supplement: supp [file elife-33843-supp-v1.zip]

# Histogram of peak counts



# Histogram of defects per embryo

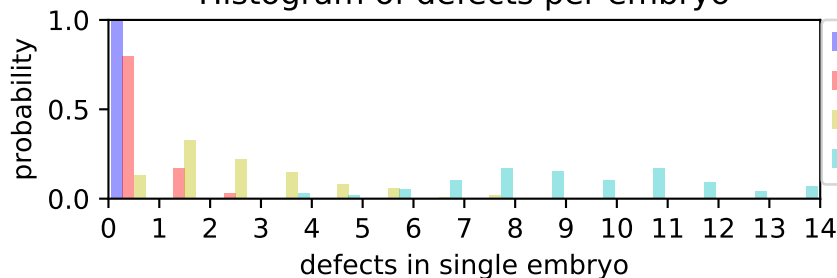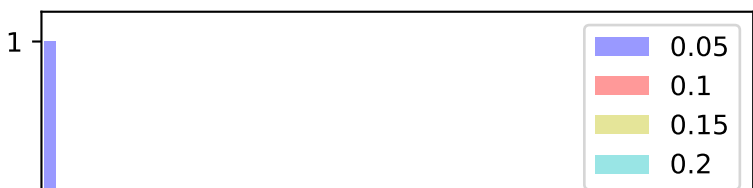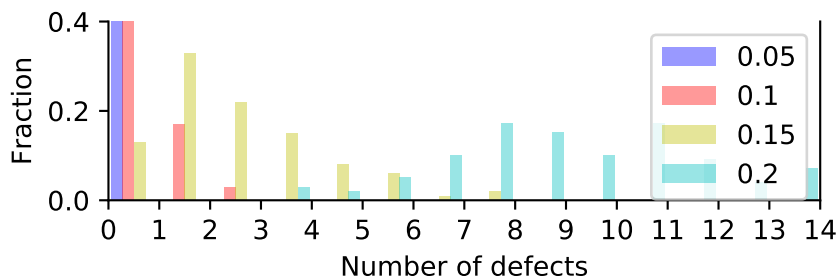

Supplement: supp [file elife-33843-supp-v1.zip]

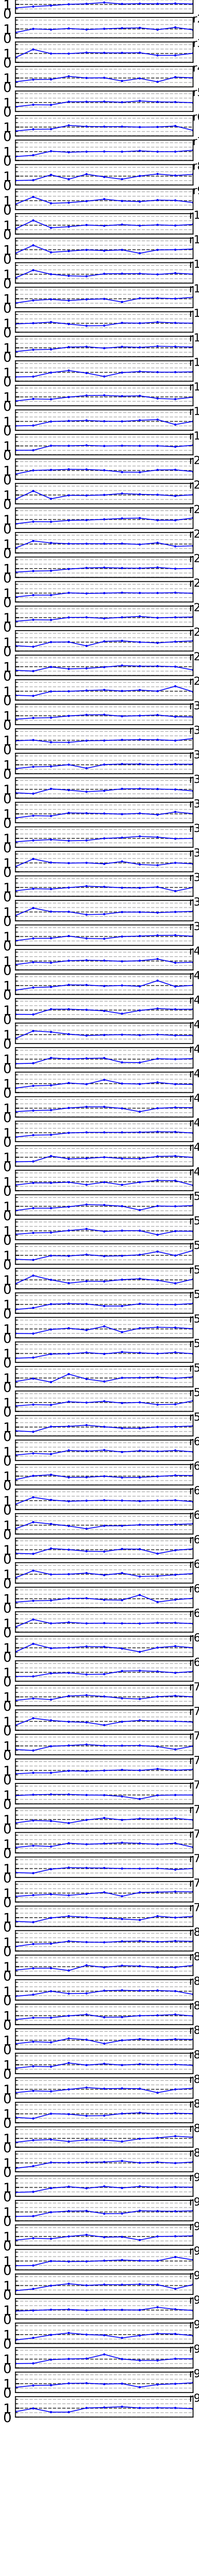

Supplement: supp [file elife-33843-supp-v1.zip]

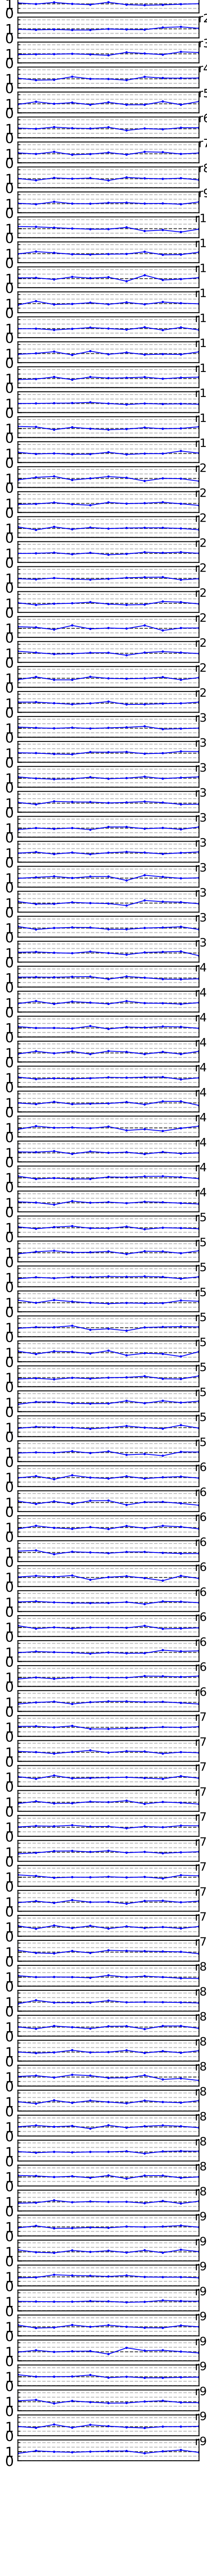

Supplement: supp [file elife-33843-supp-v1.zip]

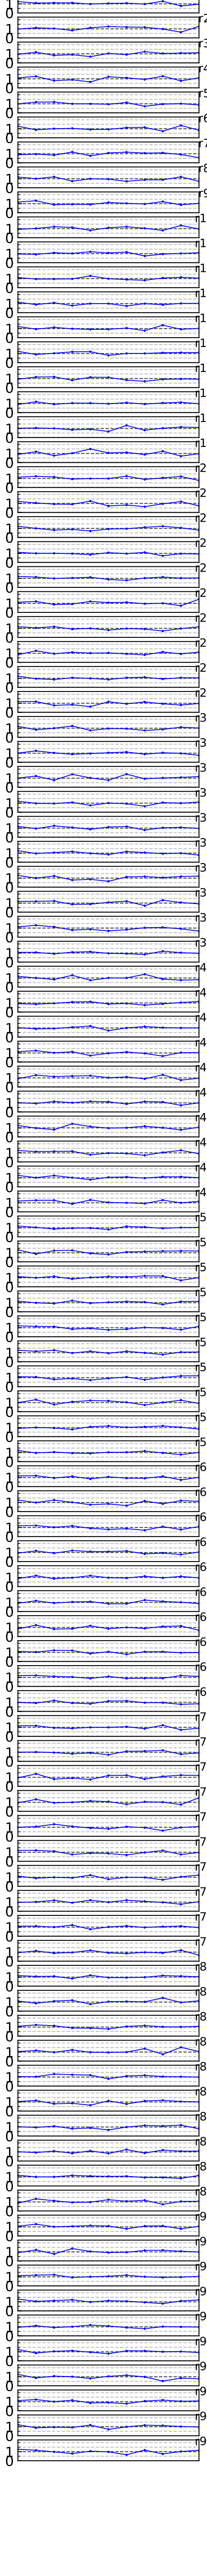

Supplement: supp [file elife-33843-supp-v1.zip]
