# Supplementary figures and images for: Segmentation of the zebrafish axial skeleton relies on notochord sheath cells and not on the segmentation clock (part 2 of 2)
Source: eLife journal article supplement (doi:10.7554/elife.33843), 2018-04-06

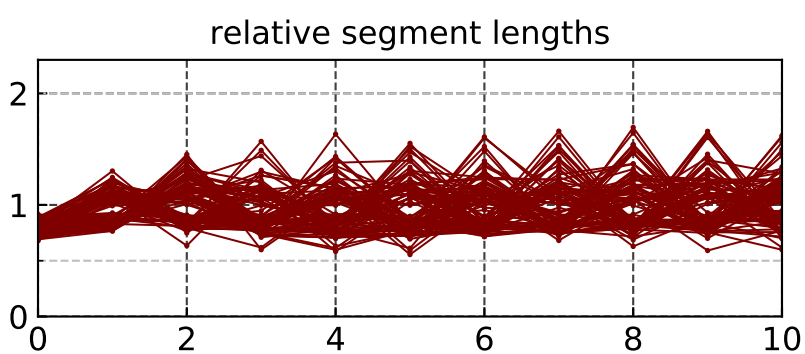

Supplement: supp [file elife-33843-supp-v1.zip]

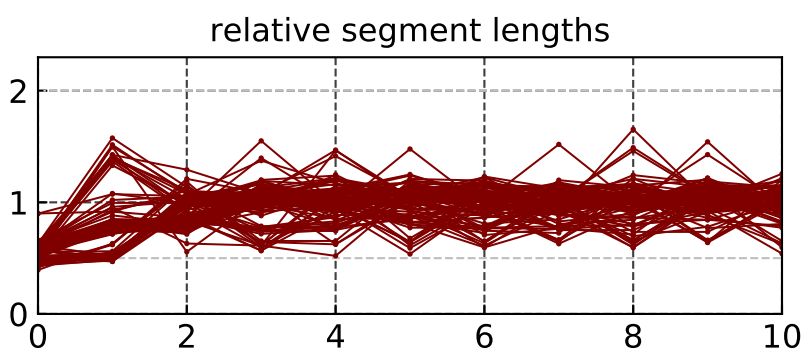

Supplement: supp [file elife-33843-supp-v1.zip]

activator, inhibitor, sink profile concentration

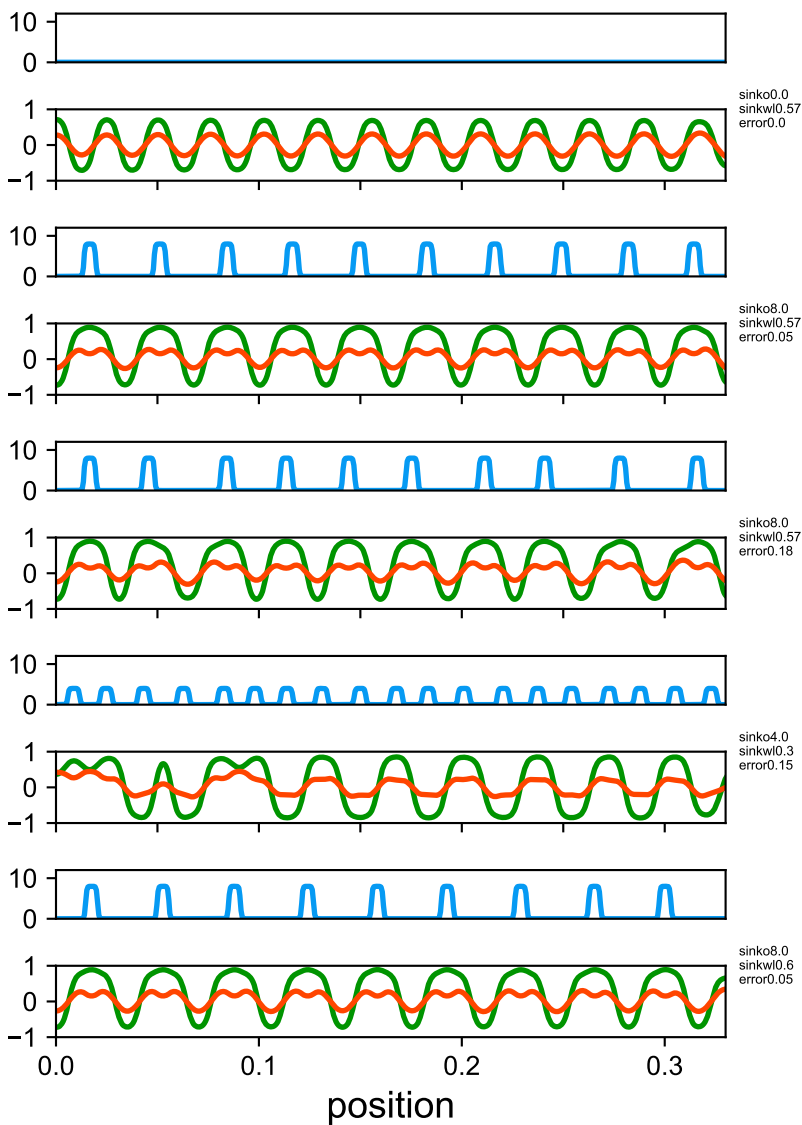

Supplement: supp [file elife-33843-supp-v1.zip]

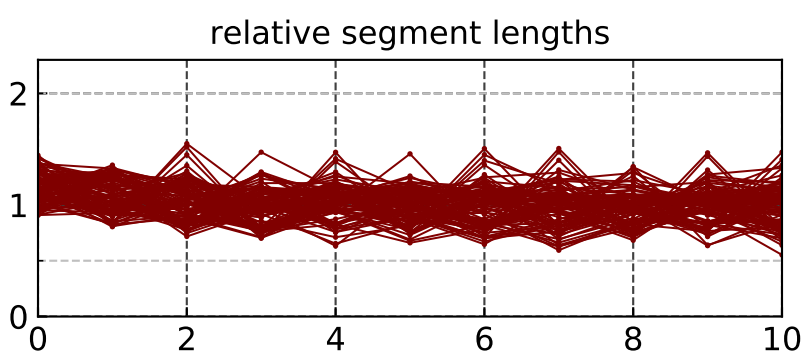

Supplement: supp [file elife-33843-supp-v1.zip]

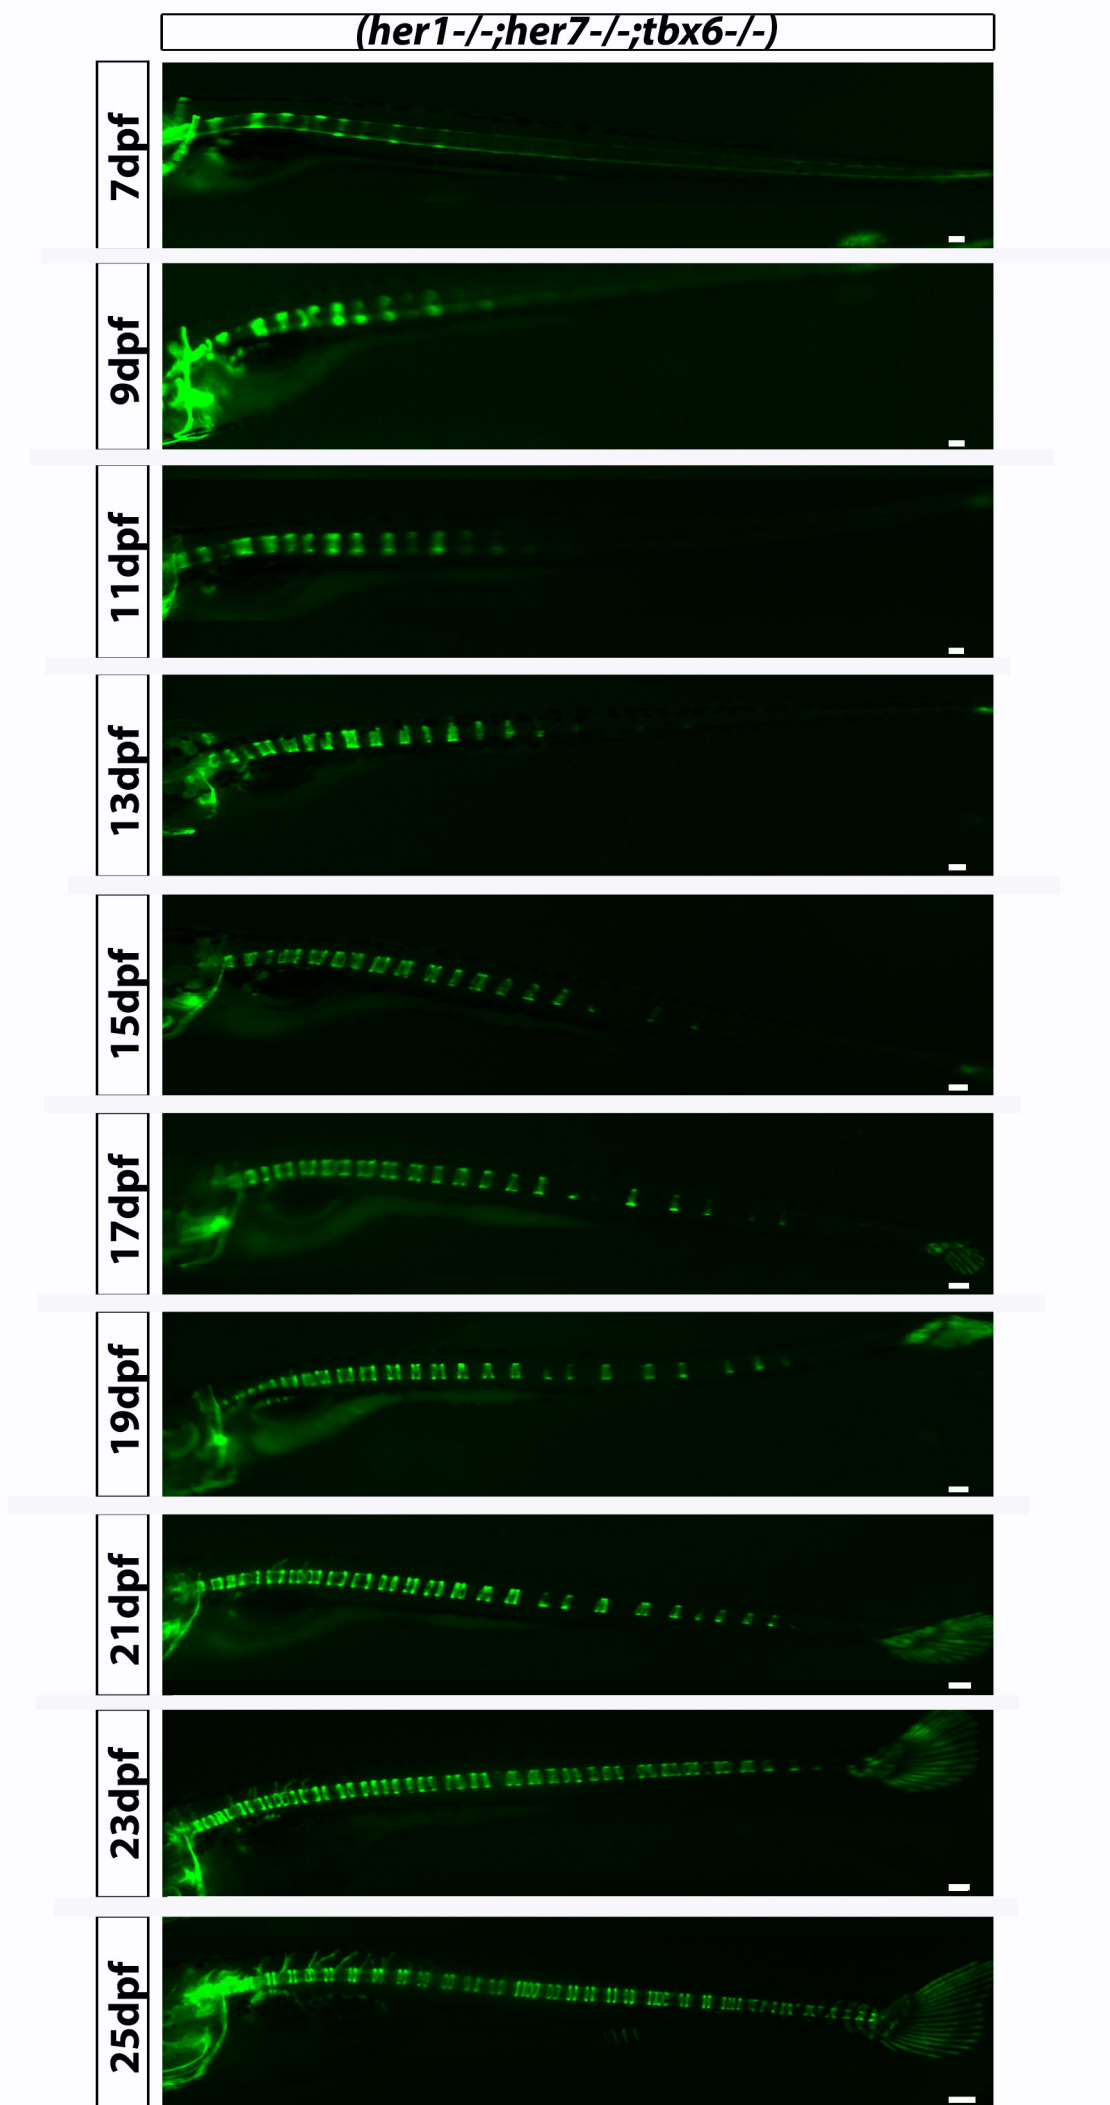

Figure 4- figure supplement 4

Supplement: supp [file elife-33843-supp-v1.zip]

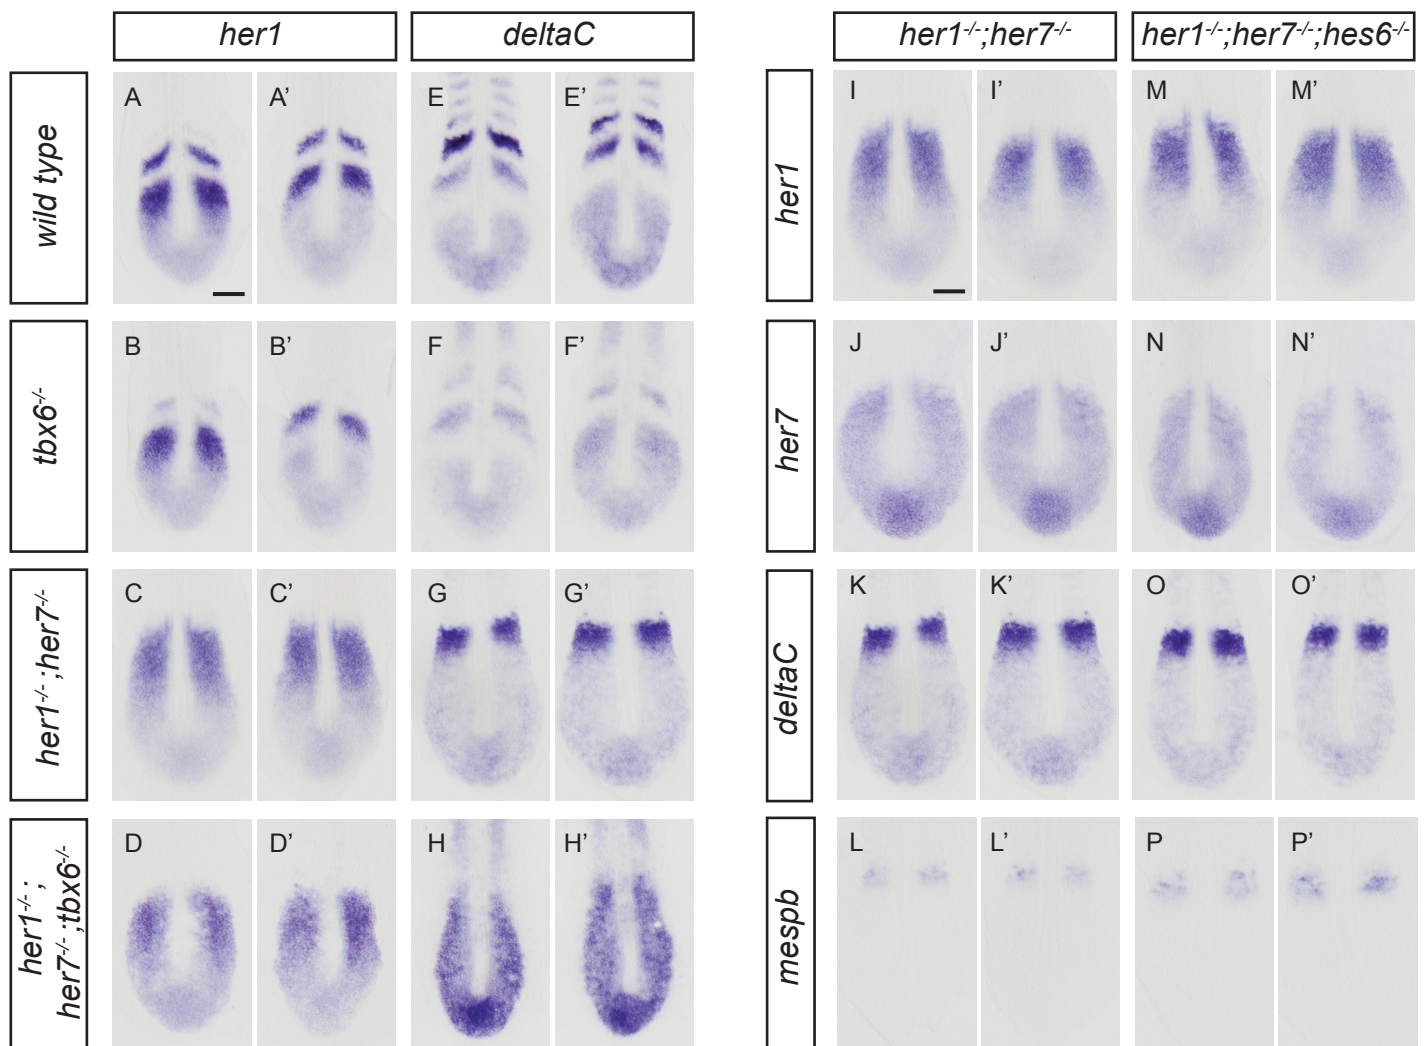

Figure 1 Supplement 2

Supplement: supp [file elife-33843-supp-v1.zip]

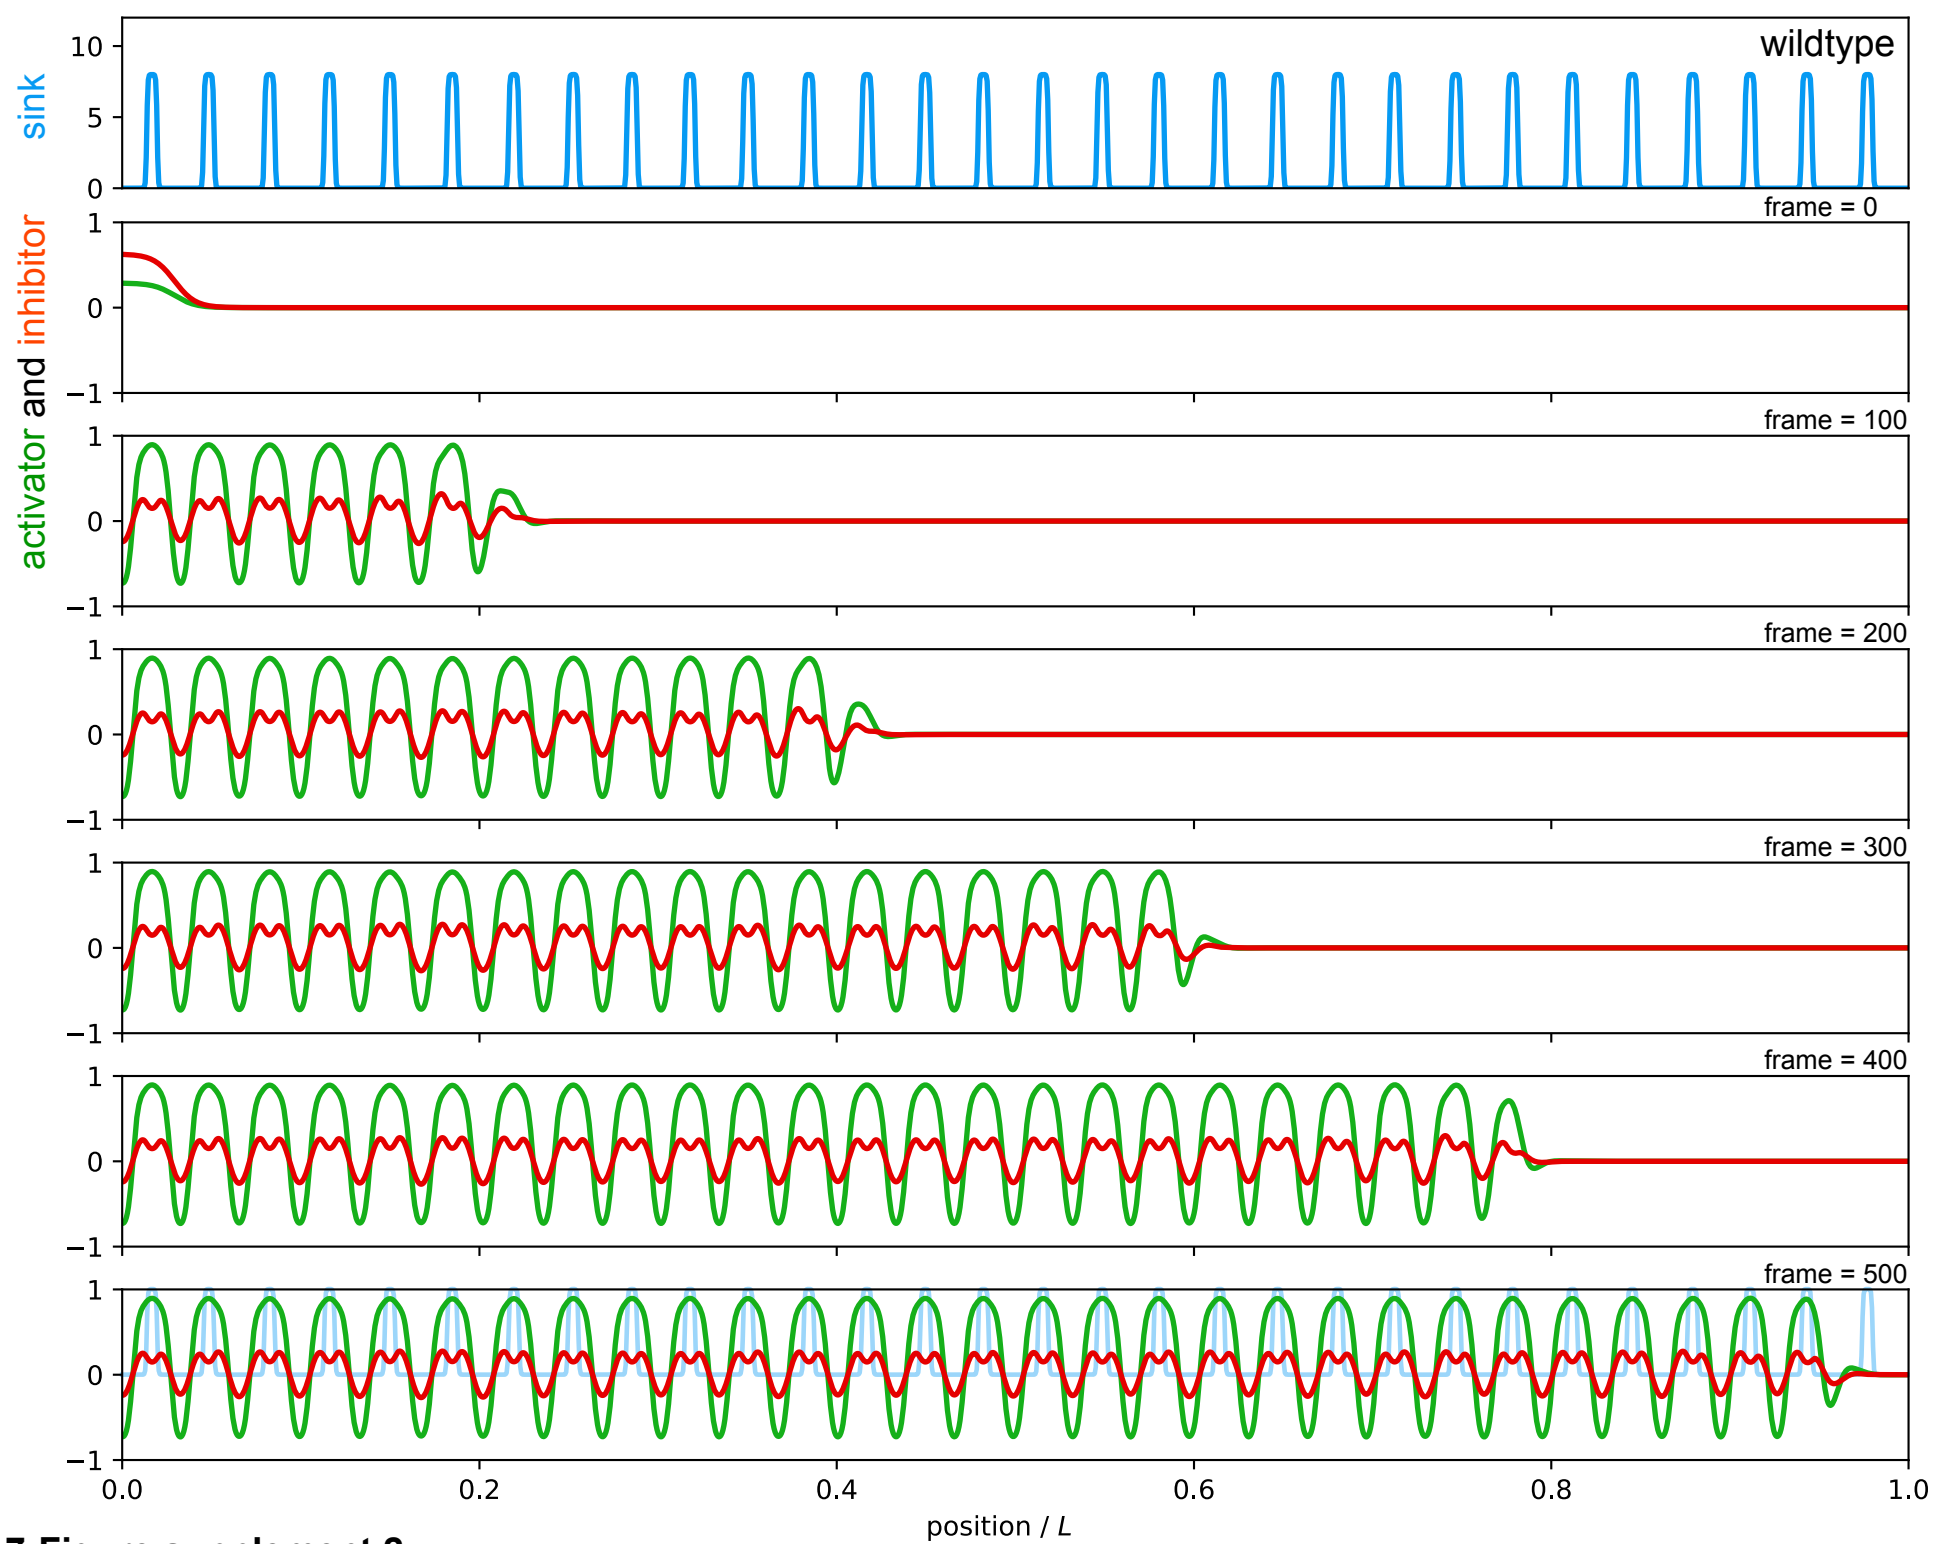

Figure 7-Figure supplement 2

Supplement: supp [file elife-33843-supp-v1.zip]
